# Supplementary material for: A multi-location peak parking approach for calculation of second dimensional retention indices for improved volatile compound identification with cryogen-free comprehensive heart-cut two-dimensional gas chromatography
Source: Royal Society of Chemistry journal article supplement (doi:10.1039/d0ay01976c), 2020-12-15
Supplement: d0ay01976c1.pdf [file d0ay01976c1.pdf]

## Supplementary information

**Manuscript Title:** Application of multi-location peak parking approach for calculation of second dimensional retention indices for improved volatile compound identification with cryogen-free comprehensive heart cut two-dimensional gas chromatography

Pannipa Janta,<sup>a</sup> Duangkamol Pinyo,<sup>b</sup> Yamonporn Yodta,<sup>b</sup> Porames Vasasiri,<sup>b</sup> Meinolf

Weidenbach,<sup>c</sup> Matthias Pursch,<sup>d</sup> Xiuhan (Grace) Yang<sup>\*e</sup> and Chadin Kulsing<sup>\*af</sup>

<sup>a</sup>. Department of Chemistry, Faculty of Science, Chulalongkorn University, Bangkok 10330, Thailand

<sup>b</sup>. The Center for Advanced Analytical Technology, Dow Chemical Thailand Ltd, Map Ta Phut Industrial Estate, Rayong 21150, Thailand

<sup>c</sup>. Polyurethanes Tech Center, Dow Deutschland Anlagen GmbH, 21677 Stade, Germany

<sup>d</sup>. Analytical Science, Dow Deutschland Anlagen GmbH, 21677 Stade, Germany

<sup>e</sup>. Dow Chemical China Investment Company, Shanghai 201203, China

<sup>f</sup>. Chromatographic Separation and Flavor Chemistry Research Unit and Center of Molecular Sensory Science, Department of Chemistry, Faculty of Science, Chulalongkorn University, Bangkok 10330, Thailand

\* Corresponding author: Tel: +862138513112; Email: gxyang@dow.com

\* Corresponding author: Tel: +66802971178; Email: ckulsing@gmail.com

**Table S-1.** The cyclic multiple H/C events with the 0.2 min H/C window consisting of 25 runs.

| Run 1 |     | Run 2 |     | Run 3 |     | Run 4 |     | Run 5 |     | Run 6 |     | Run 7 |     | Run 8 |     | Run 9 |     | Run 10 |     |
|-------|-----|-------|-----|-------|-----|-------|-----|-------|-----|-------|-----|-------|-----|-------|-----|-------|-----|--------|-----|
| 8.5   | On  | 8.7   | On  | 8.9   | On  | 9.1   | On  | 9.3   | On  | 9.5   | On  | 9.7   | On  | 9.9   | On  | 10.1  | On  | 10.3   | On  |
| 8.7   | Off | 8.9   | Off | 9.1   | Off | 9.3   | Off | 9.5   | Off | 9.7   | Off | 9.9   | Off | 10.1  | Off | 10.3  | Off | 10.5   | Off |
| 13.5  | On  | 13.7  | On  | 13.9  | On  | 14.1  | On  | 14.3  | On  | 14.5  | On  | 14.7  | On  | 14.9  | On  | 15.1  | On  | 15.3   | On  |
| 13.7  | Off | 13.9  | Off | 14.1  | Off | 14.3  | Off | 14.5  | Off | 14.7  | Off | 14.9  | Off | 15.1  | Off | 15.3  | Off | 15.5   | Off |
| 18.5  | On  | 18.7  | On  | 18.9  | On  | 19.1  | On  | 19.3  | On  | 19.5  | On  | 19.7  | On  | 19.9  | On  | 20.1  | On  | 20.3   | On  |
| 18.7  | Off | 18.9  | Off | 19.1  | Off | 19.3  | Off | 19.5  | Off | 19.7  | Off | 19.9  | Off | 20.1  | Off | 20.3  | Off | 20.5   | Off |
| 23.5  | On  | 23.7  | On  | 23.9  | On  | 24.1  | On  | 24.3  | On  | 24.5  | On  | 24.7  | On  | 24.9  | On  | 25.1  | On  | 25.3   | On  |
| 23.7  | Off | 23.9  | Off | 24.1  | Off | 24.3  | Off | 24.5  | Off | 24.7  | Off | 24.9  | Off | 25.1  | Off | 25.3  | Off | 25.5   | Off |
| 28.5  | On  | 28.7  | On  | 28.9  | On  | 29.1  | On  | 29.3  | On  | 29.5  | On  | 29.7  | On  | 29.9  | On  | 30.1  | On  | 30.3   | On  |
| 28.7  | Off | 28.9  | Off | 29.1  | Off | 29.3  | Off | 29.5  | Off | 29.7  | Off | 29.9  | Off | 30.1  | Off | 30.3  | Off | 30.5   | Off |
| 33.5  | On  | 33.7  | On  | 33.9  | On  | 34.1  | On  | 34.3  | On  | 34.5  | On  | 34.7  | On  | 34.9  | On  | 35.1  | On  | 35.3   | On  |
| 33.7  | Off | 33.9  | Off | 34.1  | Off | 34.3  | Off | 34.5  | Off | 34.7  | Off | 34.9  | Off | 35.1  | Off | 35.3  | Off | 35.5   | Off |
| 38.5  | On  | 38.7  | On  | 38.9  | On  | 39.1  | On  | 39.3  | On  | 39.5  | On  | 39.7  | On  | 39.9  | On  | 40.1  | On  | 40.3   | On  |
| 38.7  | Off | 38.9  | Off | 39.1  | Off | 39.3  | Off | 39.5  | Off | 39.7  | Off | 39.9  | Off | 40.1  | Off | 40.3  | Off | 40.5   | Off |
| 43.5  | On  | 43.7  | On  | 43.9  | On  | 44.1  | On  | 44.3  | On  | 44.5  | On  | 44.7  | On  | 44.9  | On  | 45.1  | On  | 45.3   | On  |
| 43.7  | Off | 43.9  | Off | 44.1  | Off | 44.3  | Off | 44.5  | Off | 44.7  | Off | 44.9  | Off | 45.1  | Off | 45.3  | Off | 45.5   | Off |
| 48.5  | On  | 48.7  | On  | 48.9  | On  | 49.1  | On  | 49.3  | On  | 49.5  | On  | 49.7  | On  | 49.9  | On  | 50.1  | On  | 50.3   | On  |
| 48.7  | Off | 48.9  | Off | 49.1  | Off | 49.3  | Off | 49.5  | Off | 49.7  | Off | 49.9  | Off | 50.1  | Off | 50.3  | Off | 50.5   | Off |

| Run 11 |     | Run 12 |     | Run 13 |     | Run 14 |     | Run 15 |     | Run 16 |     | Run 17 |     | Run 18 |     | Run 19 |     | Run 20 |     |
|--------|-----|--------|-----|--------|-----|--------|-----|--------|-----|--------|-----|--------|-----|--------|-----|--------|-----|--------|-----|
| 10.5   | On  | 10.7   | On  | 10.9   | On  | 11.1   | On  | 11.3   | On  | 11.5   | On  | 11.7   | On  | 11.9   | On  | 12.1   | On  | 12.3   | On  |
| 10.7   | Off | 10.9   | Off | 11.1   | Off | 11.3   | Off | 11.5   | Off | 11.7   | Off | 11.9   | Off | 12.1   | Off | 12.3   | Off | 12.5   | Off |
| 15.5   | On  | 15.7   | On  | 15.9   | On  | 16.1   | On  | 16.3   | On  | 16.5   | On  | 16.7   | On  | 16.9   | On  | 17.1   | On  | 17.3   | On  |
| 15.7   | Off | 15.9   | Off | 16.1   | Off | 16.3   | Off | 16.5   | Off | 16.7   | Off | 16.9   | Off | 17.1   | Off | 17.3   | Off | 17.5   | Off |
| 20.5   | On  | 20.7   | On  | 20.9   | On  | 21.1   | On  | 21.3   | On  | 21.5   | On  | 21.7   | On  | 21.9   | On  | 22.1   | On  | 22.3   | On  |
| 20.7   | Off | 20.9   | Off | 21.1   | Off | 21.3   | Off | 21.5   | Off | 21.7   | Off | 21.9   | Off | 22.1   | Off | 22.3   | Off | 22.5   | Off |
| 25.5   | On  | 25.7   | On  | 25.9   | On  | 26.1   | On  | 26.3   | On  | 26.5   | On  | 26.7   | On  | 26.9   | On  | 27.1   | On  | 27.3   | On  |
| 25.7   | Off | 25.9   | Off | 26.1   | Off | 26.3   | Off | 26.5   | Off | 26.7   | Off | 26.9   | Off | 27.1   | Off | 27.3   | Off | 27.5   | Off |
| 30.5   | On  | 30.7   | On  | 30.9   | On  | 31.1   | On  | 31.3   | On  | 31.5   | On  | 31.7   | On  | 31.9   | On  | 32.1   | On  | 32.3   | On  |
| 30.7   | Off | 30.9   | Off | 31.1   | Off | 31.3   | Off | 31.5   | Off | 31.7   | Off | 31.9   | Off | 32.1   | Off | 32.3   | Off | 32.5   | Off |
| 35.5   | On  | 35.7   | On  | 35.9   | On  | 36.1   | On  | 36.3   | On  | 36.5   | On  | 36.7   | On  | 36.9   | On  | 37.1   | On  | 37.3   | On  |
| 35.7   | Off | 35.9   | Off | 36.1   | Off | 36.3   | Off | 36.5   | Off | 36.7   | Off | 36.9   | Off | 37.1   | Off | 37.3   | Off | 37.5   | Off |
| 40.5   | On  | 40.7   | On  | 40.9   | On  | 41.1   | On  | 41.3   | On  | 41.5   | On  | 41.7   | On  | 41.9   | On  | 42.1   | On  | 42.3   | On  |
| 40.7   | Off | 40.9   | Off | 41.1   | Off | 41.3   | Off | 41.5   | Off | 41.7   | Off | 41.9   | Off | 42.1   | Off | 42.3   | Off | 42.5   | Off |
| 45.5   | On  | 45.7   | On  | 45.9   | On  | 46.1   | On  | 46.3   | On  | 46.5   | On  | 46.7   | On  | 46.9   | On  | 47.1   | On  | 47.3   | On  |
| 45.7   | Off | 45.9   | Off | 46.1   | Off | 46.3   | Off | 46.5   | Off | 46.7   | Off | 46.9   | Off | 47.1   | Off | 47.3   | Off | 47.5   | Off |
| 50.5   | On  | 50.7   | On  | 50.9   | On  | 51.1   | On  | 51.3   | On  | 51.5   | On  | 51.7   | On  | 51.9   | On  | 52.1   | On  | 52.3   | On  |
| 50.7   | Off | 50.9   | Off | 51.1   | Off | 51.3   | Off | 51.5   | Off | 51.7   | Off | 51.9   | Off | 52.1   | Off | 52.3   | Off | 52.5   | Off |

| Run 21 |     | Run 22 |     | Run 23 |     | Run 24 |     | Run 25 |     |
|--------|-----|--------|-----|--------|-----|--------|-----|--------|-----|
| 12.5   | On  | 12.7   | On  | 12.9   | On  | 13.1   | On  | 13.3   | On  |
| 12.7   | Off | 12.9   | Off | 13.1   | Off | 13.3   | Off | 13.5   | Off |
| 17.5   | On  | 17.7   | On  | 17.9   | On  | 18.1   | On  | 18.3   | On  |
| 17.7   | Off | 17.9   | Off | 18.1   | Off | 18.3   | Off | 18.5   | Off |
| 22.5   | On  | 22.7   | On  | 22.9   | On  | 23.1   | On  | 23.3   | On  |
| 22.7   | Off | 22.9   | Off | 23.1   | Off | 23.3   | Off | 23.5   | Off |
| 27.5   | On  | 27.7   | On  | 27.9   | On  | 28.1   | On  | 28.3   | On  |
| 27.7   | Off | 27.9   | Off | 28.1   | Off | 28.3   | Off | 28.5   | Off |
| 32.5   | On  | 32.7   | On  | 32.9   | On  | 33.1   | On  | 33.3   | On  |
| 32.7   | Off | 32.9   | Off | 33.1   | Off | 33.3   | Off | 33.5   | Off |
| 37.5   | On  | 37.7   | On  | 37.9   | On  | 38.1   | On  | 38.3   | On  |
| 37.7   | Off | 37.9   | Off | 38.1   | Off | 38.3   | Off | 38.5   | Off |
| 42.5   | On  | 42.7   | On  | 42.9   | On  | 43.1   | On  | 43.3   | On  |
| 42.7   | Off | 42.9   | Off | 43.1   | Off | 43.3   | Off | 43.5   | Off |
| 47.5   | On  | 47.7   | On  | 47.9   | On  | 48.1   | On  | 48.3   | On  |
| 47.7   | Off | 47.9   | Off | 48.1   | Off | 48.3   | Off | 48.5   | Off |
| 52.5   | On  | 52.7   | On  | 52.9   | On  | 53.1   | On  | 53.3   | On  |
| 52.7   | Off | 52.9   | Off | 53.1   | Off | 53.3   | Off | 53.5   | Off |

**Table S-2.** The multi-location peak parking for the construction of *n*-alkane isovolatility curves.

| No.    | Run No. | Injection                  | Temperature program                                 |
|--------|---------|----------------------------|-----------------------------------------------------|
| Set 1  | Parking | <i>n</i> -alkane standards | 35°C → 100°C with ramp rate 20°C/min                |
|        | Run-off | blank vial                 | The same with perfume sample in off mode            |
|        | Parking | <i>n</i> -alkane standards | 35°C → 100°C with ramp rate 20°C/min                |
|        | Run-on  | blank vial                 | The same with perfume sample in on mode             |
| Set 2  | Parking | <i>n</i> -alkane standards | 35°C → 120°C with ramp rate 20°C/min                |
|        | Run-off | blank vial                 | The same with perfume sample in off mode            |
|        | Parking | <i>n</i> -alkane standards | 35°C → 120°C with ramp rate 20°C/min                |
|        | Run-on  | blank vial                 | The same with perfume sample in on mode             |
| Set 3  | Parking | <i>n</i> -alkane standards | 35°C → 140°C with ramp rate 20°C/min                |
|        | Run-off | blank vial                 | The same with perfume sample in off mode            |
|        | Parking | <i>n</i> -alkane standards | 35°C → 140°C with ramp rate 20°C/min                |
|        | Run-on  | blank vial                 | The same with perfume sample in on mode             |
| Set 4  | Parking | <i>n</i> -alkane standards | 35°C → 160°C with ramp rate 20°C/min                |
|        | Run-off | blank vial                 | The same with perfume sample in off mode            |
|        | Parking | <i>n</i> -alkane standards | 35°C → 160°C with ramp rate 20°C/min                |
|        | Run-on  | blank vial                 | The same with perfume sample in on mode             |
| Set 5  | Parking | <i>n</i> -alkane standards | 35°C → 180°C with ramp rate 20°C/min                |
|        | Run-off | blank vial                 | The same with perfume sample in off mode            |
|        | Parking | <i>n</i> -alkane standards | 35°C → 180°C with ramp rate 20°C/min                |
|        | Run-on  | blank vial                 | The same with perfume sample in on mode             |
| Set 6  | Parking | <i>n</i> -alkane standards | 35°C → 200°C with ramp rate 20°C/min                |
|        | Run-off | blank vial                 | The same with perfume sample in off mode            |
|        | Parking | <i>n</i> -alkane standards | 35°C → 200°C with ramp rate 20°C/min                |
|        | Run-on  | blank vial                 | The same with perfume sample in on mode             |
| Set 7  | Parking | <i>n</i> -alkane standards | 35°C → 220°C with ramp rate 20°C/min                |
|        | Run-off | blank vial                 | The same with perfume sample in off mode            |
|        | Parking | <i>n</i> -alkane standards | 35°C → 220°C with ramp rate 20°C/min                |
|        | Run-on  | blank vial                 | The same with perfume sample in on mode             |
| Set 8  | Parking | <i>n</i> -alkane standards | 35°C → 240°C with ramp rate 20°C/min                |
|        | Run-off | blank vial                 | The same with perfume sample in off mode            |
|        | Parking | <i>n</i> -alkane standards | 35°C → 240°C with ramp rate 20°C/min                |
|        | Run-on  | blank vial                 | The same with perfume sample in on mode             |
| Set 9  | Parking | <i>n</i> -alkane standards | 35°C → 240°C with ramp rate 20°C/min and hold 2 min |
|        | Run-off | blank vial                 | The same with perfume sample in off mode            |
|        | Parking | <i>n</i> -alkane standards | 35°C → 240°C with ramp rate 20°C/min and hold 2 min |
|        | Run-on  | blank vial                 | The same with perfume sample in on mode             |
| Set 10 | Parking | <i>n</i> -alkane standards | 35°C → 240°C with ramp rate 20°C/min and hold 4 min |
|        | Run-off | blank vial                 | The same with perfume sample in off mode            |

|               |         |                            |                                                      |
|---------------|---------|----------------------------|------------------------------------------------------|
|               | Parking | <i>n</i> -alkane standards | 35°C → 240°C with ramp rate 20°C/min and hold 4 min  |
|               | Run-on  | blank vial                 | The same with perfume sample in on mode              |
| <b>Set 11</b> | Parking | <i>n</i> -alkane standards | 35°C → 240°C with ramp rate 20°C/min and hold 6 min  |
|               | Run-off | blank vial                 | The same with perfume sample in off mode             |
|               | Parking | <i>n</i> -alkane standards | 35°C → 240°C with ramp rate 20°C/min and hold 6 min  |
|               | Run-on  | blank vial                 | The same with perfume sample in on mode              |
| <b>Set 12</b> | Parking | <i>n</i> -alkane standards | 35°C → 240°C with ramp rate 20°C/min and hold 8 min  |
|               | Run-off | blank vial                 | The same with perfume sample in off mode             |
|               | Parking | <i>n</i> -alkane standards | 35°C → 240°C with ramp rate 20°C/min and hold 8 min  |
|               | Run-on  | blank vial                 | The same with perfume sample in on mode              |
| <b>Set 13</b> | Parking | <i>n</i> -alkane standards | 35°C → 240°C with ramp rate 20°C/min and hold 10 min |
|               | Run-off | blank vial                 | The same with perfume sample in off mode             |
|               | Parking | <i>n</i> -alkane standards | 35°C → 240°C with ramp rate 20°C/min and hold 10 min |
|               | Run-on  | blank vial                 | The same with perfume sample in on mode              |
| <b>Set 14</b> | Parking | <i>n</i> -alkane standards | 35°C → 240°C with ramp rate 20°C/min and hold 12 min |
|               | Run-off | blank vial                 | The same with perfume sample in off mode             |
|               | Parking | <i>n</i> -alkane standards | 35°C → 240°C with ramp rate 20°C/min and hold 12 min |
|               | Run-on  | blank vial                 | The same with perfume sample in on mode              |
| <b>Set 15</b> | Parking | <i>n</i> -alkane standards | 35°C → 240°C with ramp rate 20°C/min and hold 14 min |
|               | Run-off | blank vial                 | The same with perfume sample in off mode             |
|               | Parking | <i>n</i> -alkane standards | 35°C → 240°C with ramp rate 20°C/min and hold 14 min |
|               | Run-on  | blank vial                 | The same with perfume sample in on mode              |
| <b>Set 16</b> | Parking | <i>n</i> -alkane standards | 35°C → 240°C with ramp rate 20°C/min and hold 16 min |
|               | Run-off | blank vial                 | The same with perfume sample in off mode             |
|               | Parking | <i>n</i> -alkane standards | 35°C → 240°C with ramp rate 20°C/min and hold 16 min |
|               | Run-on  | blank vial                 | The same with perfume sample in on mode              |

**Table S-3.** The fitting curve parameters of the isovolatility curves of *n*-alkanes.

| p1                              | p2                         | p3                       | p4                                          | p5        |
|---------------------------------|----------------------------|--------------------------|---------------------------------------------|-----------|
| -0.00385456                     | -0.61813                   | -26.47746735             | 5.555882                                    | -3.952407 |
| C7 (Experimental $^1t_R$ (min)) | Experimental $^1t_R$ (min) | Calculated $^2t_R$ (min) | Difference <sup>2</sup> (min <sup>2</sup> ) |           |
| 9.177                           | 2.307                      | 2.449                    | 0.020084                                    |           |
| 4.251                           | 2.264                      | 2.508                    | 0.059293                                    |           |
| 3.08                            | 2.286                      | 2.524                    | 0.0567                                      |           |
| 1.855                           | 2.234                      | 2.543                    | 0.095348                                    |           |
| 0.618                           | 2.28                       | 2.563                    | 0.080138                                    |           |

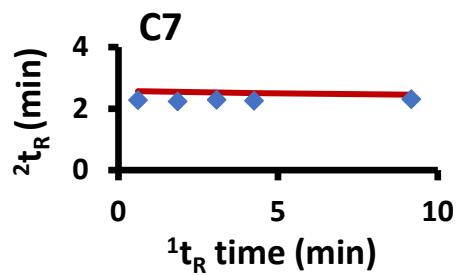

| p1                              | p2                         | p3                       | p4                                          | p5       |
|---------------------------------|----------------------------|--------------------------|---------------------------------------------|----------|
| -0.00385                        | -0.61813                   | -26.4775                 | 5.555882                                    | -3.95241 |
| C8 (Experimental $^1t_R$ (min)) | Experimental $^1t_R$ (min) | Calculated $^2t_R$ (min) | Difference <sup>2</sup> (min <sup>2</sup> ) |          |
| 11.396                          | 2.404                      | 2.529                    | 0.015683                                    |          |
| 7.497                           | 2.398                      | 2.595                    | 0.038875                                    |          |
| 6.252                           | 2.384                      | 2.620                    | 0.0556                                      |          |
| 4.857                           | 2.383                      | 2.650                    | 0.071183                                    |          |
| 3.358                           | 2.435                      | 2.685                    | 0.062597                                    |          |
| 1.882                           | 2.485                      | 2.724                    | 0.056935                                    |          |
| 0.454                           | 2.529                      | 2.765                    | 0.055486                                    |          |

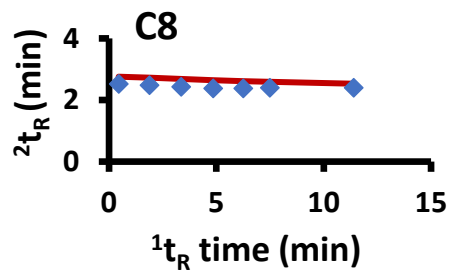

| p1                              | p2                         | p3                       | p4                                          | p5       |
|---------------------------------|----------------------------|--------------------------|---------------------------------------------|----------|
| -0.00385                        | -0.61813                   | -26.4775                 | 5.555882                                    | -3.95241 |
| C9 (Experimental $^1t_R$ (min)) | Experimental $^1t_R$ (min) | Calculated $^2t_R$ (min) | Difference <sup>2</sup> (min <sup>2</sup> ) |          |
| 14.545                          | 2.497                      | 2.607                    | 0.012017                                    |          |
| 11.912                          | 2.508                      | 2.663                    | 0.024083                                    |          |
| 10.769                          | 2.527                      | 2.691                    | 0.026861                                    |          |
| 9.377                           | 2.518                      | 2.728                    | 0.043919                                    |          |
| 7.788                           | 2.565                      | 2.774                    | 0.043609                                    |          |
| 6.108                           | 3.15                       | 2.828                    | 0.103364                                    |          |
| 4.363                           | 2.696                      | 2.892                    | 0.038596                                    |          |
| 2.111                           | 3.262                      | 2.988                    | 0.075274                                    |          |
| 0.85                            | 2.867                      | 3.048                    | 0.032811                                    |          |

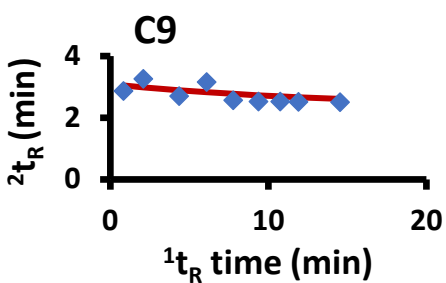

| p1                               | p2                         | p3                       | p4                                          | p5       |
|----------------------------------|----------------------------|--------------------------|---------------------------------------------|----------|
| -0.00385                         | -0.61813                   | -26.4775                 | 5.555881842                                 | -3.95241 |
| C10 (Experimental $^1t_R$ (min)) | Experimental $^1t_R$ (min) | Calculated $^2t_R$ (min) | Difference <sup>2</sup> (min <sup>2</sup> ) |          |
| 18.337                           | 2.602                      | 2.673                    | 0.005020066                                 |          |
| 16.779                           | 2.606                      | 2.712                    | 0.011274317                                 |          |
| 15.874                           | 2.619                      | 2.737                    | 0.013913933                                 |          |
| 14.664                           | 2.623                      | 2.773                    | 0.022357936                                 |          |
| 13.181                           | 2.664                      | 2.820                    | 0.024433453                                 |          |
| 11.513                           | 2.712                      | 2.880                    | 0.028313731                                 |          |
| 9.708                            | 2.786                      | 2.954                    | 0.028098746                                 |          |
| 7.62                             | 3.051                      | 3.051                    | 1.12627E-07                                 |          |
| 5.826                            | 3.007                      | 3.148                    | 0.019944698                                 |          |
| 1.751                            | 3.388                      | 3.425                    | 0.001337495                                 |          |

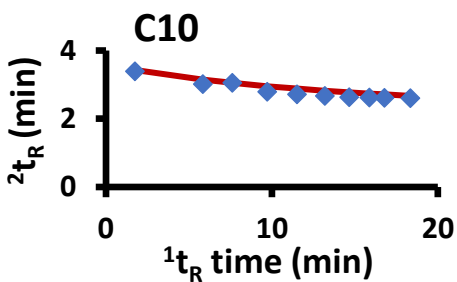

| p1                                                 | p2                         | p3                       | p4                                          | p5       |
|----------------------------------------------------|----------------------------|--------------------------|---------------------------------------------|----------|
| -0.00385                                           | -0.61813                   | -26.477467               | 5.555881842                                 | -3.95241 |
| <b>C11 (Experimental <math>^1t_R</math> (min))</b> | Experimental $^1t_R$ (min) | Calculated $^2t_R$ (min) | Difference <sup>2</sup> (min <sup>2</sup> ) |          |
| 22.397                                             | 2.69                       | 2.727                    | 0.001401442                                 |          |
| 21.549                                             | 2.683                      | 2.751                    | 0.004691942                                 |          |
| 20.912                                             | 2.698                      | 2.770                    | 0.005256092                                 |          |
| 19.961                                             | 2.703                      | 2.800                    | 0.009495367                                 |          |
| 18.692                                             | 2.732                      | 2.844                    | 0.012450379                                 |          |
| 17.167                                             | 2.773                      | 2.901                    | 0.016318598                                 |          |
| 15.447                                             | 2.836                      | 2.973                    | 0.018800886                                 |          |
| 13.543                                             | 2.95                       | 3.065                    | 0.013114085                                 |          |
| 11.587                                             | 3.022                      | 3.173                    | 0.022771187                                 |          |
| 7.532                                              | 3.382                      | 3.457                    | 0.00559798                                  |          |
| 1.587                                              | 4.631                      | 4.084                    | 0.299661613                                 |          |

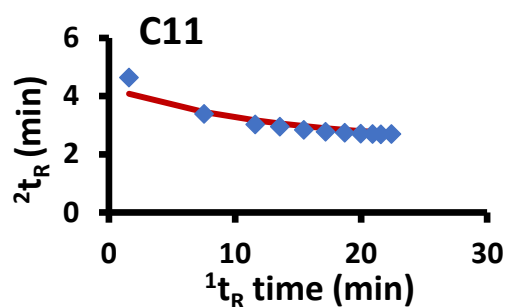

| p1                                                 | p2                         | p3                       | p4                                          | p5       |
|----------------------------------------------------|----------------------------|--------------------------|---------------------------------------------|----------|
| -0.00385                                           | -0.61813                   | -26.4775                 | 5.555882                                    | -3.95241 |
| <b>C12 (Experimental <math>^1t_R</math> (min))</b> | Experimental $^1t_R$ (min) | Calculated $^2t_R$ (min) | Difference <sup>2</sup> (min <sup>2</sup> ) |          |
| 26.465                                             | 2.767                      | 2.773                    | 3.92E-05                                    |          |
| 26.03                                              | 2.75                       | 2.787                    | 0.001354                                    |          |
| 25.612                                             | 2.767                      | 2.800                    | 0.001102                                    |          |
| 24.923                                             | 2.767                      | 2.823                    | 0.003151                                    |          |
| 23.907                                             | 2.792                      | 2.859                    | 0.004492                                    |          |
| 22.593                                             | 2.829                      | 2.909                    | 0.006465                                    |          |
| 21.011                                             | 2.875                      | 2.977                    | 0.010339                                    |          |
| 19.258                                             | 2.916                      | 3.061                    | 0.020979                                    |          |
| 17.302                                             | 3.03                       | 3.169                    | 0.019223                                    |          |
| 13.384                                             | 3.349                      | 3.440                    | 0.008263                                    |          |
| 8.413                                              | 4.09                       | 3.933                    | 0.024682                                    |          |



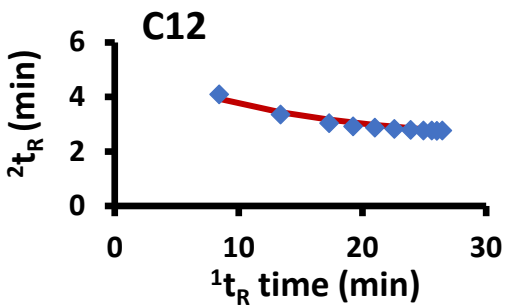

| p1                                                 | p2                         | p3                       | p4                                          | p5       |
|----------------------------------------------------|----------------------------|--------------------------|---------------------------------------------|----------|
| -0.00385                                           | -0.61813                   | -26.4775                 | 5.555882                                    | -3.95241 |
| <b>C13 (Experimental <math>^1t_R</math> (min))</b> | Experimental $^1t_R$ (min) | Calculated $^2t_R$ (min) | Difference <sup>2</sup> (min <sup>2</sup> ) |          |
| 30.416                                             | 2.832                      | 2.813                    | 0.000362                                    |          |
| 30.197                                             | 2.813                      | 2.820                    | 5.37E-05                                    |          |
| 29.947                                             | 2.82                       | 2.829                    | 7.88E-05                                    |          |
| 29.469                                             | 2.826                      | 2.846                    | 0.000386                                    |          |
| 28.703                                             | 2.849                      | 2.874                    | 0.00061                                     |          |
| 27.611                                             | 2.874                      | 2.916                    | 0.001799                                    |          |
| 26.22                                              | 2.92                       | 2.976                    | 0.003124                                    |          |
| 24.617                                             | 2.919                      | 3.052                    | 0.017774                                    |          |
| 22.724                                             | 3.05                       | 3.155                    | 0.011045                                    |          |
| 18.937                                             | 3.29                       | 3.411                    | 0.014698                                    |          |
| 14.514                                             | 3.821                      | 3.827                    | 3.45E-05                                    |          |
| 7.83                                               | 5.062                      | 4.842                    | 0.048537                                    |          |

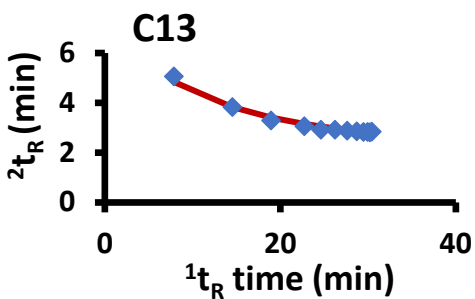

| p1                                                | p2                         | p3                       | p4                                          | p5       |
|---------------------------------------------------|----------------------------|--------------------------|---------------------------------------------|----------|
| -0.00385                                          | -0.61813                   | -26.4774674              | 5.555882                                    | -3.95241 |
| <b>14 (Experimental <math>^1t_R</math> (min))</b> | Experimental $^1t_R$ (min) | Calculated $^2t_R$ (min) | Difference <sup>2</sup> (min <sup>2</sup> ) |          |
| 34.207                                            | 2.889                      | 2.848                    | 0.001674                                    |          |
| 34.095                                            | 2.874                      | 2.852                    | 0.000479                                    |          |
| 33.946                                            | 2.881                      | 2.858                    | 0.000551                                    |          |
| 33.639                                            | 2.88                       | 2.869                    | 0.000124                                    |          |
| 33.086                                            | 2.901                      | 2.890                    | 0.000124                                    |          |

|        |       |       |          |  |
|--------|-------|-------|----------|--|
| 32.222 | 2.913 | 2.924 | 0.00013  |  |
| 31.035 | 2.953 | 2.976 | 0.000507 |  |
| 29.593 | 2.941 | 3.044 | 0.010569 |  |
| 27.798 | 3.067 | 3.140 | 0.005281 |  |
| 24.164 | 3.265 | 3.379 | 0.012977 |  |
| 20.097 | 3.656 | 3.743 | 0.007493 |  |
| 14.652 | 4.61  | 4.471 | 0.019421 |  |

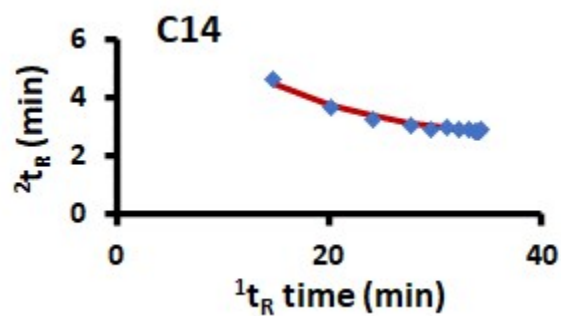

| p1                               | p2                         | p3                       | p4                                          | p5       |
|----------------------------------|----------------------------|--------------------------|---------------------------------------------|----------|
| -0.00385                         | -0.61813                   | -26.47746735             | 5.555882                                    | -3.95241 |
| C15 (Experimental $^1t_R$ (min)) | Experimental $^1t_R$ (min) | Calculated $^2t_R$ (min) | Difference <sup>2</sup> (min <sup>2</sup> ) |          |
| 37.831                           | 2.944                      | 2.879                    | 0.004161                                    |          |
| 37.785                           | 2.917                      | 2.881                    | 0.001278                                    |          |
| 37.689                           | 2.928                      | 2.885                    | 0.001856                                    |          |
| 37.503                           | 2.926                      | 2.892                    | 0.001148                                    |          |
| 37.112                           | 2.946                      | 2.908                    | 0.001478                                    |          |
| 36.459                           | 2.957                      | 2.934                    | 0.000515                                    |          |
| 35.485                           | 2.977                      | 2.977                    | 1.44E-07                                    |          |
| 34.213                           | 2.981                      | 3.037                    | 0.003091                                    |          |
| 32.563                           | 3.081                      | 3.123                    | 0.001788                                    |          |
| 29.096                           | 3.259                      | 3.345                    | 0.007391                                    |          |
| 25.33                            | 3.553                      | 3.665                    | 0.012615                                    |          |
| 20.789                           | 4.171                      | 4.211                    | 0.001604                                    |          |
| 12.765                           | 6.574                      | 5.921                    | 0.426483                                    |          |

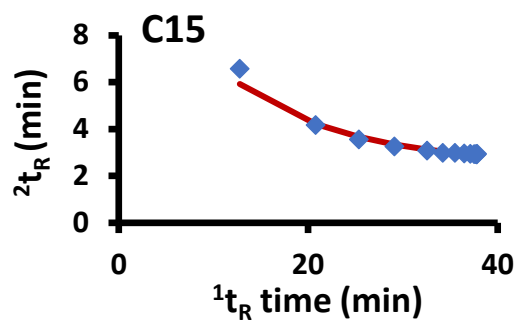

| p1                                                 | p2                         | p3                       | p4                                          | p5        |
|----------------------------------------------------|----------------------------|--------------------------|---------------------------------------------|-----------|
| -0.00385456                                        | -0.61813                   | -26.47746735             | 5.555882                                    | -3.952407 |
| <b>C16 (Experimental <math>^1t_R</math> (min))</b> | Experimental $^1t_R$ (min) | Calculated $^2t_R$ (min) | Difference <sup>2</sup> (min <sup>2</sup> ) |           |
| 41.312                                             | 2.985                      | 2.907                    | 0.006086                                    |           |
| 41.523                                             | 2.723                      | 2.899                    | 0.030839                                    |           |
| 41.234                                             | 2.971                      | 2.910                    | 0.003707                                    |           |
| 41.114                                             | 2.976                      | 2.915                    | 0.003726                                    |           |
| 40.859                                             | 2.979                      | 2.925                    | 0.002874                                    |           |
| 40.38                                              | 2.988                      | 2.946                    | 0.001805                                    |           |
| 39.604                                             | 3.007                      | 2.980                    | 0.000749                                    |           |
| 38.518                                             | 3.008                      | 3.031                    | 0.000517                                    |           |
| 37.032                                             | 3.083                      | 3.108                    | 0.000607                                    |           |
| 33.778                                             | 3.244                      | 3.309                    | 0.004288                                    |           |
| 30.311                                             | 3.473                      | 3.589                    | 0.013533                                    |           |
| 26.353                                             | 3.883                      | 4.023                    | 0.019497                                    |           |
| 21.007                                             | 4.944                      | 4.901                    | 0.001857                                    |           |

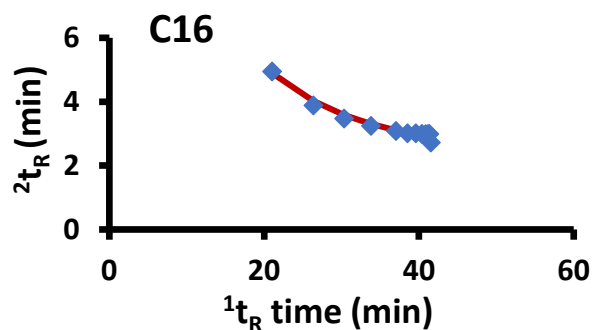

| p1                                                 | p2                         | p3                       | p4                                          | p5       |
|----------------------------------------------------|----------------------------|--------------------------|---------------------------------------------|----------|
| -0.00385                                           | -0.61813                   | -26.4775                 | 5.555882                                    | -3.95241 |
| <b>C17 (Experimental <math>^1t_R</math> (min))</b> | Experimental $^1t_R$ (min) | Calculated $^2t_R$ (min) | Difference <sup>2</sup> (min <sup>2</sup> ) |          |
| 44.67                                              | 3.026                      | 2.930                    | 0.009137                                    |          |
| 44.851                                             | 2.812                      | 2.923                    | 0.012303                                    |          |
| 44.627                                             | 3.007                      | 2.932                    | 0.005594                                    |          |
| 44.557                                             | 3.002                      | 2.935                    | 0.00447                                     |          |
| 44.379                                             | 3.01                       | 2.943                    | 0.004534                                    |          |
| 44.043                                             | 3.021                      | 2.957                    | 0.004079                                    |          |
| 43.437                                             | 3.042                      | 2.984                    | 0.003349                                    |          |
| 42.163                                             | 3.408                      | 3.045                    | 0.131816                                    |          |
| 41.226                                             | 3.102                      | 3.093                    | 7.3E-05                                     |          |
| 38.24                                              | 3.229                      | 3.273                    | 0.001942                                    |          |
| 35.08                                              | 3.409                      | 3.514                    | 0.011129                                    |          |
| 31.603                                             | 3.725                      | 3.862                    | 0.0188                                      |          |
| 27.433                                             | 4.309                      | 4.439                    | 0.01697                                     |          |

|        |       |       |          |  |
|--------|-------|-------|----------|--|
| 21.042 | 5.989 | 5.873 | 0.013437 |  |
|--------|-------|-------|----------|--|

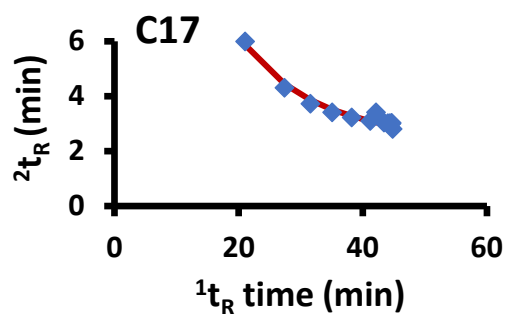

| p1                              | p2                         | p3                       | p4                                          | p5       |
|---------------------------------|----------------------------|--------------------------|---------------------------------------------|----------|
| -0.00385                        | -0.61813                   | -26.4775                 | 5.555882                                    | -3.95241 |
| C18(Experimental $^1t_R$ (min)) | Experimental $^1t_R$ (min) | Calculated $^2t_R$ (min) | Difference <sup>2</sup> (min <sup>2</sup> ) |          |
| 47.957                          | 3.079                      | 2.948                    | 0.017113                                    |          |
| 48.106                          | 2.909                      | 2.942                    | 0.001077                                    |          |
| 47.932                          | 3.074                      | 2.949                    | 0.015561                                    |          |
| 47.888                          | 3.069                      | 2.951                    | 0.013888                                    |          |
| 47.768                          | 3.06                       | 2.956                    | 0.010742                                    |          |
| 47.526                          | 3.072                      | 2.967                    | 0.011029                                    |          |
| 47.06                           | 3.073                      | 2.988                    | 0.007229                                    |          |
| 46.339                          | 3.064                      | 3.022                    | 0.001773                                    |          |
| 45.198                          | 3.113                      | 3.079                    | 0.001129                                    |          |
| 42.505                          | 3.209                      | 3.236                    | 0.000747                                    |          |
| 39.679                          | 3.35                       | 3.440                    | 0.008122                                    |          |
| 36.625                          | 3.584                      | 3.719                    | 0.018171                                    |          |
| 33.19                           | 3.964                      | 4.130                    | 0.027412                                    |          |
| 28.949                          | 4.666                      | 4.839                    | 0.029976                                    |          |
| 21.815                          | 7.041                      | 6.887                    | 0.023651                                    |          |

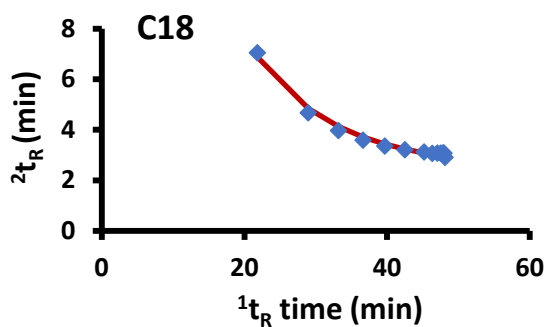

| p1                                                 | p2                         | p3                       | p4                                          | p5       |
|----------------------------------------------------|----------------------------|--------------------------|---------------------------------------------|----------|
| -0.00385                                           | -0.61813                   | -26.4775                 | 5.555881842                                 | -3.95241 |
| <b>C19 (Experimental <math>^1t_R</math> (min))</b> | Experimental $^1t_R$ (min) | Calculated $^2t_R$ (min) | Difference <sup>2</sup> (min <sup>2</sup> ) |          |
| 51.297                                             | 3.216                      | 2.955                    | 0.067920515                                 |          |
| 51.412                                             | 3.085                      | 2.950                    | 0.018115089                                 |          |
| 51.285                                             | 3.205                      | 2.956                    | 0.0620478                                   |          |
| 51.255                                             | 3.199                      | 2.957                    | 0.058461319                                 |          |
| 51.174                                             | 3.191                      | 2.961                    | 0.0530136044                                |          |
| 51.003                                             | 3.206                      | 2.968                    | 0.056502738                                 |          |
| 50.662                                             | 3.212                      | 2.984                    | 0.052156212                                 |          |
| 50.071                                             | 3.185                      | 3.011                    | 0.030240185                                 |          |
| 49.061                                             | 3.211                      | 3.061                    | 0.022524899                                 |          |
| 46.595                                             | 3.237                      | 3.200                    | 0.001401585                                 |          |
| 44.094                                             | 3.308                      | 3.370                    | 0.003797763                                 |          |
| 41.466                                             | 3.48                       | 3.588                    | 0.011769917                                 |          |
| 38.605                                             | 3.72                       | 3.887                    | 0.027796827                                 |          |
| 35.355                                             | 4.102                      | 4.326                    | 0.050142062                                 |          |
| 31.35                                              | 4.882                      | 5.073                    | 0.036586598                                 |          |
| 24.852                                             | 6.971                      | 7.079                    | 0.011609378                                 |          |

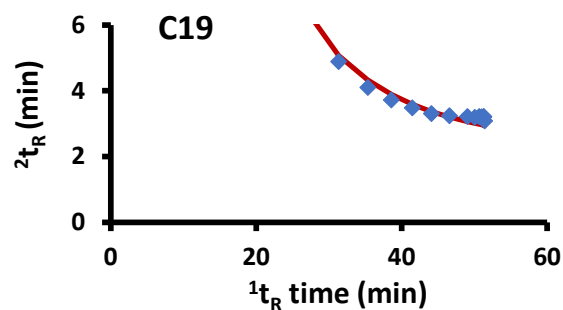

| p1                                                 | p2                         | p3                       | p4                                          | p5       |
|----------------------------------------------------|----------------------------|--------------------------|---------------------------------------------|----------|
| -0.00385                                           | -0.61813                   | -26.477467               | 5.555881842                                 | -3.95241 |
| <b>C20 (Experimental <math>^1t_R</math> (min))</b> | Experimental $^1t_R$ (min) | Calculated $^2t_R$ (min) | Difference <sup>2</sup> (min <sup>2</sup> ) |          |
| 54.668                                             | 3.4                        | 2.953                    | 0.199392299                                 |          |
| 54.657                                             | 3.386                      | 2.954                    | 0.18667323                                  |          |
| 54.643                                             | 3.381                      | 2.955                    | 0.181859391                                 |          |
| 54.59                                              | 3.392                      | 2.957                    | 0.18935153                                  |          |
| 54.471                                             | 3.385                      | 2.962                    | 0.178877604                                 |          |
| 54.223                                             | 3.365                      | 2.973                    | 0.153620255                                 |          |
| 53.741                                             | 3.348                      | 2.995                    | 0.124608823                                 |          |
| 52.908                                             | 3.398                      | 3.035                    | 0.131916646                                 |          |
| 50.746                                             | 3.387                      | 3.150                    | 0.056015542                                 |          |
| 48.442                                             | 3.385                      | 3.296                    | 0.00789093                                  |          |
| 46.131                                             | 3.401                      | 3.471                    | 0.004940149                                 |          |
| 43.726                                             | 3.556                      | 3.692                    | 0.018364573                                 |          |

|        |       |       |             |  |
|--------|-------|-------|-------------|--|
| 41.121 | 3.791 | 3.985 | 0.037668597 |  |
| 38.224 | 4.172 | 4.398 | 0.051251698 |  |
| 34.767 | 4.759 | 5.053 | 0.086593158 |  |
| 29.883 | 6.18  | 6.425 | 0.059844886 |  |

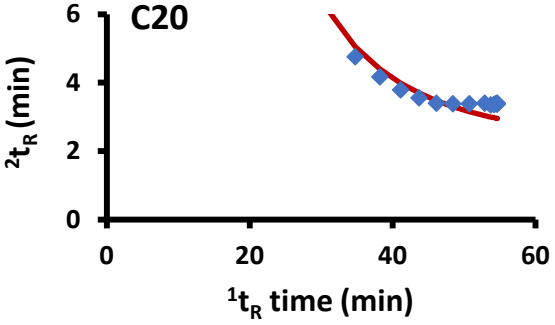

**Table S-4.**  $^2I$  profile of standard compounds compared with the literature data.

| Standard compound | Class            | $^1t_R$ (min) | $^2t_R$ (min) | $^2I_{Cal}$ | $^2I_{Lit}$ | $^2I_{Lit}-^2I_{Cal}$ |
|-------------------|------------------|---------------|---------------|-------------|-------------|-----------------------|
| Propanal          | Aldehyde         | 8.6           | 3.5           | 831         | 799         | -32                   |
| Methyl propanoate | Ester            | 10.8          | 3.8           | 922         | 905         | -17                   |
| Methanol          | Alcohol          | 12            | 3.5           | 882         | 894         | 11                    |
| 2-Pentanone       | Ketone           | 13.4          | 4.2           | 1016        | 981         | -35                   |
| Hydroxyacetone    | Alcohol & ketone | 13.6          | 11.8          | 1285        | 1276        | -9                    |
| 3-Pentanone       | Ketone           | 13.8          | 4.2           | 1015        | 980         | -35                   |
| Propyl acetate    | Ester            | 15.2          | 3.8           | 992         | 973         | -19                   |
| Hexanal           | Aldehyde         | 15.4          | 4.2           | 1042        | 1083        | 41                    |
| 2-Hexanone        | Ketone           | 20.4          | 3.9           | 1098        | 1106        | 7                     |
| Methyl pentanoate | Ester            | 22.2          | 3.6           | 1079        | 1085        | 6                     |
