# Supplementary material for: A multi-location peak parking approach for calculation of second dimensional retention indices for improved volatile compound identification with cryogen-free comprehensive heart-cut two-dimensional gas chromatography
Source: Royal Society of Chemistry journal article supplement (doi:10.1039/d0ay01976c), 2020-12-15
Supplement: d0ay01976c2.xlsx [file d0ay01976c2.xlsx]

## Sheet: OKestimated (2)
																			Analysis time (h)	25	10	5	4	2	1		83.3333			0.119048		11.9048					0.2	15.3846		0.2	7.27273	0.2	0.5	1	1.25	2.5
														Input H/C window			2		H/C window (min)	0.2	0.5	1	1.25	2.5	5		26.0274	11										23.1128			13.8017	7.27273	18.1818	36.3636	45.4545	90.9091
		No.	Name	Retention time (min)			Retention index (I)			Match score		Area* (x107)		5				3.57143	# separated peaks	84	84	84	83	81	74			21		0.912698		91.2698					0.5	38.4615		0.5	18.1818	13.8017	34.8606	73.7844	95.9531	318.014
				1tR+2tR	1tR	2tR	Exper-iment	Litera-ture	Differ-ence	Match	R match		68			0		87.6712	Total peak capacity	9198	6060	2958	2296	1134	583			41		0.273973		27.3973						60.1684			34.8606
		1	Tetrahydrofuran	15.32	10.4	4.92							1	12.5	2.8	10	NA	83.3333	1nc	126	101	51	41	21	11	NA	NA	51	NA		NA	NA	NA	NA	NA	NA	1	76.9231	NA	1	36.3636	NA	NA	NA	NA	NA	NA	NA	NA
		2	2-Butanone	17.48	12.9	4.58							1	17.5	0	0.6	4	26.0274	2nc	73	60	58	56	54	53	NA	NA	101	NA		NA	NA	NA	NA	NA	NA		130.348	NA		73.7844	NA	NA	NA	NA	NA	NA	NA	NA
		3	2-Butenal	18.14	14.6	3.54							1	17.5	0.6	3.4	0.6	NA	1I error	7.27273	18.1818	36.3636	45.4545	90.9091		NA	NA	126	NA		NA	NA	NA	NA	NA	NA	1.25	95.9057	NA	1.25	45.4545	NA	NA	NA	NA	NA	NA	NA	NA
		4	2-Butenal, (E)-	21.49	15.9	5.59							1	17.5	4	2.8	NA	NA	2I error	13.8017	34.8606	73.7844	95.9531	318.014		NA	NA	NA	NA		NA	NA	NA	NA	NA	NA		170.368	NA		95.9531	NA	NA	NA	NA	NA	NA	NA	NA
		5	1-Butanol	18.73	16	2.73							1	17.5	1.2	10	NA	NA	NA	NA	NA	NA	NA	NA	NA	NA	NA	NA	NA		NA	NA	NA	NA	NA	NA	2.5	189.874	NA	2.5	90.9091	NA	NA	NA	NA	NA	NA	NA	NA
		6	2-Pentanone	20.66	17.6	3.06							0	22.5	-1.8	0.1	0.7	2.2	8.2	1.8	1.9	7.5	2.3	9.6	3	4	6.1	4.7	5.5	5.6	5.2	10.4	NA	NA	NA	NA		617.57	NA		318.014	NA	NA	NA	NA	NA	NA	NA	NA
		7	3-Pentanol	20.58	17.7	2.88							1	22.5	-1.9	0.8	2.3	8.3	1.9	2	7.6	2.4	9.7	3.1	4.1	6.2	4.8	5.6	5.7	5.3	10.5	NA	NA	NA	NA	NA	5	390.47	NA	NA	NA	NA	NA	NA	NA	NA	NA	NA	NA
		8	2-Butanol, 3-methyl-	21.36	17.9	3.46							1	22.5	-1.1	1.5	7.5	1.1	1.2	6.8	1.6	8.9	2.3	3.3	5.4	4	4.8	4.9	4.5	9.7	NA	NA	NA	NA	NA	NA		2046.91	NA	NA	NA	NA	NA	NA	NA	NA	NA	NA	NA
		9	2-Butenenitrile	22.93	18.5	4.43							0	22.5	0.4	6	0.4	0.3	5.3	0.1	7.4	0.8	1.8	3.9	2.5	3.3	3.4	3	8.2	NA	NA	NA	NA	NA	NA	NA	NA	NA	NA	NA	NA	NA	NA	NA	NA	NA	NA	NA	NA
		10	Pentanal	28.9	18.7	10.2							1	22.5	6.4	6.4	6.3	0.7	5.9	1.4	5.2	4.2	2.1	3.5	2.7	2.6	3	2.2	NA	NA	NA	NA	NA	NA	NA	NA	NA	NA	NA	NA	NA	NA	NA	NA	NA	NA	NA	NA	NA
		11	2-Pentanol	22.54	19.5	3.04							0	22.5	0	0.1	5.7	0.5	7.8	1.2	2.2	4.3	2.9	3.7	3.8	3.4	8.6	NA	NA	NA	NA	NA	NA	NA	NA	NA	NA	NA	NA	NA	NA	NA	NA	NA	NA	NA	NA	NA	NA
		12	Cyclopentanol	22.64	19.5	3.14							1	22.5	0.1	5.6	0.4	7.7	1.1	2.1	4.2	2.8	3.6	3.7	3.3	8.5	NA	NA	NA	NA	NA	NA	NA	NA	NA	NA	NA	NA	NA	NA	NA	NA	NA	NA	NA	NA	NA	NA	NA
		13	3-Penten-2-one	28.21	19.8	8.41							1	22.5	5.7	5.2	2.1	4.5	3.5	1.4	2.8	2	1.9	2.3	2.9	NA	NA	NA	NA	NA	NA	NA	NA	NA	NA	NA	NA	NA	NA	NA	NA	NA	NA	NA	NA	NA	NA	NA	NA
		14	1-Butanol, 3-methyl-	23.02	19.9	3.12							1	22.5	0.5	7.3	0.7	1.7	3.8	2.4	3.2	3.3	2.9	8.1	NA	NA	NA	NA	NA	NA	NA	NA	NA	NA	NA	NA	NA	NA	NA	NA	NA	NA	NA	NA	NA	NA	NA	NA	NA
		15	Methyl Isobutyl Ketone	30.31	19.9	10.41							1	22.5	7.8	6.6	5.6	3.5	4.9	4.1	4	4.4	0.8	NA	NA	NA	NA	NA	NA	NA	NA	NA	NA	NA	NA	NA	NA	NA	NA	NA	NA	NA	NA	NA	NA	NA	NA	NA	NA
		16	2-Butenal, 2-methyl-	23.69	20.6	3.09							1	22.5	1.2	1	3.1	1.7	2.5	2.6	2.2	7.4	NA	NA	NA	NA	NA	NA	NA	NA	NA	NA	NA	NA	NA	NA	NA	NA	NA	NA	NA	NA	NA	NA	NA	NA	NA	NA	NA
		17	3-Penten-2-one, (E)-	24.65	20.7	3.95							1	22.5	2.2	2.1	0.7	1.5	1.6	1.2	6.4	NA	NA	NA	NA	NA	NA	NA	NA	NA	NA	NA	NA	NA	NA	NA	NA	NA	NA	NA	NA	NA	NA	NA	NA	NA	NA	NA	NA
NN work		18	2-Pentanone, 3-methyl-	26.81	21.3	5.51							1	22.5	4.3	1.4	0.6	0.5	0.9	4.3	NA	NA	NA	NA	NA	NA	NA	NA	NA	NA	NA	NA	NA	NA	NA	NA	NA	NA	NA	NA	NA	NA	NA	NA	NA	NA	NA	NA	NA
		19	2-Pentenal, (E)-	25.35	21.33	4.02							1	22.5	2.9	0.8	0.9	0.5	5.7	NA	NA	NA	NA	NA	NA	NA	NA	NA	NA	NA	NA	NA	NA	NA	NA	NA	NA	NA	NA	NA	NA	NA	NA	NA	NA	NA	NA	NA	NA
5	0.0947	20	Pyridine	26.19	21.9	4.29							0	22.5	3.7	0.1	0.3	4.9	NA	NA	NA	NA	NA	NA	NA	NA	NA	NA	NA	NA	NA	NA	NA	NA	NA	NA	NA	NA	NA	NA	NA	NA	NA	NA	NA	NA	NA	NA	NA
2.5	0.0935	21	1-Pentanol	26.34	22.2	4.14							1	22.5	3.8	0.4	4.8	NA	NA	NA	NA	NA	NA	NA	NA	NA	NA	NA	NA	NA	NA	NA	NA	NA	NA	NA	NA	NA	NA	NA	NA	NA	NA	NA	NA	NA	NA	NA	NA
1.25	0.0904	22	Toluene	25.85	22.4	3.45							1	22.5	3.4	5.2	NA	NA	NA	NA	NA	NA	NA	NA	NA	NA	NA	NA	NA	NA	NA	NA	NA	NA	NA	NA	NA	NA	NA	NA	NA	NA	NA	NA	NA	NA	NA	NA	NA
1	0.0876	23	3,5-Hexadien-2-ol	31.08	22.5	8.58							1	22.5	8.6	10	NA	NA	NA	NA	NA	NA	NA	NA	NA	NA	NA	NA	NA	NA	NA	NA	NA	NA	NA	NA	NA	NA	NA	NA	NA	NA	NA	NA	NA	NA	NA	NA	NA
0.5	0.0843	24	Pentanenitrile	27.37	22.8	4.57							1	27.5	-0.1	0.2	2.6	1.2	2.2	0.8	2.1	5.1	2.2	2.4	2.8	4	2.7	3.2	3.4	4.4	4.7	5.1	NA	NA	NA	NA	NA	NA	NA	NA	NA	NA	NA	NA	NA	NA	NA	NA	NA
0.2	0.0694	25	3-Hexanone	27.2	23.2	4							1	27.5	-0.3	2.8	1.4	2.4	1	2.3	5.3	2.4	2.6	3	4.2	2.9	3.4	3.6	4.6	4.9	5.3	NA	NA	NA	NA	NA	NA	NA	NA	NA	NA	NA	NA	NA	NA	NA	NA	NA	NA
		26	2-Hexanone	30.02	23.6	6.42							0	27.5	2.5	1.4	0.4	1.8	0.5	2.5	0.4	0.2	0.2	1.4	0.1	0.6	0.8	1.8	2.1	2.5	NA	NA	NA	NA	NA	NA	NA	NA	NA	NA	NA	NA	NA	NA	NA	NA	NA	NA	NA
	0	27	1-Penten-3-one, 2-methyl-	28.55	23.8	4.75							1	27.5	1.1	1	0.4	0.9	3.9	1	1.2	1.6	2.8	1.5	2	2.2	3.2	3.5	3.9	NA	NA	NA	NA	NA	NA	NA	NA	NA	NA	NA	NA	NA	NA	NA	NA	NA	NA	NA	NA
		28	3-Penten-2-one, 4-methyl-	29.6	23.9	5.7							0	27.5	2.1	1.4	0.1	2.9	0	0.2	0.6	1.8	0.5	1	1.2	2.2	2.5	2.9	NA	NA	NA	NA	NA	NA	NA	NA	NA	NA	NA	NA	NA	NA	NA	NA	NA	NA	NA	NA	NA
		29	5-Hexen-2-one	28.19	24.4	3.79							1	27.5	0.7	1.3	4.3	1.4	1.6	2	3.2	1.9	2.4	2.6	3.6	3.9	4.3	NA	NA	NA	NA	NA	NA	NA	NA	NA	NA	NA	NA	NA	NA	NA	NA	NA	NA	NA	NA	NA	NA
		30	3-Hexanol	29.52	24.5	5.02							0	27.5	2	3	0.1	0.3	0.7	1.9	0.6	1.1	1.3	2.3	2.6	3	NA	NA	NA	NA	NA	NA	NA	NA	NA	NA	NA	NA	NA	NA	NA	NA	NA	NA	NA	NA	NA	NA	NA
		31	Cyclopentanone	32.45	25	7.45							0	27.5	5	2.9	2.7	2.3	1.1	2.4	1.9	1.7	0.7	0.4	0	NA	NA	NA	NA	NA	NA	NA	NA	NA	NA	NA	NA	NA	NA	NA	NA	NA	NA	NA	NA	NA	NA	NA	NA
		32	2H-Pyran, tetrahydro-2-methyl-	29.63	25.1	4.53							1	27.5	2.1	0.2	0.6	1.8	0.5	1	1.2	2.2	2.5	2.9	NA	NA	NA	NA	NA	NA	NA	NA	NA	NA	NA	NA	NA	NA	NA	NA	NA	NA	NA	NA	NA	NA	NA	NA	NA
		33	Hexanal	29.76	25.2	4.56							1	27.5	2.3	0.4	1.6	0.3	0.8	1	2	2.3	2.7	NA	NA	NA	NA	NA	NA	NA	NA	NA	NA	NA	NA	NA	NA	NA	NA	NA	NA	NA	NA	NA	NA	NA	NA	NA	NA
		34	3-Hexen-2-one(RI=811)	30.2	25.2	5							0	27.5	2.7	1.2	0.1	0.4	0.6	1.6	1.9	2.3	NA	NA	NA	NA	NA	NA	NA	NA	NA	NA	NA	NA	NA	NA	NA	NA	NA	NA	NA	NA	NA	NA	NA	NA	NA	NA	NA
		35	3-Penten-2-one, 3-methyl-	31.41	25.5	5.91							1	27.5	3.9	1.3	0.8	0.6	0.4	0.7	1.1	NA	NA	NA	NA	NA	NA	NA	NA	NA	NA	NA	NA	NA	NA	NA	NA	NA	NA	NA	NA	NA	NA	NA	NA	NA	NA	NA	NA
		36	2-Hexanol	30.1	25.7	4.4							1	27.5	2.6	0.5	0.7	1.7	2	2.4	NA	NA	NA	NA	NA	NA	NA	NA	NA	NA	NA	NA	NA	NA	NA	NA	NA	NA	NA	NA	NA	NA	NA	NA	NA	NA	NA	NA	NA
		37	Cyclotrisiloxane, hexamethyl-	30.55	25.7	4.85							1	27.5	3.1	0.2	1.2	1.5	1.9	NA	NA	NA	NA	NA	NA	NA	NA	NA	NA	NA	NA	NA	NA	NA	NA	NA	NA	NA	NA	NA	NA	NA	NA	NA	NA	NA	NA	NA	NA
		38	2-Pentenal, 2-methyl-	30.78	26	4.78							1	27.5	3.3	1	1.3	1.7	NA	NA	NA	NA	NA	NA	NA	NA	NA	NA	NA	NA	NA	NA	NA	NA	NA	NA	NA	NA	NA	NA	NA	NA	NA	NA	NA	NA	NA	NA	1.5
		39	4-Hexen-3-one	31.81	27	4.81							1	27.5	4.3	0.3	0.7	NA	NA	NA	NA	NA	NA	NA	NA	NA	NA	NA	NA	NA	NA	NA	NA	NA	NA	NA	NA	NA	NA	NA	NA	NA	NA	NA	NA	NA	NA	0.5	NA
		40	2-Pentanone, 3-ethyl-	32.12	27.1	5.02							1	27.5	4.6	0.4	NA	NA	NA	NA	NA	NA	NA	NA	NA	NA	NA	NA	NA	NA	NA	NA	NA	NA	NA	NA	NA	NA	NA	NA	NA	NA	NA	NA	NA	NA	0.2	NA	NA
		41	Cyclopentanone, 2-methyl-	32.52	27.3	5.22							1	27.5	5	10	NA	NA	NA	NA	NA	NA	NA	NA	NA	NA	NA	NA	NA	NA	NA	NA	NA	NA	NA	NA	NA	NA	NA	NA	NA	NA	NA	NA	NA	0.2	NA	NA	NA
		42	3-Hexen-2-one(RI=845)	33.1	27.6	5.5							1	32.5	0.6	0.3	1.4	0.2	1.7	1	1.1	6.9	4.7	2.1	6.2	NA	NA	NA	NA	NA	NA	NA	NA	NA	NA	NA	NA	NA	NA	NA	NA	NA	NA	NA	NA	NA	NA	NA	NA
		43	2-Cyclopenten-1-one	33.38	28.1	5.28							1	32.5	0.9	1.7	0.5	1.4	0.7	0.8	6.6	4.4	1.8	5.9	NA	NA	NA	NA	NA	NA	NA	NA	NA	NA	NA	NA	NA	NA	NA	NA	NA	NA	NA	NA	NA	NA	NA	NA	NA
		44	2-Hexanone, 3-methyl-	31.68	28.1	3.58							1	32.5	-0.8	1.2	3.1	2.4	2.5	8.3	6.1	3.5	7.6	NA	NA	NA	NA	NA	NA	NA	NA	NA	NA	NA	NA	NA	NA	NA	NA	NA	NA	NA	NA	NA	NA	NA	NA	NA	NA
		45	2-Hexanone, 4-methyl-	32.93	28.3	4.63							1	32.5	0.4	1.9	1.2	1.3	7.1	4.9	2.3	6.4	NA	NA	NA	NA	NA	NA	NA	NA	NA	NA	NA	NA	NA	NA	NA	NA	NA	NA	NA	NA	NA	NA	NA	NA	NA	NA	NA
		46	Cyclopentanone, 3-methyl-	34.82	28.8	6.02							1	32.5	2.3	0.7	0.6	5.2	3	0.4	4.5	NA	NA	NA	NA	NA	NA	NA	NA	NA	NA	NA	NA	NA	NA	NA	NA	NA	NA	NA	NA	NA	NA	NA	NA	NA	NA	NA	NA
		47	2-Hexanone, 5-methyl-	34.13	29.2	4.93							0	32.5	1.6	0.1	5.9	3.7	1.1	5.2	NA	NA	NA	NA	NA	NA	NA	NA	NA	NA	NA	NA	NA	NA	NA	NA	NA	NA	NA	NA	NA	NA	NA	NA	NA	NA	NA	NA	NA
		48	2-Hexenal, (E)-	34.16	29.4	4.76							1	32.5	1.7	5.8	3.6	1	5.1	NA	NA	NA	NA	NA	NA	NA	NA	NA	NA	NA	NA	NA	NA	NA	NA	NA	NA	NA	NA	NA	NA	NA	NA	NA	NA	NA	NA	NA	NA
		49	2-Furanmethanol, tetrahydro-	39.95	31	8.95							1	32.5	7.5	2.2	4.8	0.7	NA	NA	NA	NA	NA	NA	NA	NA	NA	NA	NA	NA	NA	NA	NA	NA	NA	NA	NA	NA	NA	NA	NA	NA	NA	NA	NA	NA	NA	NA	NA
		50	Benzene, 1,3-dimethyl-	37.84	31.4	6.44							1	32.5	5.3	2.6	1.5	NA	NA	NA	NA	NA	NA	NA	NA	NA	NA	NA	NA	NA	NA	NA	NA	NA	NA	NA	NA	NA	NA	NA	NA	NA	NA	NA	NA	NA	NA	NA	NA
		51	1-Hexanol	35.21	31.5	3.71							1	32.5	2.7	4.1	NA	NA	NA	NA	NA	NA	NA	NA	NA	NA	NA	NA	NA	NA	NA	NA	NA	NA	NA	NA	NA	NA	NA	NA	NA	NA	NA	NA	NA	NA	NA	NA	NA
		52	Furan, tetrahydro-2-(methoxymethyl)-	39.27	31.8	7.47							1	32.5	6.8	10	NA	NA	NA	NA	NA	NA	NA	NA	NA	NA	NA	NA	NA	NA	NA	NA	NA	NA	NA	NA	NA	NA	NA	NA	NA	NA	NA	NA	NA	NA	NA	NA	NA
		53	4-Heptanone	36.62	32.7	3.92							0	37.5	-0.9	0.5	1.9	4.4	2.2	5	3	4.4	3.7	4.8	4.5	NA	NA	NA	NA	NA	NA	NA	NA	NA	0.1	3.8	4	NA	NA	NA	NA	NA	NA	NA	NA	NA	NA	NA	NA
		54	5-Hepten-2-one	37.15	33	4.15							1	37.5	-0.4	1.4	3.9	1.7	4.5	2.5	3.9	3.2	4.3	4	NA	NA	NA	NA	NA	NA	NA	NA	NA	0.6	3.3	3.5	NA	NA	NA	NA	NA	NA	NA	NA	NA	NA	NA	NA	NA
		55	Hexanenitrile	38.49	33.2	5.29							1	37.5	1	2.5	0.3	3.1	1.1	2.5	1.8	2.9	2.6	NA	NA	NA	NA	NA	NA	NA	NA	NA	2	1.9	2.1	NA	NA	NA	NA	NA	NA	NA	NA	NA	NA	NA	NA	NA	NA
		56	2,4-Hexadienal, (E,E)-	41	34.7	6.3							0	37.5	3.5	2.2	0.6	1.4	0	0.7	0.4	0.1	NA	NA	NA	NA	NA	NA	NA	NA	NA	4.5	0.6	0.4	NA	NA	NA	NA	NA	NA	NA	NA	NA	NA	NA	NA	NA	NA	NA
		57	3-Heptanone	38.8	34.8	4							1	37.5	1.3	2.8	0.8	2.2	1.5	2.6	2.3	NA	NA	NA	NA	NA	NA	NA	NA	NA	2.3	1.6	1.8	NA	NA	NA	NA	NA	NA	NA	NA	NA	NA	NA	NA	NA	NA	NA	NA
		58	Cyclohexanol, 1-methyl-	41.59	35.4	6.19							1	37.5	4.1	2	0.6	1.3	0.2	0.5	NA	NA	NA	NA	NA	NA	NA	NA	NA	5.1	1.2	1	NA	NA	NA	NA	NA	NA	NA	NA	NA	NA	NA	NA	NA	NA	NA	NA	NA
		59	Cyclooctane	39.57	36	3.57							1	37.5	2.1	1.4	0.7	1.8	1.5	NA	NA	NA	NA	NA	NA	NA	NA	NA	3.1	0.8	1	NA	NA	NA	NA	NA	NA	NA	NA	NA	NA	NA	NA	NA	NA	NA	NA	NA	NA
		60	Cyclohexane, 1,2-dimethyl-, cis-	40.96	36.3	4.66							0	37.5	3.5	0.7	0.4	0.1	NA	NA	NA	NA	NA	NA	NA	NA	NA	4.5	0.6	0.4	NA	NA	NA	NA	NA	NA	NA	NA	NA	NA	NA	NA	NA	NA	NA	NA	NA	NA	NA
		61	Cyclohexanol	40.33	36.8	3.53							0	37.5	2.8	1.1	0.8	NA	NA	NA	NA	NA	NA	NA	NA	NA	3.8	0.1	0.3	NA	NA	NA	NA	NA	NA	NA	NA	NA	NA	NA	NA	NA	NA	NA	NA	NA	NA	NA	NA
		62	2-Heptanone	41.37	36.9	4.47							1	37.5	3.9	0.3	NA	NA	NA	NA	NA	NA	NA	NA	NA	4.9	1	0.8	NA	NA	NA	NA	NA	NA	NA	NA	NA	NA	NA	NA	NA	NA	NA	NA	NA	NA	NA	NA	NA
		63	Cyclopentanone, 2,5-dimethyl-	41.07	37	4.07							1	37.5	3.6	10	NA	NA	NA	NA	NA	NA	NA	NA	4.6	0.7	0.5	NA	NA	NA	NA	NA	NA	NA	NA	NA	NA	NA	NA	NA	NA	NA	NA	NA	NA	NA	NA	NA	NA
		64	2-Hexenal, 2-methyl-	42.34	38.2	4.14							1	42.5	-0.2	1.1	0.8	2.2	1.5	4.1	5.1	NA	NA	NA	NA	NA	0.6	4.2	5.8	0.9	NA	NA	6.9	NA	NA	NA	NA	NA	NA	NA	NA	NA	NA	NA	NA	NA	NA	NA	NA
		65	3-Hexen-2-one, 5-methyl-	43.4	38.7	4.7							1	42.5	0.9	0.3	1.1	0.4	3	4	NA	NA	NA	NA	NA	0.5	3.1	4.7	0.2	NA	NA	5.8	NA	NA	NA	NA	NA	NA	NA	NA	NA	NA	NA	NA	NA	NA	NA	NA	NA
		66	3-Heptanol	43.07	38.9	4.17							0	42.5	0.6	1.4	0.7	3.3	4.3	NA	NA	NA	NA	NA	0.2	3.4	5	0.1	NA	NA	6.1	NA	NA	NA	NA	NA	NA	NA	NA	NA	NA	NA	NA	NA	NA	NA	NA	NA	NA
		67	2-Heptanol	44.53	39.3	5.23							1	42.5	2	0.7	1.9	2.9	NA	NA	NA	NA	NA	1.6	2	3.6	1.3	NA	NA	4.7	NA	NA	NA	NA	NA	NA	NA	NA	NA	NA	NA	NA	NA	NA	NA	NA	NA	NA	NA
		68	Cyclohexanone	43.84	39.6	4.24							1	42.5	1.3	2.6	3.6	NA	NA	NA	NA	NA	0.9	2.7	4.3	0.6	NA	NA	5.4	NA	NA	NA	NA	NA	NA	NA	NA	NA	NA	NA	NA	NA	NA	NA	NA	NA	NA	NA	NA
		69	4-Cyclopentene-1,3-dione	46.36	39.9	6.46							0	42.5	3.9	1	NA	NA	NA	NA	NA	3.5	0.1	1.7	3.2	NA	NA	2.8	NA	NA	NA	NA	NA	NA	NA	NA	NA	NA	NA	NA	NA	NA	NA	NA	NA	NA	NA	NA	NA
		70	2-Propyltetrahydropyran	47.39	42.2	5.19							1	42.5	4.9	10	NA	NA	NA	NA	4.5	0.9	0.7	4.2	NA	NA	1.8	NA	NA	NA	NA	NA	NA	NA	NA	NA	NA	NA	NA	NA	NA	NA	NA	NA	NA	NA	NA	NA	NA
		71	Heptanal	48.32	43.3	5.02							1	47.5	0.8	10	NA	NA	NA	NA	NA	NA	NA	0.7	NA	NA	5.3	NA	NA	NA	NA	NA	NA	NA	NA	NA	NA	NA	NA	NA	NA	NA	NA	NA	NA	NA	NA	NA	NA
		72	2-Cyclopenten-1-one, 2-methyl-	32.3	23.8	8.5							1	27.5	4.8	10	NA	NA	NA	NA	NA	NA	NA	NA	NA	NA	NA	NA	NA	NA	NA	NA	NA	NA	NA	NA	NA	NA	NA	NA	NA	NA	NA	NA	NA	NA	NA	NA	NA
		73	Deltacyclene	36.52	32.7	3.82							1	37.5	-1	3.9	4.1	NA	NA	NA	NA	NA	NA	NA	NA	NA	NA	NA	NA	NA	NA	NA	NA	NA	NA	NA	NA	NA	NA	NA	NA	NA	NA	NA	NA	NA	NA	NA	NA
		74	2(5H)-Furanone, 5,5-dimethyl-	40.37	35.2	5.17							1	37.5	2.9	0.2	NA	NA	NA	NA	NA	NA	NA	NA	NA	NA	NA	NA	NA	NA	NA	NA	NA	NA	NA	NA	NA	NA	NA	NA	NA	NA	NA	NA	NA	NA	NA	NA	NA
		75	Anisole	40.56	35.7	4.86							1	37.5	3.1	10	NA	NA	NA	NA	NA	NA	NA	NA	NA	NA	NA	NA	NA	NA	NA	NA	NA	NA	NA	NA	NA	NA	NA	NA	NA	NA	NA	NA	NA	NA	NA	NA	NA
		76	4-Oxohex-2-enal	42.89	38.1	4.79							1	42.5	0.4	3.6	5.2	0.3	NA	NA	6.3	NA	NA	NA	NA	NA	NA	NA	NA	NA	NA	NA	NA	NA	NA	NA	NA	NA	NA	NA	NA	NA	NA	NA	NA	NA	NA	NA	NA
		77	Ethanone, 1-cyclopentyl-	46.5	39	7.5							1	42.5	4	1.6	3.3	NA	NA	2.7	NA	NA	NA	NA	NA	NA	NA	NA	NA	NA	NA	NA	NA	NA	NA	NA	NA	NA	NA	NA	NA	NA	NA	NA	NA	NA	NA	NA	NA
		78	3-Hepten-2-one	48.06	39	9.06							1	42.5	5.6	4.9	NA	NA	1.1	NA	NA	NA	NA	NA	NA	NA	NA	NA	NA	NA	NA	NA	NA	NA	NA	NA	NA	NA	NA	NA	NA	NA	NA	NA	NA	NA	NA	NA	NA
		79	2-Cyclohexen-1-one	43.23	39.1	4.13							1	42.5	0.7	10	NA	6	NA	NA	NA	NA	NA	NA	NA	NA	NA	NA	NA	NA	NA	NA	NA	NA	NA	NA	NA	NA	NA	NA	NA	NA	NA	NA	NA	NA	NA	NA	NA
		80	2-Heptanone, 4-methyl-	48.99	45	3.99							1	47.5	1.5	10	NA	4.6	NA	NA	NA	NA	NA	NA	NA	NA	NA	NA	NA	NA	NA	NA	NA	NA	NA	NA	NA	NA	NA	NA	NA	NA	NA	NA	NA	NA	NA	NA	NA
		81	Cyclohexanecarboxaldehyde	52.41	47.6	4.81							1	52.5	-0.1	10	NA	7.1	NA	NA	NA	NA	NA	NA	NA	NA	NA	NA	NA	NA	NA	NA	NA	NA	NA	NA	NA	NA	NA	NA	NA	NA	NA	NA	NA	NA	NA	NA	NA
		82	Cyclohexene, 3,5-dimethyl-	49.15	41.2	7.95							1	42.5	6.7	10	NA	NA	NA	NA	NA	NA	NA	NA	NA	NA	NA	NA	NA	NA	NA	NA	NA	NA	NA	NA	NA	NA	NA	NA	NA	NA	NA	NA	NA	NA	NA	NA	NA
		83	Cyclooctene, (Z)-	53.63	46.1	7.53							1	47.5	6.1	10	NA	NA	NA	NA	NA	NA	NA	NA	NA	NA	NA	NA	NA	NA	NA	NA	NA	NA	NA	NA	NA	NA	NA	NA	NA	NA	NA	NA	NA	NA	NA	NA	NA
		84	5-Hexenal, 4-methylene-	59.5	49.9	9.6							1	52.5	7	10	NA	NA	NA	NA	NA	NA	NA	NA	NA	NA	NA	NA	NA	NA	NA	NA	NA	NA	NA	NA	NA	NA	NA	NA	NA	NA	NA	NA	NA	NA	NA	NA	NA
					28.8956	5.1619
																									22	43
																No.	1tR (min)	2tR (min)	Compound	%Area	Match	Rank in MS library match	Literature		1I difference	2I difference
																							1I	2I
																1	10.4	4.92	2-Methyl-2-buten-1-ol	0.01	822	2	760	1320a	-5	39
																2	12.9	4.58	1-Hexanol	0.03	916	1	854	1348	-6	26
																3	14.6	3.54	3-Methyl-2-butenyl acetate	0.69	948	1	902	1225	-1	-7
																4	15.9	5.59	Benzaldehyde	0.02	919	2	933	1520	3	25
																5	16	2.73	α-Pinene	0.09	920	1	933	1033	5	-32
																6	17.6	3.04	β-Myrcene	0.01	898	1	983	1169	-2	-9
																7	17.7	2.88	β-Pinene	0.08	922	1	973	1128	10	-28
																8	17.9	3.46	cis-3-Hexenyl acetate	0.04	934	1	986	1317	2	-25
																9	18.5	4.43	1-Methyl-4-methoxybenzene	5.45	939	1	1003	1461	1	17
																10	18.7	10.2	Benzenemethanol	0.42	921	1	1012	1864	-3	18
																11	19.5	3.06	Limonene	0.33	924	2	1023	1216	6	-12
																12	19.5	3.14	Eucalyptol	0.01	805	1	1022	1227	7	3
																13	19.8	8.41	α-Methylbenzyl alcohol	0.01	795	1	1037	1801	-1	32
																14	19.9	3.12	trans-β-Ocimene	0.01	848	1	1038	1251	0	-20
																15	19.9	10.41	Dipropylene glycol	5.36	907	1	1056	1892b	-18	33
																16	20.6	3.09	1,4-Cyclohexadiene, 1-methyl-4-(1-methylethyl)-	0.02	894	1	1050	1259	6	-27
																17	20.7	3.95	2,6-Dimethyl-7-octen-2-ol	0.5	929	1	1062	1473	-4	-22
																18	21.3	5.51	Methyl benzoate	4.32	956	1	1072	1654	1	18
																19	21.33	4.02	trans-Linalool oxide	0.06	885	1	1074	1461	0	19
																20	21.9	4.29	Linalool	9.84	972	1	1086	1541	2	-5
																21	22.2	4.14	3,5-Dimethylanisole	0.02	874	4	1105	1533b	-10	-14
																22	22.4	3.45	trans-Rose oxide	0.03	903	1	1121	1383	-21	-4
																23	22.5	8.58	Phenylethyl Alcohol	6.56	957	1	1088	1895	15	26
																24	22.8	4.57	Fenchol	0.02	855	1	1105	1580	5	22
																25	23.2	4	1,2-Dihydrolinalool	0.04	864	1	1121	1520	-1	-2
																26	23.6	6.42	β-Phenethyl formate	0.41	908	2	1149	1771a	-19	43
																27	23.8	4.75	β-Terpineol	0.05	895	1	1137	1627a	-3	22
																28	23.9	5.7	Benzyl ethanoate	12.41	975	1	1139	1762	-2	-3
																29	24.4	3.79	cis-p-Menthan-3-one	0.02	911	1	1148	1528	1	-22
																30	24.5	5.02	Ethyl benzoate	0.05	901	1	1150	1698	2	5
																31	25	7.45	2,6-Dimethyl-3,7-octadiene-2,6-diol	0.02	885	1	1185	1945a	-21	-16
																32	25.1	4.53	1-Methyl-4-(1-methylethyl) cyclohexanol	0.92	933	2	1156	1650	10	2
																33	25.2	4.56	Isomenthol	0.02	755	4	1186	1667	-17	-8
																34	25.2	5	α-Methylbenzyl acetate	0.23	938	1	1166	1687a	3	31
																35	25.5	5.91	Methyl salicylate	0.25	952	1	1174	1795	2	21
																36	25.7	4.4	Dihydrocitronellol	0.03	783	1	1182	1680	-1	-33
																37	25.7	4.85	α-Terpineol	0.38	924	2	1175	1705	6	8
																38	26	4.78	γ-Terpineol	0.14	897	1	1178	1684a	11	27
																39	27	4.81	Citronellol	5.48	953	1	1211	1761	3	-20
																40	27.1	5.02	cis-Geraniol	0.36	928	1	1213	1815	3	-43
																41	27.3	5.22	Isogeraniol	0.1	826	1	1237	1812	-16	-10
																42	27.6	5.5	β-Phenethyl acetate	0.09	928	2	1228	1822	1	19
																43	28.1	5.28	trans-Geraniol	4.93	953	1	1237	1854	4	-24
																44	28.1	3.58	Linalyl acetate	2.08	955	1	1241	1563	0	-20
																45	28.3	4.63	α-Citral	0.03	899	1	1249	1732a	-3	18
																46	28.8	6.02	Hydroxycitronellal	1.03	935	1	1266	1929a	-7	1
																47	29.2	4.93	Anethole	0.2	936	2	1264	1817a	5	2
																48	29.4	4.76	Benzyl 2-methylpropanoate	0.01	881	1	1273	1784a	1	17
																49	31	8.95	Methyl anthranilate	0.22	962	1	1326	2194	-11	17
																50	31.4	6.44	Dihydro-5-pentyl-2(3H)-furanone	0.22	942	1	1324	2024b	2	23
																51	31.5	3.71	Citronellol acetate	0.7	894	1	1335	1668	-6	-8
																52	31.8	7.47	Eugenol	0.84	947	1	1335	2168	2	-25
																53	32.7	3.92	Geranyl acetate	1.7	956	1	1361	1764	-1	-23
																54	33	4.15	1-(2,6,6-Trimethyl-1-cyclohexen-1-yl)-2-buten-1-one	0.03	680	3	1395	1830a	-27	-32
																55	33.2	5.29	3-Methyl-2-(cis-2-penten-1-yl)-2-cyclopenten-1-one	0.02	833	1	1368	1964	5	18
																56	34.7	6.3	3-Phenyl-2-propenyl acetate	2.9	951	1	1418	2176	-4	-35
																57	34.8	4	Nopyl acetate	0.05	809	1	1413	1777a	3	40
																58	35.4	6.19	5-Hexyldihydro-2(3H)-furanone	0.04	847	1	1428	2119	5	35
																59	36	3.57	β-Chamigrene	0.04	725	26	1475	1737	-26	1
																60	36.3	4.66	Pentyl benzoate	0.07	828	1	1456	1987	2	-1
																61	36.8	3.53	α-Selinene	0.02	677	33	1491	1751	-19	-3
																62	36.9	4.47	β-Ionone	0.77	922	1	1491	1971a	-17	0
																63	37	4.07	α-Cetone	1.33	933	1	1484	1877	-7	19
																64	38.2	4.14	1-(2,6,6-Trimethylcyclohex-2-en-1-yl)-1-pentene-3-one	0.45	902	3	1503	1933	8	11
																65	38.7	4.7	Isoamyl salicylate	0.12	884	1	1515	2033a	10	35
																66	38.9	4.17	β-Methyl ionone	1.86	736	2	1557	1988b	-26	-15
																67	39.3	5.23	α-(Trichloromethyl)benzyl acetate	0.35	856	1	1538	2197a	4	-28
																68	39.6	4.24	3,7,11-Trimethyl-1,6,10-dodecatrien-3-ol	0.03	730	1	1551	2020	0	-9
																69	39.9	6.46	Diethyl Phthalate	9.14	946	1	1564	2378b	-5	-41
																70	42.2	5.19	Methyl (2-pentyl-3-oxocyclopentyl) acetate	0.61	896	1	1649	2264a	-23	-2
																71	43.3	5.02	cis-3-Hexenyl salicylate	0.28	898	1	1644	2280a	15	-4
																72	23.8	8.5	3,7-Dimethyl-1-octen-3-ol	0.01	761	1	1122	Not available	12	-
																73	32.7	3.82	4-tert-Butylcyclohexyl acetate	0.83	932	1	1346	Not available	14	-
																74	35.2	5.17	3,4-Dihydro-β-ionone	0.25	729	7	1460	Not available	-33	-
																75	35.7	4.86	3-(4-Isopropylphenyl)-2-methylpropionaldehyde	0.25	921	1	1424	Not available	17	-
																76	38.1	4.79	Lilial	6.94	909	1	1500	Not available	8	-
																77	39	7.5	α-Methyl-3,4-methylenedioxy-hydrocinnamic aldehyde	0.61	940	1	1542	Not available	-8	-
																78	39	9.06	Methyl 2-formamidobenzoate	0.03	878	1	1564	Not available	-30	-
																79	39.1	4.13	6-Methyl-β-ionone	0.43	763	2	1566	Not available	-30	-
																80	45	3.99	Caryophyllene acetate	0.08	792	1	1720	Not available	-10	-
																81	47.6	4.81	9-Acetyl-2,6,6,8-tetramethyltricyclo (5.3.1.01,5) undec-8-ene	2.38	952	1	1780	Not available	9	-
																82	41.2	7.95	1-Acetonaphthone	0.39	926	3	1592	2471b	5	-
																83	46.1	7.53	Benzyl Benzoate	0.97	935	1	1732	2272	12	-
																84	49.9	9.6	Benzyl salicylate	1.87	956	1	1836	2784a	22	-
[truncated: 28 more columns]

## Sheet: Time recal
# injections	25	10	5	4	2	1
Analysis time (h)	25	10	5	4	2	1
H/C window (min)	0.2	0.5	1	1.25	2.5	5
2wb,ave (min)	0.0694	0.0843	0.0876	0.0904	0.0935	0.0947
# separated peaks	84	84	84	83	81	74
Total peak capacity	9198	6060	2958	2296	1134	583
0.2	min H/C window	2wb,ave (min)	0.0694		0.5	min H/C window	Baseline width (min)	0.0843		1	min H/C window	Baseline width (min)	0.0876		1.25	min H/C window	Baseline width (min)	0.0904		2.5	min H/C window	Baseline width (min)	0.0935		5	min H/C window	Baseline width (min)	0.0947
		# identified peaks	84				# identified peaks	84				# identified peaks	84				# identified peaks	83				# identified peaks	81				# identified peaks	74
1tR,recal	2tR,recal	2tR,recal,grid-scale	Grid-scale coordinate		1tR,recal	2tR,recal	2tR,recal,grid-scale	Grid-scale coordinate		1tR,recal	2tR,recal	2tR,recal,grid-scale	Grid-scale coordinate		1tR,recal	2tR,recal	2tR,recal,grid-scale	Grid-scale coordinate		1tR,recal	2tR,recal	2tR,recal,grid-scale	Grid-scale coordinate		1tR,recal	2tR,recal	2tR,recal,grid-scale	Grid-scale coordinate
10.4	4.92	4.9	10.4,4.9		10.75	4.6	4.6	10.75,4.6		10.5	4.8	4.8	10.5,4.8		10.625	4.7	4.7	10.63,4.7		11.25	4.1	4.1	11.25,4.1		12.5	2.8	2.8	12.5,2.8
12.9	4.58	4.6	12.9,4.6		13.25	4.2	4.2	13.25,4.2		13.5	4	4	13.5,4		13.125	4.4	4.4	13.13,4.4		13.75	3.7	3.7	13.75,3.7		17.5	0	0	17.5,0
14.6	3.54	3.6	14.6,3.6		14.75	3.4	3.5	14.75,3.5		15.5	2.6	2.6	15.5,2.6		15.625	2.5	2.5	15.63,2.5		16.25	1.9	2	16.25,2		17.5	0.6	0.7	17.5,0.7
15.9	5.59	5.6	15.9,5.6		16.25	5.2	5.2	16.25,5.2		16.5	5	5.1	16.5,5.1		16.875	4.6	4.6	16.88,4.6		16.25	5.2	5.2	16.25,5.2		17.5	4	4.1	17.5,4.1
16	2.73	2.8	16,2.8		16.25	2.5	2.5	16.25,2.5		16.5	2.2	2.3	16.5,2.3		16.875	1.9	2	16.88,2		16.25	2.5	2.5	16.25,2.5		17.5	1.2	1.2	17.5,1.2
17.6	3.06	3.1	17.6,3.1		17.75	2.9	3	17.75,3		18.5	2.2	2.3	18.5,2.3		18.125	2.5	2.5	18.13,2.5		18.75	1.9	2	18.75,2		22.5	0	0	22.5,0
17.7	2.88	2.9	17.7,2.9		17.75	2.8	2.9	17.75,2.9		18.5	2.1	2.1	18.5,2.1		18.125	2.5	2.5	18.13,2.5		18.75	1.8	1.9	18.75,1.9		22.5	0	0	22.5,0
17.9	3.46	3.5	17.9,3.5		18.25	3.1	3.1	18.25,3.1		18.5	2.9	3	18.5,3		18.125	3.2	3.3	18.13,3.3		18.75	2.6	2.6	18.75,2.6		22.5	0	0	22.5,0
18.5	4.43	4.4	18.5,4.4		18.75	4.2	4.2	18.75,4.2		18.5	4.4	4.5	18.5,4.5		19.375	3.6	3.6	19.38,3.6		18.75	4.2	4.2	18.75,4.2		22.5	0.4	0.5	22.5,0.5
18.7	10.2	10.2	18.7,10.2		18.75	10.2	10.2	18.75,10.2		19.5	9.4	9.5	19.5,9.5		19.375	9.5	9.6	19.38,9.6		18.75	10.2	10.3	18.75,10.3		22.5	6.4	6.4	22.5,6.4
19.5	3.04	3.1	19.5,3.1		19.75	2.8	2.9	19.75,2.9		19.5	3	3.1	19.5,3.1		20.625	1.9	2	20.63,2		21.25	1.3	1.3	21.25,1.3		22.5	0	0	22.5,0
19.5	3.14	3.2	19.5,3.2		19.75	2.9	3	19.75,3		19.5	3.1	3.2	19.5,3.2		20.625	2	2.1	20.63,2.1		21.25	1.4	1.4	21.25,1.4		22.5	0.1	0.2	22.5,0.2
19.8	8.41	8.5	19.8,8.5		20.25	8	8	20.25,8		20.5	7.7	7.7	20.5,7.7		20.625	7.6	7.7	20.63,7.7		21.25	7	7	21.25,7		22.5	5.7	5.8	22.5,5.8
19.9	3.12	3.1	19.9,3.1		20.25	2.8	2.9	20.25,2.9		20.5	2.5	2.5	20.5,2.5		20.625	2.4	2.4	20.63,2.4		21.25	1.8	1.9	21.25,1.9		22.5	0.5	0.6	22.5,0.6
19.9	10.41	10.4	19.9,10.4		20.25	10.1	10.1	20.25,10.1		20.5	9.8	9.8	20.5,9.8		20.625	9.7	9.8	20.63,9.8		21.25	9.1	9.2	21.25,9.2		22.5	7.8	7.9	22.5,7.9
20.6	3.09	3.1	20.6,3.1		20.75	2.9	3	20.75,3		21.5	2.2	2.3	21.5,2.3		20.625	3.1	3.2	20.63,3.2		21.25	2.4	2.4	21.25,2.4		22.5	1.2	1.2	22.5,1.2
20.7	3.95	4	20.7,4		20.75	3.9	4	20.75,4		21.5	3.2	3.2	21.5,3.2		21.875	2.8	2.8	21.88,2.8		21.25	3.4	3.5	21.25,3.5		22.5	2.2	2.3	22.5,2.3
21.3	5.51	5.6	21.3,5.6		21.75	5.1	5.1	21.75,5.1		21.5	5.3	5.3	21.5,5.3		21.875	4.9	5	21.88,5		23.75	3.1	3.2	23.75,3.2		22.5	4.3	4.4	22.5,4.4
21.33	4.02	4	21.33,4		21.75	3.6	3.6	21.75,3.6		21.5	3.9	3.9	21.5,3.9		21.875	3.5	3.5	21.88,3.5		23.75	1.6	1.7	23.75,1.7		22.5	2.9	2.9	22.5,2.9
21.9	4.29	4.3	21.9,4.3		22.25	3.9	4	22.25,4		22.5	3.7	3.8	22.5,3.8		23.125	3.1	3.2	23.13,3.2		23.75	2.4	2.4	23.75,2.4		22.5	3.7	3.8	22.5,3.8
22.2	4.14	4.2	22.2,4.2		22.25	4.1	4.1	22.25,4.1		22.5	3.8	3.9	22.5,3.9		23.125	3.2	3.3	23.13,3.3		23.75	2.6	2.6	23.75,2.6		22.5	3.8	3.9	22.5,3.9
22.4	3.45	3.5	22.4,3.5		22.75	3.1	3.1	22.75,3.1		22.5	3.4	3.4	22.5,3.4		23.125	2.7	2.7	23.13,2.7		23.75	2.1	2.2	23.75,2.2		22.5	3.4	3.4	22.5,3.4
22.5	8.58	8.6	22.5,8.6		22.75	8.3	8.3	22.75,8.3		22.5	8.6	8.7	22.5,8.7		23.125	8	8	23.13,8		23.75	7.3	7.4	23.75,7.4		22.5	8.6	8.6	22.5,8.6
22.8	4.57	4.6	22.8,4.6		23.25	4.1	4.1	23.25,4.1		23.5	3.9	3.9	23.5,3.9		23.125	4.2	4.2	23.13,4.2		23.75	3.6	3.6	23.75,3.6		27.5	0	0	27.5,0
23.2	4	4	23.2,4		23.25	4	4	23.25,4		23.5	3.7	3.8	23.5,3.8		24.375	2.8	2.8	24.38,2.8		23.75	3.5	3.6	23.75,3.6		27.5	0	0	27.5,0
23.6	6.42	6.5	23.6,6.5		23.75	6.3	6.3	23.75,6.3		24.5	5.5	5.5	24.5,5.5		24.375	5.6	5.6	24.38,5.6		23.75	6.3	6.4	23.75,6.4		27.5	2.5	2.6	27.5,2.6
23.8	4.75	4.8	23.8,4.8		24.25	4.3	4.4	24.25,4.4		24.5	4.1	4.1	24.5,4.1		24.375	4.2	4.2	24.38,4.2		26.25	2.3	2.3	26.25,2.3		27.5	1.1	1.1	27.5,1.1
23.9	5.7	5.8	23.9,5.8		24.25	5.4	5.5	24.25,5.5		24.5	5.1	5.2	24.5,5.2		24.375	5.2	5.2	24.38,5.2		26.25	3.4	3.5	26.25,3.5		27.5	2.1	2.2	27.5,2.2
24.4	3.79	3.8	24.4,3.8		24.75	3.4	3.5	24.75,3.5		24.5	3.7	3.8	24.5,3.8		25.625	2.6	2.6	25.63,2.6		26.25	1.9	2	26.25,2		27.5	0.7	0.8	27.5,0.8
24.5	5.02	5.1	24.5,5.1		24.75	4.8	4.8	24.75,4.8		24.5	5	5.1	24.5,5.1		25.625	3.9	4	25.63,4		26.25	3.3	3.4	26.25,3.4		27.5	2	2.1	27.5,2.1
25	7.45	7.5	25,7.5		25.25	7.2	7.2	25.25,7.2		25.5	7	7	25.5,7		25.625	6.8	6.9	25.63,6.9		26.25	6.2	6.3	26.25,6.3		27.5	5	5	27.5,5
25.1	4.53	4.6	25.1,4.6		25.25	4.4	4.5	25.25,4.5		25.5	4.1	4.1	25.5,4.1		25.625	4	4.1	25.63,4.1		26.25	3.4	3.5	26.25,3.5		27.5	2.1	2.2	27.5,2.2
25.2	4.56	4.6	25.2,4.6		25.25	4.5	4.6	25.25,4.6		25.5	4.3	4.4	25.5,4.4		25.625	4.1	4.2	25.63,4.2		26.25	3.5	3.6	26.25,3.6		27.5	2.3	2.4	27.5,2.4
25.2	5	5.1	25.2,5.1		25.25	5	5.1	25.25,5.1		25.5	4.7	4.7	25.5,4.7		25.625	4.6	4.6	25.63,4.6		26.25	4	4	26.25,4		27.5	2.7	2.7	27.5,2.7
25.5	5.91	6	25.5,6		25.75	5.7	5.7	25.75,5.7		25.5	5.9	6	25.5,6		25.625	5.8	5.9	25.63,5.9		26.25	5.2	5.2	26.25,5.2		27.5	3.9	4	27.5,4
25.7	4.4	4.4	25.7,4.4		25.75	4.4	4.5	25.75,4.5		26.5	3.6	3.7	26.5,3.7		26.875	3.2	3.3	26.88,3.3		26.25	3.9	3.9	26.25,3.9		27.5	2.6	2.7	27.5,2.7
25.7	4.85	4.9	25.7,4.9		25.75	4.8	4.8	25.75,4.8		26.5	4.1	4.1	26.5,4.1		26.875	3.7	3.7	26.88,3.7		26.25	4.3	4.3	26.25,4.3		27.5	3.1	3.1	27.5,3.1
26	4.78	4.8	26,4.8		26.25	4.5	4.6	26.25,4.6		26.5	4.3	4.4	26.5,4.4		26.875	3.9	4	26.88,4		26.25	4.5	4.6	26.25,4.6		27.5	3.3	3.3	27.5,3.3
27	4.81	4.9	27,4.9		27.25	4.6	4.6	27.25,4.6		27.5	4.3	4.4	27.5,4.4		28.125	3.7	3.7	28.13,3.7		28.75	3.1	3.2	28.75,3.2		27.5	4.3	4.4	27.5,4.4
27.1	5.02	5.1	27.1,5.1		27.25	4.9	5	27.25,5		27.5	4.6	4.6	27.5,4.6		28.125	4	4.1	28.13,4.1		28.75	3.4	3.5	28.75,3.5		27.5	4.6	4.6	27.5,4.6
27.3	5.22	5.3	27.3,5.3		27.75	4.8	4.8	27.75,4.8		27.5	5	5.1	27.5,5.1		28.125	4.4	4.4	28.13,4.4		28.75	3.8	3.8	28.75,3.8		27.5	5	5	27.5,5
27.6	5.5	5.6	27.6,5.6		27.75	5.4	5.5	27.75,5.5		28.5	4.6	4.6	28.5,4.6		28.125	5	5.1	28.13,5.1		28.75	4.4	4.5	28.75,4.5		32.5	0.6	0.7	32.5,0.7
28.1	5.28	5.3	28.1,5.3		28.25	5.1	5.1	28.25,5.1		28.5	4.9	4.9	28.5,4.9		28.125	5.3	5.3	28.13,5.3		28.75	4.6	4.7	28.75,4.7		32.5	0.9	0.9	32.5,0.9
28.1	3.58	3.6	28.1,3.6		28.25	3.4	3.5	28.25,3.5		28.5	3.2	3.2	28.5,3.2		28.125	3.6	3.6	28.13,3.6		28.75	2.9	3	28.75,3		32.5	0	0	32.5,0
28.3	4.63	4.6	28.3,4.6		28.75	4.2	4.2	28.75,4.2		28.5	4.4	4.5	28.5,4.5		29.375	3.6	3.6	29.38,3.6		28.75	4.2	4.2	28.75,4.2		32.5	0.4	0.5	32.5,0.5
28.8	6.02	6	28.8,6		29.25	5.6	5.6	29.25,5.6		29.5	5.3	5.3	29.5,5.3		29.375	5.4	5.4	29.38,5.4		31.25	3.6	3.6	31.25,3.6		32.5	2.3	2.4	32.5,2.4
29.2	4.93	5	29.2,5		29.25	4.9	5	29.25,5		29.5	4.6	4.6	29.5,4.6		29.375	4.8	4.9	29.38,4.9		31.25	2.9	3	31.25,3		32.5	1.6	1.6	32.5,1.6
29.4	4.76	4.8	29.4,4.8		29.75	4.4	4.5	29.75,4.5		29.5	4.7	4.7	29.5,4.7		30.625	3.5	3.5	30.63,3.5		31.25	2.9	3	31.25,3		32.5	1.7	1.7	32.5,1.7
31	8.95	9	31,9		31.25	8.7	8.8	31.25,8.8		31.5	8.5	8.6	31.5,8.6		31.875	8.1	8.1	31.88,8.1		31.25	8.7	8.8	31.25,8.8		32.5	7.5	7.6	32.5,7.6
31.4	6.44	6.5	31.4,6.5		31.75	6.1	6.2	31.75,6.2		31.5	6.3	6.3	31.5,6.3		31.875	6	6.1	31.88,6.1		33.75	4.1	4.1	33.75,4.1		32.5	5.3	5.3	32.5,5.3
31.5	3.71	3.7	31.5,3.7		31.75	3.5	3.5	31.75,3.5		31.5	3.7	3.8	31.5,3.8		31.875	3.3	3.3	31.88,3.3		33.75	1.5	1.6	33.75,1.6		32.5	2.7	2.7	32.5,2.7
31.8	7.47	7.5	31.8,7.5		32.25	7	7.1	32.25,7.1		32.5	6.8	6.8	32.5,6.8		31.875	7.4	7.4	31.88,7.4		33.75	5.5	5.5	33.75,5.5		32.5	6.8	6.8	32.5,6.8
32.7	3.92	4	32.7,4		32.75	3.9	4	32.75,4		33.5	3.1	3.2	33.5,3.2		33.125	3.5	3.5	33.13,3.5		33.75	2.9	3	33.75,3		37.5	0	0	37.5,0
33	4.15	4.2	33,4.2		33.25	3.9	4	33.25,4		33.5	3.7	3.8	33.5,3.8		33.125	4	4.1	33.13,4.1		33.75	3.4	3.5	33.75,3.5		37.5	0	0	37.5,0
33.2	5.29	5.3	33.2,5.3		33.25	5.2	5.2	33.25,5.2		33.5	5	5.1	33.5,5.1		34.375	4.1	4.2	34.38,4.2		33.75	4.7	4.8	33.75,4.8		37.5	1	1	37.5,1
34.7	6.3	6.3	34.7,6.3		34.75	6.3	6.3	34.75,6.3		35.5	5.5	5.5	35.5,5.5		35.625	5.4	5.4	35.63,5.4		36.25	4.8	4.9	36.25,4.9		37.5	3.5	3.5	37.5,3.5
34.8	4	4	34.8,4		35.25	3.6	3.6	35.25,3.6		35.5	3.3	3.3	35.5,3.3		35.625	3.2	3.3	35.63,3.3		36.25	2.6	2.6	36.25,2.6		37.5	1.3	1.3	37.5,1.3
35.4	6.19	6.2	35.4,6.2		35.75	5.8	5.8	35.75,5.8		35.5	6.1	6.1	35.5,6.1		35.625	6	6.1	35.63,6.1		36.25	5.3	5.3	36.25,5.3		37.5	4.1	4.2	37.5,4.2
36	3.57	3.6	36,3.6		36.25	3.3	3.4	36.25,3.4		36.5	3.1	3.2	36.5,3.2		36.875	2.7	2.7	36.88,2.7		36.25	3.3	3.4	36.25,3.4		37.5	2.1	2.2	37.5,2.2
36.3	4.66	4.7	36.3,4.7		36.75	4.2	4.2	36.75,4.2		36.5	4.5	4.6	36.5,4.6		36.875	4.1	4.2	36.88,4.2		38.75	2.2	2.2	38.75,2.2		37.5	3.5	3.5	37.5,3.5
36.8	3.53	3.5	36.8,3.5		37.25	3.1	3.1	37.25,3.1		37.5	2.8	2.8	37.5,2.8		36.875	3.5	3.5	36.88,3.5		38.75	1.6	1.7	38.75,1.7		37.5	2.8	2.8	37.5,2.8
36.9	4.47	4.5	36.9,4.5		37.25	4.1	4.1	37.25,4.1		37.5	3.9	3.9	37.5,3.9		38.125	3.2	3.3	38.13,3.3		38.75	2.6	2.6	38.75,2.6		37.5	3.9	4	37.5,4
37	4.07	4.1	37,4.1		37.25	3.8	3.9	37.25,3.9		37.5	3.6	3.7	37.5,3.7		38.125	2.9	3	38.13,3		38.75	2.3	2.3	38.75,2.3		37.5	3.6	3.7	37.5,3.7
38.2	4.14	4.2	38.2,4.2		38.25	4.1	4.1	38.25,4.1		38.5	3.8	3.9	38.5,3.9		39.375	3	3.1	39.38,3.1		38.75	3.6	3.6	38.75,3.6		42.5	0	0	42.5,0
38.7	4.7	4.7	38.7,4.7		38.75	4.7	4.7	38.75,4.7		39.5	3.9	3.9	39.5,3.9		39.375	4	4.1	39.38,4.1		38.75	4.7	4.8	38.75,4.8		42.5	0.9	0.9	42.5,0.9
38.9	4.17	4.2	38.9,4.2		39.25	3.8	3.9	39.25,3.9		39.5	3.6	3.7	39.5,3.7		39.375	3.7	3.7	39.38,3.7		41.25	1.8	1.9	41.25,1.9		42.5	0.6	0.7	42.5,0.7
39.3	5.23	5.3	39.3,5.3		39.75	4.8	4.8	39.75,4.8		39.5	5	5.1	39.5,5.1		39.375	5.2	5.2	39.38,5.2		41.25	3.3	3.4	41.25,3.4		42.5	2	2.1	42.5,2.1
39.6	4.24	4.3	39.6,4.3		39.75	4.1	4.1	39.75,4.1		40.5	3.3	3.3	40.5,3.3		40.625	3.2	3.3	40.63,3.3		41.25	2.6	2.6	41.25,2.6		42.5	1.3	1.3	42.5,1.3
39.9	6.46	6.5	39.9,6.5		40.25	6.1	6.2	40.25,6.2		40.5	5.9	6	40.5,6		40.625	5.7	5.8	40.63,5.8		41.25	5.1	5.1	41.25,5.1		42.5	3.9	4	42.5,4
42.2	5.19	5.2	42.2,5.2		42.25	5.1	5.1	42.25,5.1		42.5	4.9	4.9	42.5,4.9		43.125	4.3	4.3	43.13,4.3		43.75	3.6	3.6	43.75,3.6		42.5	4.9	4.9	42.5,4.9
43.3	5.02	5.1	43.3,5.1		43.75	4.6	4.6	43.75,4.6		43.5	4.8	4.8	43.5,4.8		44.375	3.9	4	44.38,4		43.75	4.6	4.7	43.75,4.7		47.5	0.8	0.9	47.5,0.9
23.8	8.5	8.5	23.8,8.5		24.25	8.1	8.2	24.25,8.2		24.5	7.8	7.9	24.5,7.9		24.375	7.9	8	24.38,8		26.25	6.1	6.2	26.25,6.2		27.5	4.8	4.8	27.5,4.8
32.7	3.82	3.9	32.7,3.9		32.75	3.8	3.9	32.75,3.9		33.5	3	3.1	33.5,3.1		33.125	3.4	3.4	33.13,3.4		33.75	2.8	2.8	33.75,2.8		37.5	0	0	37.5,0
35.2	5.17	5.2	35.2,5.2		35.25	5.1	5.1	35.25,5.1		35.5	4.9	4.9	35.5,4.9		35.625	4.7	4.7	35.63,4.7		36.25	4.1	4.1	36.25,4.1		37.5	2.9	2.9	37.5,2.9
35.7	4.86	4.9	35.7,4.9		35.75	4.8	4.8	35.75,4.8		36.5	4.1	4.1	36.5,4.1		36.875	3.7	3.7	36.88,3.7		36.25	4.3	4.3	36.25,4.3		37.5	3.1	3.1	37.5,3.1
38.1	4.79	4.9	38.1,4.9		38.25	4.6	4.6	38.25,4.6		38.5	4.4	4.5	38.5,4.5		38.125	4.8	4.9	38.13,4.9		38.75	4.1	4.1	38.75,4.1		42.5	0.4	0.5	42.5,0.5
39	7.5	7.6	39,7.6		39.25	7.3	7.3	39.25,7.3		39.5	7	7	39.5,7		39.375	7.1	7.1	39.38,7.1		41.25	5.3	5.3	41.25,5.3		42.5	4	4.1	42.5,4.1
39	9.06	9.1	39,9.1		39.25	8.8	8.9	39.25,8.9		39.5	8.6	8.7	39.5,8.7		39.375	8.7	8.8	39.38,8.8		41.25	6.8	6.8	41.25,6.8		42.5	5.6	5.7	42.5,5.7
39.1	4.13	4.2	39.1,4.2		39.25	4	4	39.25,4		39.5	3.7	3.8	39.5,3.8		39.375	3.9	4	39.38,4		41.25	2	2.1	41.25,2.1		42.5	0.7	0.8	42.5,0.8
45	3.99	4	45,4		45.25	3.7	3.7	45.25,3.7		45.5	3.5	3.5	45.5,3.5		45.625	3.4	3.4	45.63,3.4		46.25	2.7	2.7	46.25,2.7		47.5	1.5	1.5	47.5,1.5
47.6	4.81	4.9	47.6,4.9		47.75	4.7	4.7	47.75,4.7		48.5	3.9	3.9	48.5,3.9		48.125	4.3	4.3	48.13,4.3		48.75	3.7	3.7	48.75,3.7		52.5	0	0	52.5,0
41.2	7.95	8	41.2,8		41.25	7.9	7.9	41.25,7.9		41.5	7.7	7.7	41.5,7.7		41.875	7.3	7.3	41.88,7.3		41.25	7.9	7.9	41.25,7.9		42.5	6.7	6.7	42.5,6.7
46.1	7.53	7.6	46.1,7.6		46.25	7.4	7.4	46.25,7.4		46.5	7.1	7.2	46.5,7.2		46.875	6.8	6.9	46.88,6.9		46.25	7.4	7.5	46.25,7.5		47.5	6.1	6.2	47.5,6.2
49.9	9.6	9.6	49.9,9.6		50.25	9.3	9.4	50.25,9.4		50.5	9	9	50.5,9		50.625	8.9	8.9	50.63,8.9		51.25	8.3	8.3	51.25,8.3		52.5	7	7	52.5,7

## Sheet: 1D2DRI and 2D time (MEROXOX2)
						constant	2.0631	HC	2.64272	2.9359	GCXGC																																		Input		0	0	0
						p5	-4.75235		-7.2356	-6.41494																																			coefficient		0	0	0
		T ramp rate	Hold time	Start temperature		p4	-10.9572		5.55588	7.8266																																	-1.89026		for the	p5	-9.00565	-11.9307	-6.77159
		4	10	35		p3	-0.672968		-26.4775	-0.672968																																	-15.7288		curve fitting	p4	-15.7306	-15.7287	-15.7287
						p2	0.0261625		-0.109455	0.258717																																	-0.130948		between	p3	-0.0248364	-0.13911	-0.13911
						p1	-0.00725849		-0.00408937	-0.00792355						44.74																											6.60257		1tR vs 2tR	p2	0.311854	0.437477	-0.132476
		Isothermal and without correction of Peak no. calculation	Starting modulation time (min)	Starting modulation period (s)						0																																	-0.0701646		of alkanes	p1	-0.000764985	-0.000558299	-0.000782994
	Sum		0	9					Alkane time (min)
	7359.03			Experimental			Calculated		8	9	10	11	12	13	14	15	16	17	18	19	20	21	22	23	24	25	26	8	9	10	11	12	13	14	15	16	17	18	19	20	21	22	23	24	25		Alkane time in 2D (s)
H/C window (min)	2DRI difference	Peak	Analyte 1D modulated time (min)	1DRI	2DRI	2D time (s)	1DRI	2DRI	26.49	31.99	36.79	40.69	43.79	46.39	48.69	50.49	52.09	53.79	55.59	57.59	59.99	62.99	0	0	0	0	0																				8	9	10
0.2	7.27273	29.3888	29.1888	32		2.81124	849.068	975.312	849.068	0	0	0	0	0	0	0	0	0	0	0	0	0	0	0	0	0		0	975.312	0	0	0	0	0	0	0	0	0	0	0	0	0	0	0	0	10	2.39483	2.58654	2.88906
	158.184		29.5888			2.41124	856.341	817.128	856.341	0	0	0	0	0	0	0	0	0	0	0	0	0	0	0	0	0		817.128	0	0	0	0	0	0	0	0	0	0	0	0	0	0	0	0	0	12	2.38114	2.56231	2.84669
0.5	18.1818		28.8888			3.11124	843.614	1039.43	843.614	0	0	0	0	0	0	0	0	0	0	0	0	0	0	0	0	0		0	0	1039.43	0	0	0	0	0	0	0	0	0	0	0	0	0	0	0	14	2.40559	2.60568	2.92268
	1039.43		29.8888			2.11124	861.796	0	861.796	0	0	0	0	0	0	0	0	0	0	0	0	0	0	0	0	0		0	0	0	0	0	0	0	0	0	0	0	0	0	0	0	0	0	0	16	2.37135	2.54505	2.81664
1	36.3636		28.3888			3.61124	834.523	1110.37	834.523	0	0	0	0	0	0	0	0	0	0	0	0	0	0	0	0	0		0	0	0	1110.37	0	0	0	0	0	0	0	0	0	0	0	0	0	0	18	2.42453	2.63955	2.98251
	1110.37		30.3888			1.61124	870.887	0	870.887	0	0	0	0	0	0	0	0	0	0	0	0	0	0	0	0	0		0	0	0	0	0	0	0	0	0	0	0	0	0	0	0	0	0	0	20	2.35586	2.5179	2.76963
1.25	45.4545		28.1388			3.86124	829.978	1132.64	829.978	0	0	0	0	0	0	0	0	0	0	0	0	0	0	0	0	0		0	0	0	1132.64	0	0	0	0	0	0	0	0	0	0	0	0	0	0	22	2.43449	2.65747	3.01431
	1132.64		30.6388			1.36124	875.432	0	875.432	0	0	0	0	0	0	0	0	0	0	0	0	0	0	0	0	0		0	0	0	0	0	0	0	0	0	0	0	0	0	0	0	0	0	0	24	2.3485	2.50505	2.74748
2.5	90.9091		26.8888			5.11124	807.25	1202.92	807.25	0	0	0	0	0	0	0	0	0	0	0	0	0	0	0	0	0		0	0	0	0	1202.92	0	0	0	0	0	0	0	0	0	0	0	0	0	26	2.48989	2.7581	3.19486
	1202.92		31.8888			0.111236	898.159	0	898.159	0	0	0	0	0	0	0	0	0	0	0	0	0	0	0	0	0		0	0	0	0	0	0	0	0	0	0	0	0	0	0	0	0	0	0	28	2.31504	2.4472	2.6487
5	949.974		24.3888			7.61124	0	1231.68	0	0	0	0	0	0	0	0	0	0	0	0	0	0	0	0	0	0		0	0	0	0	1231.68	0	0	0	0	0	0	0	0	0	0	0	0	0	30	2.63558	3.0302	3.69684
	1231.68		34.3888			-2.38876	949.974	0	0	949.974	0	0	0	0	0	0	0	0	0	0	0	0	0	0	0	0		0	0	0	0	0	0	0	0	0	0	0	0	0	0	0	0	0	0	32	2.26203	2.35757	2.49898
							0	0	0	0	0	0	0	0	0	0	0	0	0	0	0	0	0	0	0	0		0	0	0	0	0	0	0	0	0	0	0	0	0	0	0	0	0	0	34	45.1718	127.045	364.416
0.2	7.27273	29.3888	29.1888	32.5		3.31124	849.068	1089.19	849.068	0	0	0	0	0	0	0	0	0	0	0	0	0	0	0	0	0		0	0	1089.19	0	0	0	0	0	0	0	0	0	0	0	0	0	0	0	36	2.39483	2.58654	2.88906
	73.7995		29.5888			2.91124	856.341	1015.39	856.341	0	0	0	0	0	0	0	0	0	0	0	0	0	0	0	0	0		0	0	1015.39	0	0	0	0	0	0	0	0	0	0	0	0	0	0	0	38	2.38114	2.56231	2.84669
0.5	18.1818		28.8888			3.61124	843.614	1125.36	843.614	0	0	0	0	0	0	0	0	0	0	0	0	0	0	0	0	0		0	0	0	1125.36	0	0	0	0	0	0	0	0	0	0	0	0	0	0	40	2.40559	2.60568	2.92268
	200.043		29.8888			2.61124	861.796	925.32	861.796	0	0	0	0	0	0	0	0	0	0	0	0	0	0	0	0	0		0	925.32	0	0	0	0	0	0	0	0	0	0	0	0	0	0	0	0	42	2.37135	2.54505	2.81664
1	36.3636		28.3888			4.11124	834.523	1169.07	834.523	0	0	0	0	0	0	0	0	0	0	0	0	0	0	0	0	0		0	0	0	1169.07	0	0	0	0	0	0	0	0	0	0	0	0	0	0	44	2.42453	2.63955	2.98251
	1169.07		30.3888			2.11124	870.887	0	870.887	0	0	0	0	0	0	0	0	0	0	0	0	0	0	0	0	0		0	0	0	0	0	0	0	0	0	0	0	0	0	0	0	0	0	0	46	2.35586	2.5179	2.76963
1.25	45.4545		28.1388			4.36124	829.978	1186.27	829.978	0	0	0	0	0	0	0	0	0	0	0	0	0	0	0	0	0		0	0	0	1186.27	0	0	0	0	0	0	0	0	0	0	0	0	0	0	48	2.43449	2.65747	3.01431
	1186.27		30.6388			1.86124	875.432	0	875.432	0	0	0	0	0	0	0	0	0	0	0	0	0	0	0	0	0		0	0	0	0	0	0	0	0	0	0	0	0	0	0	0	0	0	0	50	2.3485	2.50505	2.74748
2.5	90.9091		26.8888			5.61124	807.25	1232.4	807.25	0	0	0	0	0	0	0	0	0	0	0	0	0	0	0	0	0		0	0	0	0	1232.4	0	0	0	0	0	0	0	0	0	0	0	0	0	52	2.48989	2.7581	3.19486
	1232.4		31.8888			0.611236	898.159	0	898.159	0	0	0	0	0	0	0	0	0	0	0	0	0	0	0	0	0		0	0	0	0	0	0	0	0	0	0	0	0	0	0	0	0	0	0	54	2.31504	2.4472	2.6487
5	949.974		24.3888			8.11124	0	1247.97	0	0	0	0	0	0	0	0	0	0	0	0	0	0	0	0	0	0		0	0	0	0	1247.97	0	0	0	0	0	0	0	0	0	0	0	0	0	56	2.63558	3.0302	3.69684
	1247.97		34.3888			-1.88876	949.974	0	0	949.974	0	0	0	0	0	0	0	0	0	0	0	0	0	0	0	0		0	0	0	0	0	0	0	0	0	0	0	0	0	0	0	0	0	0	58	2.26203	2.35757	2.49898
							0	0	0	0	0	0	0	0	0	0	0	0	0	0	0	0	0	0	0	0		0	0	0	0	0	0	0	0	0	0	0	0	0	0	0	0	0	0	60	45.1718	127.045	364.416
0.2	7.27273	29.3888	29.1888	33		3.81124	849.068	1161.46	849.068	0	0	0	0	0	0	0	0	0	0	0	0	0	0	0	0	0		0	0	0	1161.46	0	0	0	0	0	0	0	0	0	0	0	0	0	0		2.39483	2.58654	2.88906
	43.1852		29.5888			3.41124	856.341	1118.28	856.341	0	0	0	0	0	0	0	0	0	0	0	0	0	0	0	0	0		0	0	0	1118.28	0	0	0	0	0	0	0	0	0	0	0	0	0	0		2.38114	2.56231	2.84669
0.5	18.1818		28.8888			4.11124	843.614	1187.44	843.614	0	0	0	0	0	0	0	0	0	0	0	0	0	0	0	0	0		0	0	0	1187.44	0	0	0	0	0	0	0	0	0	0	0	0	0	0		2.40559	2.60568	2.92268
	116.602		29.8888			3.11124	861.796	1070.84	861.796	0	0	0	0	0	0	0	0	0	0	0	0	0	0	0	0	0		0	0	1070.84	0	0	0	0	0	0	0	0	0	0	0	0	0	0	0		2.37135	2.54505	2.81664
1	36.3636		28.3888			4.61124	834.523	1216.91	834.523	0	0	0	0	0	0	0	0	0	0	0	0	0	0	0	0	0		0	0	0	0	1216.91	0	0	0	0	0	0	0	0	0	0	0	0	0		2.42453	2.63955	2.98251
	278.717		30.3888			2.61124	870.887	938.197	870.887	0	0	0	0	0	0	0	0	0	0	0	0	0	0	0	0	0		0	938.197	0	0	0	0	0	0	0	0	0	0	0	0	0	0	0	0		2.35586	2.5179	2.76963
1.25	45.4545		28.1388			4.86124	829.978	1227.49	829.978	0	0	0	0	0	0	0	0	0	0	0	0	0	0	0	0	0		0	0	0	0	1227.49	0	0	0	0	0	0	0	0	0	0	0	0	0		2.43449	2.65747	3.01431
	419.102		30.6388			2.36124	875.432	808.383	875.432	0	0	0	0	0	0	0	0	0	0	0	0	0	0	0	0	0		808.383	0	0	0	0	0	0	0	0	0	0	0	0	0	0	0	0	0		2.3485	2.50505	2.74748
2.5	90.9091		26.8888			6.11124	807.25	1259.36	807.25	0	0	0	0	0	0	0	0	0	0	0	0	0	0	0	0	0		0	0	0	0	1259.36	0	0	0	0	0	0	0	0	0	0	0	0	0		2.48989	2.7581	3.19486
	1259.36		31.8888			1.11124	898.159	0	898.159	0	0	0	0	0	0	0	0	0	0	0	0	0	0	0	0	0		0	0	0	0	0	0	0	0	0	0	0	0	0	0	0	0	0	0		2.31504	2.4472	2.6487
5	949.974		24.3888			8.61124	0	1263.28	0	0	0	0	0	0	0	0	0	0	0	0	0	0	0	0	0	0		0	0	0	0	1263.28	0	0	0	0	0	0	0	0	0	0	0	0	0		2.63558	3.0302	3.69684
	1263.28		34.3888			-1.38876	949.974	0	0	949.974	0	0	0	0	0	0	0	0	0	0	0	0	0	0	0	0		0	0	0	0	0	0	0	0	0	0	0	0	0	0	0	0	0	0		2.26203	2.35757	2.49898
							0	0	0	0	0	0	0	0	0	0	0	0	0	0	0	0	0	0	0	0		0	0	0	0	0	0	0	0	0	0	0	0	0	0	0	0	0	0		45.1718	127.045	364.416
0.2	7.27273	29.3888	29.1888	33.5		4.31124	849.068	1217.93	849.068	0	0	0	0	0	0	0	0	0	0	0	0	0	0	0	0	0		0	0	0	0	1217.93	0	0	0	0	0	0	0	0	0	0	0	0	0		2.39483	2.58654	2.88906
	28.7489		29.5888			3.91124	856.341	1189.19	856.341	0	0	0	0	0	0	0	0	0	0	0	0	0	0	0	0	0		0	0	0	1189.19	0	0	0	0	0	0	0	0	0	0	0	0	0	0		2.38114	2.56231	2.84669
0.5	18.1818		28.8888			4.61124	843.614	1233.88	843.614	0	0	0	0	0	0	0	0	0	0	0	0	0	0	0	0	0		0	0	0	0	1233.88	0	0	0	0	0	0	0	0	0	0	0	0	0		2.40559	2.60568	2.92268
	75.8792		29.8888			3.61124	861.796	1158	861.796	0	0	0	0	0	0	0	0	0	0	0	0	0	0	0	0	0		0	0	0	1158	0	0	0	0	0	0	0	0	0	0	0	0	0	0		2.37135	2.54505	2.81664
1	36.3636		28.3888			5.11124	834.523	1254.39	834.523	0	0	0	0	0	0	0	0	0	0	0	0	0	0	0	0	0		0	0	0	0	1254.39	0	0	0	0	0	0	0	0	0	0	0	0	0		2.42453	2.63955	2.98251
	166.332		30.3888			3.11124	870.887	1088.06	870.887	0	0	0	0	0	0	0	0	0	0	0	0	0	0	0	0	0		0	0	1088.06	0	0	0	0	0	0	0	0	0	0	0	0	0	0	0		2.35586	2.5179	2.76963
1.25	45.4545		28.1388			5.36124	829.978	1262.27	829.978	0	0	0	0	0	0	0	0	0	0	0	0	0	0	0	0	0		0	0	0	0	1262.27	0	0	0	0	0	0	0	0	0	0	0	0	0		2.43449	2.65747	3.01431
	230.59		30.6388			2.86124	875.432	1031.68	875.432	0	0	0	0	0	0	0	0	0	0	0	0	0	0	0	0	0		0	0	1031.68	0	0	0	0	0	0	0	0	0	0	0	0	0	0	0		2.3485	2.50505	2.74748
2.5	90.9091		26.8888			6.61124	807.25	1284.2	807.25	0	0	0	0	0	0	0	0	0	0	0	0	0	0	0	0	0		0	0	0	0	1284.2	0	0	0	0	0	0	0	0	0	0	0	0	0		2.48989	2.7581	3.19486
	1284.2		31.8888			1.61124	898.159	0	898.159	0	0	0	0	0	0	0	0	0	0	0	0	0	0	0	0	0		0	0	0	0	0	0	0	0	0	0	0	0	0	0	0	0	0	0		2.31504	2.4472	2.6487
5	949.974		24.3888			9.11124	0	1277.73	0	0	0	0	0	0	0	0	0	0	0	0	0	0	0	0	0	0		0	0	0	0	1277.73	0	0	0	0	0	0	0	0	0	0	0	0	0		2.63558	3.0302	3.69684
	1277.73		34.3888			-0.888764	949.974	0	0	949.974	0	0	0	0	0	0	0	0	0	0	0	0	0	0	0	0		0	0	0	0	0	0	0	0	0	0	0	0	0	0	0	0	0	0		2.26203	2.35757	2.49898
							0	0	0	0	0	0	0	0	0	0	0	0	0	0	0	0	0	0	0	0		0	0	0	0	0	0	0	0	0	0	0	0	0	0	0	0	0	0		45.1718	127.045	364.416
0.2	7.27273	29.3888	29.1888	34		4.81124	849.068	1261.22	849.068	0	0	0	0	0	0	0	0	0	0	0	0	0	0	0	0	0		0	0	0	0	1261.22	0	0	0	0	0	0	0	0	0	0	0	0	0		2.39483	2.58654	2.88906
	20.341		29.5888			4.41124	856.341	1240.88	856.341	0	0	0	0	0	0	0	0	0	0	0	0	0	0	0	0	0		0	0	0	0	1240.88	0	0	0	0	0	0	0	0	0	0	0	0	0		2.38114	2.56231	2.84669
0.5	18.1818		28.8888			5.11124	843.614	1273.28	843.614	0	0	0	0	0	0	0	0	0	0	0	0	0	0	0	0	0		0	0	0	0	1273.28	0	0	0	0	0	0	0	0	0	0	0	0	0		2.40559	2.60568	2.92268
	51.4634		29.8888			4.11124	861.796	1221.81	861.796	0	0	0	0	0	0	0	0	0	0	0	0	0	0	0	0	0		0	0	0	0	1221.81	0	0	0	0	0	0	0	0	0	0	0	0	0		2.37135	2.54505	2.81664
1	36.3636		28.3888			5.61124	834.523	1288.37	834.523	0	0	0	0	0	0	0	0	0	0	0	0	0	0	0	0	0		0	0	0	0	1288.37	0	0	0	0	0	0	0	0	0	0	0	0	0		2.42453	2.63955	2.98251
	112.57		30.3888			3.61124	870.887	1175.8	870.887	0	0	0	0	0	0	0	0	0	0	0	0	0	0	0	0	0		0	0	0	1175.8	0	0	0	0	0	0	0	0	0	0	0	0	0	0		2.35586	2.5179	2.76963
1.25	45.4545		28.1388			5.86124	829.978	1293.95	829.978	0	0	0	0	0	0	0	0	0	0	0	0	0	0	0	0	0		0	0	0	0	1293.95	0	0	0	0	0	0	0	0	0	0	0	0	0		2.43449	2.65747	3.01431
	150.862		30.6388			3.36124	875.432	1143.08	875.432	0	0	0	0	0	0	0	0	0	0	0	0	0	0	0	0	0		0	0	0	1143.08	0	0	0	0	0	0	0	0	0	0	0	0	0	0		2.3485	2.50505	2.74748
2.5	90.9091		26.8888			7.11124	807.25	1306.26	807.25	0	0	0	0	0	0	0	0	0	0	0	0	0	0	0	0	0		0	0	0	0	0	1306.26	0	0	0	0	0	0	0	0	0	0	0	0		2.48989	2.7581	3.19486
	1306.26		31.8888			2.11124	898.159	0	898.159	0	0	0	0	0	0	0	0	0	0	0	0	0	0	0	0	0		0	0	0	0	0	0	0	0	0	0	0	0	0	0	0	0	0	0		2.31504	2.4472	2.6487
5	949.974		24.3888			9.61124	0	1291.41	0	0	0	0	0	0	0	0	0	0	0	0	0	0	0	0	0	0		0	0	0	0	1291.41	0	0	0	0	0	0	0	0	0	0	0	0	0		2.63558	3.0302	3.69684
	1291.41		34.3888			-0.388764	949.974	0	0	949.974	0	0	0	0	0	0	0	0	0	0	0	0	0	0	0	0		0	0	0	0	0	0	0	0	0	0	0	0	0	0	0	0	0	0		2.26203	2.35757	2.49898
							0	0	0	0	0	0	0	0	0	0	0	0	0	0	0	0	0	0	0	0		0	0	0	0	0	0	0	0	0	0	0	0	0	0	0	0	0	0		45.1718	127.045	364.416
0.2	7.27273	29.3888	29.1888	34.564		5.37528	849.068	1304.15	849.068	0	0	0	0	0	0	0	0	0	0	0	0	0	0	0	0	0		0	0	0	0	0	1304.15	0	0	0	0	0	0	0	0	0	0	0	0		2.39483	2.58654	2.88906
	13.8017		29.5888			4.97528	856.341	1290.35	856.341	0	0	0	0	0	0	0	0	0	0	0	0	0	0	0	0	0		0	0	0	0	1290.35	0	0	0	0	0	0	0	0	0	0	0	0	0		2.38114	2.56231	2.84669
0.5	18.1818		28.8888			5.67528	843.614	1311.22	843.614	0	0	0	0	0	0	0	0	0	0	0	0	0	0	0	0	0		0	0	0	0	0	1311.22	0	0	0	0	0	0	0	0	0	0	0	0		2.40559	2.60568	2.92268
	34.8606		29.8888			4.67528	861.796	1276.35	861.796	0	0	0	0	0	0	0	0	0	0	0	0	0	0	0	0	0		0	0	0	0	1276.35	0	0	0	0	0	0	0	0	0	0	0	0	0		2.37135	2.54505	2.81664
1	36.3636		28.3888			6.17528	834.523	1319.69	834.523	0	0	0	0	0	0	0	0	0	0	0	0	0	0	0	0	0		0	0	0	0	0	1319.69	0	0	0	0	0	0	0	0	0	0	0	0		2.42453	2.63955	2.98251
	73.7844		30.3888			4.17528	870.887	1245.9	870.887	0	0	0	0	0	0	0	0	0	0	0	0	0	0	0	0	0		0	0	0	0	1245.9	0	0	0	0	0	0	0	0	0	0	0	0	0		2.35586	2.5179	2.76963
1.25	45.4545		28.1388			6.42528	829.978	1322.6	829.978	0	0	0	0	0	0	0	0	0	0	0	0	0	0	0	0	0		0	0	0	0	0	1322.6	0	0	0	0	0	0	0	0	0	0	0	0		2.43449	2.65747	3.01431
	95.9531		30.6388			3.92528	875.432	1226.64	875.432	0	0	0	0	0	0	0	0	0	0	0	0	0	0	0	0	0		0	0	0	0	1226.64	0	0	0	0	0	0	0	0	0	0	0	0	0		2.3485	2.50505	2.74748
2.5	90.9091		26.8888			7.67528	807.25	1327.11	807.25	0	0	0	0	0	0	0	0	0	0	0	0	0	0	0	0	0		0	0	0	0	0	1327.11	0	0	0	0	0	0	0	0	0	0	0	0		2.48989	2.7581	3.19486
	318.014		31.8888			2.67528	898.159	1009.1	898.159	0	0	0	0	0	0	0	0	0	0	0	0	0	0	0	0	0		0	0	1009.1	0	0	0	0	0	0	0	0	0	0	0	0	0	0	0		2.31504	2.4472	2.6487
5	949.974		24.3888			10.1753	0	1305.38	0	0	0	0	0	0	0	0	0	0	0	0	0	0	0	0	0	0		0	0	0	0	0	1305.38	0	0	0	0	0	0	0	0	0	0	0	0		2.63558	3.0302	3.69684
	1305.38		34.3888			0.175281	949.974	0	0	949.974	0	0	0	0	0	0	0	0	0	0	0	0	0	0	0	0		0	0	0	0	0	0	0	0	0	0	0	0	0	0	0	0	0	0		2.26203	2.35757	2.49898
							0	0	0	0	0	0	0	0	0	0	0	0	0	0	0	0	0	0	0	0		0	0	0	0	0	0	0	0	0	0	0	0	0	0	0	0	0	0		45.1718	127.045	364.416
0.2	7.27273	29.3888	29.1888	35		5.81124	849.068	1329.93	849.068	0	0	0	0	0	0	0	0	0	0	0	0	0	0	0	0	0		0	0	0	0	0	1329.93	0	0	0	0	0	0	0	0	0	0	0	0		2.39483	2.58654	2.88906
	9.18911		29.5888			5.41124	856.341	1320.74	856.341	0	0	0	0	0	0	0	0	0	0	0	0	0	0	0	0	0		0	0	0	0	0	1320.74	0	0	0	0	0	0	0	0	0	0	0	0		2.38114	2.56231	2.84669
0.5	18.1818		28.8888			6.11124	843.614	1335.04	843.614	0	0	0	0	0	0	0	0	0	0	0	0	0	0	0	0	0		0	0	0	0	0	1335.04	0	0	0	0	0	0	0	0	0	0	0	0		2.40559	2.60568	2.92268
	23.269		29.8888			5.11124	861.796	1311.77	861.796	0	0	0	0	0	0	0	0	0	0	0	0	0	0	0	0	0		0	0	0	0	0	1311.77	0	0	0	0	0	0	0	0	0	0	0	0		2.37135	2.54505	2.81664
1	36.3636		28.3888			6.61124	834.523	1340.72	834.523	0	0	0	0	0	0	0	0	0	0	0	0	0	0	0	0	0		0	0	0	0	0	1340.72	0	0	0	0	0	0	0	0	0	0	0	0		2.42453	2.63955	2.98251
	50.3832		30.3888			4.61124	870.887	1290.34	870.887	0	0	0	0	0	0	0	0	0	0	0	0	0	0	0	0	0		0	0	0	0	1290.34	0	0	0	0	0	0	0	0	0	0	0	0	0		2.35586	2.5179	2.76963
1.25	45.4545		28.1388			6.86124	829.978	1342.42	829.978	0	0	0	0	0	0	0	0	0	0	0	0	0	0	0	0	0		0	0	0	0	0	1342.42	0	0	0	0	0	0	0	0	0	0	0	0		2.43449	2.65747	3.01431
	67.364		30.6388			4.36124	875.432	1275.06	875.432	0	0	0	0	0	0	0	0	0	0	0	0	0	0	0	0	0		0	0	0	0	1275.06	0	0	0	0	0	0	0	0	0	0	0	0	0		2.3485	2.50505	2.74748
2.5	90.9091		26.8888			8.11124	807.25	1342.21	807.25	0	0	0	0	0	0	0	0	0	0	0	0	0	0	0	0	0		0	0	0	0	0	1342.21	0	0	0	0	0	0	0	0	0	0	0	0		2.48989	2.7581	3.19486
	207.389		31.8888			3.11124	898.159	1134.82	898.159	0	0	0	0	0	0	0	0	0	0	0	0	0	0	0	0	0		0	0	0	1134.82	0	0	0	0	0	0	0	0	0	0	0	0	0	0		2.31504	2.4472	2.6487
5	949.974		24.3888			10.6112	0	1315.01	0	0	0	0	0	0	0	0	0	0	0	0	0	0	0	0	0	0		0	0	0	0	0	1315.01	0	0	0	0	0	0	0	0	0	0	0	0		2.63558	3.0302	3.69684
	1315.01		34.3888			0.611236	949.974	0	0	949.974	0	0	0	0	0	0	0	0	0	0	0	0	0	0	0	0		0	0	0	0	0	0	0	0	0	0	0	0	0	0	0	0	0	0		2.26203	2.35757	2.49898
							0	0	0	0	0	0	0	0	0	0	0	0	0	0	0	0	0	0	0	0		0	0	0	0	0	0	0	0	0	0	0	0	0	0	0	0	0	0		45.1718	127.045	364.416
0.2	7.27273	29.3888	29.1888	36		6.81124	849.068	1382.41	849.068	0	0	0	0	0	0	0	0	0	0	0	0	0	0	0	0	0		0	0	0	0	0	1382.41	0	0	0	0	0	0	0	0	0	0	0	0		2.39483	2.58654	2.88906
	3.56689		29.5888			6.41124	856.341	1378.84	856.341	0	0	0	0	0	0	0	0	0	0	0	0	0	0	0	0	0		0	0	0	0	0	1378.84	0	0	0	0	0	0	0	0	0	0	0	0		2.38114	2.56231	2.84669
0.5	18.1818		28.8888			7.11124	843.614	1383.82	843.614	0	0	0	0	0	0	0	0	0	0	0	0	0	0	0	0	0		0	0	0	0	0	1383.82	0	0	0	0	0	0	0	0	0	0	0	0		2.40559	2.60568	2.92268
	9.11597		29.8888			6.11124	861.796	1374.7	861.796	0	0	0	0	0	0	0	0	0	0	0	0	0	0	0	0	0		0	0	0	0	0	1374.7	0	0	0	0	0	0	0	0	0	0	0	0		2.37135	2.54505	2.81664
1	36.3636		28.3888			7.61124	834.523	1384.15	834.523	0	0	0	0	0	0	0	0	0	0	0	0	0	0	0	0	0		0	0	0	0	0	1384.15	0	0	0	0	0	0	0	0	0	0	0	0		2.42453	2.63955	2.98251
	19.6715		30.3888			5.61124	870.887	1364.48	870.887	0	0	0	0	0	0	0	0	0	0	0	0	0	0	0	0	0		0	0	0	0	0	1364.48	0	0	0	0	0	0	0	0	0	0	0	0		2.35586	2.5179	2.76963
1.25	45.4545		28.1388			7.86124	829.978	1383.5	829.978	0	0	0	0	0	0	0	0	0	0	0	0	0	0	0	0	0		0	0	0	0	0	1383.5	0	0	0	0	0	0	0	0	0	0	0	0		2.43449	2.65747	3.01431
	25.9653		30.6388			5.36124	875.432	1357.54	875.432	0	0	0	0	0	0	0	0	0	0	0	0	0	0	0	0	0		0	0	0	0	0	1357.54	0	0	0	0	0	0	0	0	0	0	0	0		2.3485	2.50505	2.74748
2.5	90.9091		26.8888			9.11124	807.25	1373.98	807.25	0	0	0	0	0	0	0	0	0	0	0	0	0	0	0	0	0		0	0	0	0	0	1373.98	0	0	0	0	0	0	0	0	0	0	0	0		2.48989	2.7581	3.19486
	77.4446		31.8888			4.11124	898.159	1296.53	898.159	0	0	0	0	0	0	0	0	0	0	0	0	0	0	0	0	0		0	0	0	0	1296.53	0	0	0	0	0	0	0	0	0	0	0	0	0		2.31504	2.4472	2.6487
5	949.974		24.3888			11.6112	0	1335.67	0	0	0	0	0	0	0	0	0	0	0	0	0	0	0	0	0	0		0	0	0	0	0	1335.67	0	0	0	0	0	0	0	0	0	0	0	0		2.63558	3.0302	3.69684
	1335.67		34.3888			1.61124	949.974	0	0	949.974	0	0	0	0	0	0	0	0	0	0	0	0	0	0	0	0		0	0	0	0	0	0	0	0	0	0	0	0	0	0	0	0	0	0		2.26203	2.35757	2.49898
							0	0	0	0	0	0	0	0	0	0	0	0	0	0	0	0	0	0	0	0		0	0	0	0	0	0	0	0	0	0	0	0	0	0	0	0	0	0		45.1718	127.045	364.416
0.2	7.27273	29.3888	29.1888	37		7.81124	849.068	1424.28	849.068	0	0	0	0	0	0	0	0	0	0	0	0	0	0	0	0	0		0	0	0	0	0	0	1424.28	0	0	0	0	0	0	0	0	0	0	0		2.39483	2.58654	2.88906
	-0.585281		29.5888			7.41124	856.341	1424.87	856.341	0	0	0	0	0	0	0	0	0	0	0	0	0	0	0	0	0		0	0	0	0	0	0	1424.87	0	0	0	0	0	0	0	0	0	0	0		2.38114	2.56231	2.84669
0.5	18.1818		28.8888			8.11124	843.614	1423.05	843.614	0	0	0	0	0	0	0	0	0	0	0	0	0	0	0	0	0		0	0	0	0	0	0	1423.05	0	0	0	0	0	0	0	0	0	0	0		2.40559	2.60568	2.92268
	-1.35252		29.8888			7.11124	861.796	1424.4	861.796	0	0	0	0	0	0	0	0	0	0	0	0	0	0	0	0	0		0	0	0	0	0	0	1424.4	0	0	0	0	0	0	0	0	0	0	0		2.37135	2.54505	2.81664
1	36.3636		28.3888			8.61124	834.523	1419.69	834.523	0	0	0	0	0	0	0	0	0	0	0	0	0	0	0	0	0		0	0	0	0	0	0	1419.69	0	0	0	0	0	0	0	0	0	0	0		2.42453	2.63955	2.98251
	-1.90518		30.3888			6.61124	870.887	1421.6	870.887	0	0	0	0	0	0	0	0	0	0	0	0	0	0	0	0	0		0	0	0	0	0	0	1421.6	0	0	0	0	0	0	0	0	0	0	0		2.35586	2.5179	2.76963
1.25	45.4545		28.1388			8.86124	829.978	1417.48	829.978	0	0	0	0	0	0	0	0	0	0	0	0	0	0	0	0	0		0	0	0	0	0	0	1417.48	0	0	0	0	0	0	0	0	0	0	0		2.43449	2.65747	3.01431
	-1.61959		30.6388			6.36124	875.432	1419.1	875.432	0	0	0	0	0	0	0	0	0	0	0	0	0	0	0	0	0		0	0	0	0	0	0	1419.1	0	0	0	0	0	0	0	0	0	0	0		2.3485	2.50505	2.74748
2.5	90.9091		26.8888			10.1112	807.25	1402.2	807.25	0	0	0	0	0	0	0	0	0	0	0	0	0	0	0	0	0		0	0	0	0	0	0	1402.2	0	0	0	0	0	0	0	0	0	0	0		2.48989	2.7581	3.19486
	11.7876		31.8888			5.11124	898.159	1390.41	898.159	0	0	0	0	0	0	0	0	0	0	0	0	0	0	0	0	0		0	0	0	0	0	1390.41	0	0	0	0	0	0	0	0	0	0	0	0		2.31504	2.4472	2.6487
5	949.974		24.3888			12.6112	0	1354.63	0	0	0	0	0	0	0	0	0	0	0	0	0	0	0	0	0	0		0	0	0	0	0	1354.63	0	0	0	0	0	0	0	0	0	0	0	0		2.63558	3.0302	3.69684
	300.008		34.3888			2.61124	949.974	1054.62	0	949.974	0	0	0	0	0	0	0	0	0	0	0	0	0	0	0	0		0	0	1054.62	0	0	0	0	0	0	0	0	0	0	0	0	0	0	0		2.26203	2.35757	2.49898
							0	0	0	0	0	0	0	0	0	0	0	0	0	0	0	0	0	0	0	0		0	0	0	0	0	0	0	0	0	0	0	0	0	0	0	0	0	0		45.1718	127.045	364.416
0.2	7.27273	29.3888	29.1888	38		8.81124	849.068	1459.2	849.068	0	0	0	0	0	0	0	0	0	0	0	0	0	0	0	0	0		0	0	0	0	0	0	1459.2	0	0	0	0	0	0	0	0	0	0	0		2.39483	2.58654	2.88906
	-3.49845		29.5888			8.41124	856.341	1462.7	856.341	0	0	0	0	0	0	0	0	0	0	0	0	0	0	0	0	0		0	0	0	0	0	0	1462.7	0	0	0	0	0	0	0	0	0	0	0		2.38114	2.56231	2.84669
0.5	18.1818		28.8888			9.11124	843.614	1456	843.614	0	0	0	0	0	0	0	0	0	0	0	0	0	0	0	0	0		0	0	0	0	0	0	1456	0	0	0	0	0	0	0	0	0	0	0		2.40559	2.60568	2.92268
	-8.6666		29.8888			8.11124	861.796	1464.67	861.796	0	0	0	0	0	0	0	0	0	0	0	0	0	0	0	0	0		0	0	0	0	0	0	1464.67	0	0	0	0	0	0	0	0	0	0	0		2.37135	2.54505	2.81664
1	36.3636		28.3888			9.61124	834.523	1449.72	834.523	0	0	0	0	0	0	0	0	0	0	0	0	0	0	0	0	0		0	0	0	0	0	0	1449.72	0	0	0	0	0	0	0	0	0	0	0		2.42453	2.63955	2.98251
	-16.7593		30.3888			7.61124	870.887	1466.48	870.887	0	0	0	0	0	0	0	0	0	0	0	0	0	0	0	0	0		0	0	0	0	0	0	1466.48	0	0	0	0	0	0	0	0	0	0	0		2.35586	2.5179	2.76963
1.25	45.4545		28.1388			9.86124	829.978	1446.2	829.978	0	0	0	0	0	0	0	0	0	0	0	0	0	0	0	0	0		0	0	0	0	0	0	1446.2	0	0	0	0	0	0	0	0	0	0	0		2.43449	2.65747	3.01431
	-20.4035		30.6388			7.36124	875.432	1466.6	875.432	0	0	0	0	0	0	0	0	0	0	0	0	0	0	0	0	0		0	0	0	0	0	0	1466.6	0	0	0	0	0	0	0	0	0	0	0		2.3485	2.50505	2.74748
2.5	90.9091		26.8888			11.1112	807.25	1425.5	807.25	0	0	0	0	0	0	0	0	0	0	0	0	0	0	0	0	0		0	0	0	0	0	0	1425.5	0	0	0	0	0	0	0	0	0	0	0		2.48989	2.7581	3.19486
	-31.1825		31.8888			6.11124	898.159	1456.68	898.159	0	0	0	0	0	0	0	0	0	0	0	0	0	0	0	0	0		0	0	0	0	0	0	1456.68	0	0	0	0	0	0	0	0	0	0	0		2.31504	2.4472	2.6487
5	949.974		24.3888			13.6112	0	1372.14	0	0	0	0	0	0	0	0	0	0	0	0	0	0	0	0	0	0		0	0	0	0	0	1372.14	0	0	0	0	0	0	0	0	0	0	0	0		2.63558	3.0302	3.69684
	50.8737		34.3888			3.61124	949.974	1321.27	0	949.974	0	0	0	0	0	0	0	0	0	0	0	0	0	0	0	0		0	0	0	0	0	1321.27	0	0	0	0	0	0	0	0	0	0	0	0		2.26203	2.35757	2.49898
							0	0	0	0	0	0	0	0	0	0	0	0	0	0	0	0	0	0	0	0		0	0	0	0	0	0	0	0	0	0	0	0	0	0	0	0	0	0		45.1718	127.045	364.416
0.2	7.27273	29.3888	29.1888	39		9.81124	849.068	1490.36	849.068	0	0	0	0	0	0	0	0	0	0	0	0	0	0	0	0	0		0	0	0	0	0	0	1490.36	0	0	0	0	0	0	0	0	0	0	0		2.39483	2.58654	2.88906
	-5.91454		29.5888			9.41124	856.341	1496.28	856.341	0	0	0	0	0	0	0	0	0	0	0	0	0	0	0	0	0		0	0	0	0	0	0	1496.28	0	0	0	0	0	0	0	0	0	0	0		2.38114	2.56231	2.84669
0.5	18.1818		28.8888			10.1112	843.614	1485.52	843.614	0	0	0	0	0	0	0	0	0	0	0	0	0	0	0	0	0		0	0	0	0	0	0	1485.52	0	0	0	0	0	0	0	0	0	0	0		2.40559	2.60568	2.92268
	-14.7047		29.8888			9.11124	861.796	1500.22	861.796	0	0	0	0	0	0	0	0	0	0	0	0	0	0	0	0	0		0	0	0	0	0	0	0	1500.22	0	0	0	0	0	0	0	0	0	0		2.37135	2.54505	2.81664
1	36.3636		28.3888			10.6112	834.523	1476.78	834.523	0	0	0	0	0	0	0	0	0	0	0	0	0	0	0	0	0		0	0	0	0	0	0	1476.78	0	0	0	0	0	0	0	0	0	0	0		2.42453	2.63955	2.98251
	-28.4453		30.3888			8.61124	870.887	1505.22	870.887	0	0	0	0	0	0	0	0	0	0	0	0	0	0	0	0	0		0	0	0	0	0	0	0	1505.22	0	0	0	0	0	0	0	0	0	0		2.35586	2.5179	2.76963
1.25	45.4545		28.1388			10.8612	829.978	1472.13	829.978	0	0	0	0	0	0	0	0	0	0	0	0	0	0	0	0	0		0	0	0	0	0	0	1472.13	0	0	0	0	0	0	0	0	0	0	0		2.43449	2.65747	3.01431
	-35.0599		30.6388			8.36124	875.432	1507.19	875.432	0	0	0	0	0	0	0	0	0	0	0	0	0	0	0	0	0		0	0	0	0	0	0	0	1507.19	0	0	0	0	0	0	0	0	0	0		2.3485	2.50505	2.74748
2.5	90.9091		26.8888			12.1112	807.25	1446.78	807.25	0	0	0	0	0	0	0	0	0	0	0	0	0	0	0	0	0		0	0	0	0	0	0	1446.78	0	0	0	0	0	0	0	0	0	0	0		2.48989	2.7581	3.19486
	-63.4694		31.8888			7.11124	898.159	1510.25	898.159	0	0	0	0	0	0	0	0	0	0	0	0	0	0	0	0	0		0	0	0	0	0	0	0	1510.25	0	0	0	0	0	0	0	0	0	0		2.31504	2.4472	2.6487
5	949.974		24.3888			14.6112	0	1388.41	0	0	0	0	0	0	0	0	0	0	0	0	0	0	0	0	0	0		0	0	0	0	0	1388.41	0	0	0	0	0	0	0	0	0	0	0	0		2.63558	3.0302	3.69684
	-59.6157		34.3888			4.61124	949.974	1448.02	0	949.974	0	0	0	0	0	0	0	0	0	0	0	0	0	0	0	0		0	0	0	0	0	0	1448.02	0	0	0	0	0	0	0	0	0	0	0		2.26203	2.35757	2.49898
							0	0	0	0	0	0	0	0	0	0	0	0	0	0	0	0	0	0	0	0		0	0	0	0	0	0	0	0	0	0	0	0	0	0	0	0	0	0		45.1718	127.045	364.416
0.2	7.27273	29.3888	29.1888	44		14.8112	849.068	1599.98	849.068	0	0	0	0	0	0	0	0	0	0	0	0	0	0	0	0	0		0	0	0	0	0	0	0	1599.98	0	0	0	0	0	0	0	0	0	0		2.39483	2.58654	2.88906
	-11.3215		29.5888			14.4112	856.341	1611.3	856.341	0	0	0	0	0	0	0	0	0	0	0	0	0	0	0	0	0		0	0	0	0	0	0	0	0	1611.3	0	0	0	0	0	0	0	0	0		2.38114	2.56231	2.84669
0.5	18.1818		28.8888			15.1112	843.614	1590.87	843.614	0	0	0	0	0	0	0	0	0	0	0	0	0	0	0	0	0		0	0	0	0	0	0	0	1590.87	0	0	0	0	0	0	0	0	0	0		2.40559	2.60568	2.92268
	-28.8339		29.8888			14.1112	861.796	1619.71	861.796	0	0	0	0	0	0	0	0	0	0	0	0	0	0	0	0	0		0	0	0	0	0	0	0	0	1619.71	0	0	0	0	0	0	0	0	0		2.37135	2.54505	2.81664
1	36.3636		28.3888			15.6112	834.523	1575.68	834.523	0	0	0	0	0	0	0	0	0	0	0	0	0	0	0	0	0		0	0	0	0	0	0	0	1575.68	0	0	0	0	0	0	0	0	0	0		2.42453	2.63955	2.98251
	-57.8629		30.3888			13.6112	870.887	1633.54	870.887	0	0	0	0	0	0	0	0	0	0	0	0	0	0	0	0	0		0	0	0	0	0	0	0	0	1633.54	0	0	0	0	0	0	0	0	0		2.35586	2.5179	2.76963
1.25	45.4545		28.1388			15.8612	829.978	1568.07	829.978	0	0	0	0	0	0	0	0	0	0	0	0	0	0	0	0	0		0	0	0	0	0	0	0	1568.07	0	0	0	0	0	0	0	0	0	0		2.43449	2.65747	3.01431
	-72.289		30.6388			13.3612	875.432	1640.36	875.432	0	0	0	0	0	0	0	0	0	0	0	0	0	0	0	0	0		0	0	0	0	0	0	0	0	1640.36	0	0	0	0	0	0	0	0	0		2.3485	2.50505	2.74748
2.5	90.9091		26.8888			17.1112	807.25	1530.05	807.25	0	0	0	0	0	0	0	0	0	0	0	0	0	0	0	0	0		0	0	0	0	0	0	0	1530.05	0	0	0	0	0	0	0	0	0	0		2.48989	2.7581	3.19486
	-143.23		31.8888			12.1112	898.159	1673.28	898.159	0	0	0	0	0	0	0	0	0	0	0	0	0	0	0	0	0		0	0	0	0	0	0	0	0	1673.28	0	0	0	0	0	0	0	0	0		2.31504	2.4472	2.6487
5	949.974		24.3888			19.6112	0	1452.09	0	0	0	0	0	0	0	0	0	0	0	0	0	0	0	0	0	0		0	0	0	0	0	0	1452.09	0	0	0	0	0	0	0	0	0	0	0		2.63558	3.0302	3.69684
	-274.217		34.3888			9.61124	949.974	1726.31	0	949.974	0	0	0	0	0	0	0	0	0	0	0	0	0	0	0	0		0	0	0	0	0	0	0	0	0	1726.31	0	0	0	0	0	0	0	0		2.26203	2.35757	2.49898
							0	0	0	0	0	0	0	0	0	0	0	0	0	0	0	0	0	0	0	0		0	0	0	0	0	0	0	0	0	0	0	0	0	0	0	0	0	0		45.1718	127.045	364.416
0.2	7.27273	29.3888	29.1888	49		19.8112	849.068	1672.02	849.068	0	0	0	0	0	0	0	0	0	0	0	0	0	0	0	0	0		0	0	0	0	0	0	0	0	1672.02	0	0	0	0	0	0	0	0	0		2.39483	2.58654	2.88906
	-14.6857		29.5888			19.4112	856.341	1686.7	856.341	0	0	0	0	0	0	0	0	0	0	0	0	0	0	0	0	0		0	0	0	0	0	0	0	0	1686.7	0	0	0	0	0	0	0	0	0		2.38114	2.56231	2.84669
0.5	18.1818		28.8888			20.1112	843.614	1661.08	843.614	0	0	0	0	0	0	0	0	0	0	0	0	0	0	0	0	0		0	0	0	0	0	0	0	0	1661.08	0	0	0	0	0	0	0	0	0		2.40559	2.60568	2.92268
	-36.7188		29.8888			19.1112	861.796	1697.8	861.796	0	0	0	0	0	0	0	0	0	0	0	0	0	0	0	0	0		0	0	0	0	0	0	0	0	1697.8	0	0	0	0	0	0	0	0	0		2.37135	2.54505	2.81664
1	36.3636		28.3888			20.6112	834.523	1643	834.523	0	0	0	0	0	0	0	0	0	0	0	0	0	0	0	0	0		0	0	0	0	0	0	0	0	1643	0	0	0	0	0	0	0	0	0		2.42453	2.63955	2.98251
	-72.6293		30.3888			18.6112	870.887	1715.63	870.887	0	0	0	0	0	0	0	0	0	0	0	0	0	0	0	0	0		0	0	0	0	0	0	0	0	0	1715.63	0	0	0	0	0	0	0	0		2.35586	2.5179	2.76963
1.25	45.4545		28.1388			20.8612	829.978	1634.03	829.978	0	0	0	0	0	0	0	0	0	0	0	0	0	0	0	0	0		0	0	0	0	0	0	0	0	1634.03	0	0	0	0	0	0	0	0	0		2.43449	2.65747	3.01431
	-90.4942		30.6388			18.3612	875.432	1724.52	875.432	0	0	0	0	0	0	0	0	0	0	0	0	0	0	0	0	0		0	0	0	0	0	0	0	0	0	1724.52	0	0	0	0	0	0	0	0		2.3485	2.50505	2.74748
2.5	90.9091		26.8888			22.1112	807.25	1589.23	807.25	0	0	0	0	0	0	0	0	0	0	0	0	0	0	0	0	0		0	0	0	0	0	0	0	1589.23	0	0	0	0	0	0	0	0	0	0		2.48989	2.7581	3.19486
	-179.984		31.8888			17.1112	898.159	1769.22	898.159	0	0	0	0	0	0	0	0	0	0	0	0	0	0	0	0	0		0	0	0	0	0	0	0	0	0	1769.22	0	0	0	0	0	0	0	0		2.31504	2.4472	2.6487
5	949.974		24.3888			24.6112	0	1500.59	0	0	0	0	0	0	0	0	0	0	0	0	0	0	0	0	0	0		0	0	0	0	0	0	0	1500.59	0	0	0	0	0	0	0	0	0	0		2.63558	3.0302	3.69684
	-355.41		34.3888			14.6112	949.974	1856	0	949.974	0	0	0	0	0	0	0	0	0	0	0	0	0	0	0	0		0	0	0	0	0	0	0	0	0	0	1856	0	0	0	0	0	0	0		2.26203	2.35757	2.49898
							0	0	0	0	0	0	0	0	0	0	0	0	0	0	0	0	0	0	0	0		0	0	0	0	0	0	0	0	0	0	0	0	0	0	0	0	0	0		45.1718	127.045	364.416
0.2	7.27273	29.3888	29.1888	54		24.8112	849.068	1726.59	849.068	0	0	0	0	0	0	0	0	0	0	0	0	0	0	0	0	0		0	0	0	0	0	0	0	0	0	1726.59	0	0	0	0	0	0	0	0		2.39483	2.58654	2.88906
	-16.1285		29.5888			24.4112	856.341	1742.72	856.341	0	0	0	0	0	0	0	0	0	0	0	0	0	0	0	0	0		0	0	0	0	0	0	0	0	0	1742.72	0	0	0	0	0	0	0	0		2.38114	2.56231	2.84669
0.5	18.1818		28.8888			25.1112	843.614	1714.6	843.614	0	0	0	0	0	0	0	0	0	0	0	0	0	0	0	0	0		0	0	0	0	0	0	0	0	0	1714.6	0	0	0	0	0	0	0	0		2.40559	2.60568	2.92268
	-40.3277		29.8888			24.1112	861.796	1754.92	861.796	0	0	0	0	0	0	0	0	0	0	0	0	0	0	0	0	0		0	0	0	0	0	0	0	0	0	1754.92	0	0	0	0	0	0	0	0		2.37135	2.54505	2.81664
1	-124.523		28.3888			25.6112	834.523	1694.59	834.523	0	0	0	0	0	0	0	0	0	0	0	0	0	0	0	0	0		0	0	0	0	0	0	0	0	1694.59	0	0	0	0	0	0	0	0	0		2.42453	2.63955	2.98251
	-80.8998		30.3888			23.6112	710	1775.49	870.887	0	0	0	0	0	0	0	0	0	0	0	0	0	0	0	0	0		0	0	0	0	0	0	0	0	0	1775.49	0	0	0	0	0	0	0	0		2.35586	2.5179	2.76963
1.25	45.4545		28.1388			25.8612	829.978	1684.41	829.978	0	0	0	0	0	0	0	0	0	0	0	0	0	0	0	0	0		0	0	0	0	0	0	0	0	1684.41	0	0	0	0	0	0	0	0	0		2.43449	2.65747	3.01431
	-101.466		30.6388			23.3612	875.432	1785.88	875.432	0	0	0	0	0	0	0	0	0	0	0	0	0	0	0	0	0		0	0	0	0	0	0	0	0	0	1785.88	0	0	0	0	0	0	0	0		2.3485	2.50505	2.74748
2.5	90.9091		26.8888			27.1112	807.25	1634.73	807.25	0	0	0	0	0	0	0	0	0	0	0	0	0	0	0	0	0		0	0	0	0	0	0	0	0	1634.73	0	0	0	0	0	0	0	0	0		2.48989	2.7581	3.19486
	-202.625		31.8888			22.1112	898.159	1837.36	898.159	0	0	0	0	0	0	0	0	0	0	0	0	0	0	0	0	0		0	0	0	0	0	0	0	0	0	0	1837.36	0	0	0	0	0	0	0		2.31504	2.4472	2.6487
5	949.974		24.3888			29.6112	0	1538.38	0	0	0	0	0	0	0	0	0	0	0	0	0	0	0	0	0	0		0	0	0	0	0	0	0	1538.38	0	0	0	0	0	0	0	0	0	0		2.63558	3.0302	3.69684
	-403.329		34.3888			19.6112	949.974	1941.71	0	949.974	0	0	0	0	0	0	0	0	0	0	0	0	0	0	0	0		0	0	0	0	0	0	0	0	0	0	0	1941.71	0	0	0	0	0	0		2.26203	2.35757	2.49898
							0	0	0	0	0	0	0	0	0	0	0	0	0	0	0	0	0	0	0	0		0	0	0	0	0	0	0	0	0	0	0	0	0	0	0	0	0	0		45.1718	127.045	364.416
0.2	7.27273	29.3888	29.1888	59		29.8112	849.068	1770.15	849.068	0	0	0	0	0	0	0	0	0	0	0	0	0	0	0	0	0		0	0	0	0	0	0	0	0	0	1770.15	0	0	0	0	0	0	0	0		2.39483	2.58654	2.88906
	-17.6232		29.5888			29.4112	856.341	1787.78	856.341	0	0	0	0	0	0	0	0	0	0	0	0	0	0	0	0	0		0	0	0	0	0	0	0	0	0	1787.78	0	0	0	0	0	0	0	0		2.38114	2.56231	2.84669
0.5	18.1818		28.8888			30.1112	843.614	1757.09	843.614	0	0	0	0	0	0	0	0	0	0	0	0	0	0	0	0	0		0	0	0	0	0	0	0	0	0	1757.09	0	0	0	0	0	0	0	0		2.40559	2.60568	2.92268
	-44.0315		29.8888			29.1112	861.796	1801.12	861.796	0	0	0	0	0	0	0	0	0	0	0	0	0	0	0	0	0		0	0	0	0	0	0	0	0	0	0	1801.12	0	0	0	0	0	0	0		2.37135	2.54505	2.81664
1	36.3636		28.3888			30.6112	834.523	1735.59	834.523	0	0	0	0	0	0	0	0	0	0	0	0	0	0	0	0	0		0	0	0	0	0	0	0	0	0	1735.59	0	0	0	0	0	0	0	0		2.42453	2.63955	2.98251
	-87.3829		30.3888			28.6112	870.887	1822.97	870.887	0	0	0	0	0	0	0	0	0	0	0	0	0	0	0	0	0		0	0	0	0	0	0	0	0	0	0	1822.97	0	0	0	0	0	0	0		2.35586	2.5179	2.76963
1.25	45.4545		28.1388			30.8612	829.978	1724.96	829.978	0	0	0	0	0	0	0	0	0	0	0	0	0	0	0	0	0		0	0	0	0	0	0	0	0	0	1724.96	0	0	0	0	0	0	0	0		2.43449	2.65747	3.01431
	-109.049		30.6388			28.3612	875.432	1834.01	875.432	0	0	0	0	0	0	0	0	0	0	0	0	0	0	0	0	0		0	0	0	0	0	0	0	0	0	0	1834.01	0	0	0	0	0	0	0		2.3485	2.50505	2.74748
2.5	90.9091		26.8888			32.1112	807.25	1672.13	807.25	0	0	0	0	0	0	0	0	0	0	0	0	0	0	0	0	0		0	0	0	0	0	0	0	0	1672.13	0	0	0	0	0	0	0	0	0		2.48989	2.7581	3.19486
	-218.326		31.8888			27.1112	898.159	1890.45	898.159	0	0	0	0	0	0	0	0	0	0	0	0	0	0	0	0	0		0	0	0	0	0	0	0	0	0	0	1890.45	0	0	0	0	0	0	0		2.31504	2.4472	2.6487
5	949.974		24.3888			34.6112	0	1570.26	0	0	0	0	0	0	0	0	0	0	0	0	0	0	0	0	0	0		0	0	0	0	0	0	0	1570.26	0	0	0	0	0	0	0	0	0	0		2.63558	3.0302	3.69684
	-435.782		34.3888			24.6112	949.974	2006.04	0	949.974	0	0	0	0	0	0	0	0	0	0	0	0	0	0	0	0		0	0	0	0	0	0	0	0	0	0	0	0	2006.04	0	0	0	0	0		2.26203	2.35757	2.49898
							0	0	0	0	0	0	0	0	0	0	0	0	0	0	0	0	0	0	0	0		0	0	0	0	0	0	0	0	0	0	0	0	0	0	0	0	0	0		45.1718	127.045	364.416
0.2	7.27273	29.3888	29.1888	64		34.8112	849.068	1806.75	849.068	0	0	0	0	0	0	0	0	0	0	0	0	0	0	0	0	0		0	0	0	0	0	0	0	0	0	0	1806.75	0	0	0	0	0	0	0		2.39483	2.58654	2.88906
	-18.2183		29.5888			34.4112	856.341	1824.97	856.341	0	0	0	0	0	0	0	0	0	0	0	0	0	0	0	0	0		0	0	0	0	0	0	0	0	0	0	1824.97	0	0	0	0	0	0	0		2.38114	2.56231	2.84669
0.5	18.1818		28.8888			35.1112	843.614	1793.04	843.614	0	0	0	0	0	0	0	0	0	0	0	0	0	0	0	0	0		0	0	0	0	0	0	0	0	0	1793.04	0	0	0	0	0	0	0	0		2.40559	2.60568	2.92268
	-45.7361		29.8888			34.1112	861.796	1838.78	861.796	0	0	0	0	0	0	0	0	0	0	0	0	0	0	0	0	0		0	0	0	0	0	0	0	0	0	0	1838.78	0	0	0	0	0	0	0		2.37135	2.54505	2.81664
1	36.3636		28.3888			35.6112	834.523	1770.21	834.523	0	0	0	0	0	0	0	0	0	0	0	0	0	0	0	0	0		0	0	0	0	0	0	0	0	0	1770.21	0	0	0	0	0	0	0	0		2.42453	2.63955	2.98251
	-91.8703		30.3888			33.6112	870.887	1862.08	870.887	0	0	0	0	0	0	0	0	0	0	0	0	0	0	0	0	0		0	0	0	0	0	0	0	0	0	0	1862.08	0	0	0	0	0	0	0		2.35586	2.5179	2.76963
1.25	45.4545		28.1388			35.8612	829.978	1758.95	829.978	0	0	0	0	0	0	0	0	0	0	0	0	0	0	0	0	0		0	0	0	0	0	0	0	0	0	1758.95	0	0	0	0	0	0	0	0		2.43449	2.65747	3.01431
	-114.932		30.6388			33.3612	875.432	1873.88	875.432	0	0	0	0	0	0	0	0	0	0	0	0	0	0	0	0	0		0	0	0	0	0	0	0	0	0	0	1873.88	0	0	0	0	0	0	0		2.3485	2.50505	2.74748
2.5	90.9091		26.8888			37.1112	807.25	1703.98	807.25	0	0	0	0	0	0	0	0	0	0	0	0	0	0	0	0	0		0	0	0	0	0	0	0	0	0	1703.98	0	0	0	0	0	0	0	0		2.48989	2.7581	3.19486
	-229.487		31.8888			32.1112	898.159	1933.47	898.159	0	0	0	0	0	0	0	0	0	0	0	0	0	0	0	0	0		0	0	0	0	0	0	0	0	0	0	0	1933.47	0	0	0	0	0	0		2.31504	2.4472	2.6487
5	949.974		24.3888			39.6112	0	1597.83	0	0	0	0	0	0	0	0	0	0	0	0	0	0	0	0	0	0		0	0	0	0	0	0	0	1597.83	0	0	0	0	0	0	0	0	0	0		2.63558	3.0302	3.69684
	-459.022		34.3888			29.6112	949.974	2056.85	0	949.974	0	0	0	0	0	0	0	0	0	0	0	0	0	0	0	0		0	0	0	0	0	0	0	0	0	0	0	0	2056.85	0	0	0	0	0		2.26203	2.35757	2.49898
							0	0	0	0	0	0	0	0	0	0	0	0	0	0	0	0	0	0	0	0		0	0	0	0	0	0	0	0	0	0	0	0	0	0	0	0	0	0		45.1718	127.045	364.416
0.2	7.27273	29.3888	29.1888	69		39.8112	849.068	1837.71	849.068	0	0	0	0	0	0	0	0	0	0	0	0	0	0	0	0	0		0	0	0	0	0	0	0	0	0	0	1837.71	0	0	0	0	0	0	0		2.39483	2.58654	2.88906
	-19.0805		29.5888			39.4112	856.341	1856.79	856.341	0	0	0	0	0	0	0	0	0	0	0	0	0	0	0	0	0		0	0	0	0	0	0	0	0	0	0	1856.79	0	0	0	0	0	0	0		2.38114	2.56231	2.84669
0.5	18.1818		28.8888			40.1112	843.614	1823.56	843.614	0	0	0	0	0	0	0	0	0	0	0	0	0	0	0	0	0		0	0	0	0	0	0	0	0	0	0	1823.56	0	0	0	0	0	0	0		2.40559	2.60568	2.92268
	-47.7104		29.8888			39.1112	861.796	1871.27	861.796	0	0	0	0	0	0	0	0	0	0	0	0	0	0	0	0	0		0	0	0	0	0	0	0	0	0	0	1871.27	0	0	0	0	0	0	0		2.37135	2.54505	2.81664
1	36.3636		28.3888			40.6112	834.523	1800.27	834.523	0	0	0	0	0	0	0	0	0	0	0	0	0	0	0	0	0		0	0	0	0	0	0	0	0	0	0	1800.27	0	0	0	0	0	0	0		2.42453	2.63955	2.98251
	-95.4866		30.3888			38.6112	870.887	1895.75	870.887	0	0	0	0	0	0	0	0	0	0	0	0	0	0	0	0	0		0	0	0	0	0	0	0	0	0	0	1895.75	0	0	0	0	0	0	0		2.35586	2.5179	2.76963
1.25	45.4545		28.1388			40.8612	829.978	1788.49	829.978	0	0	0	0	0	0	0	0	0	0	0	0	0	0	0	0	0		0	0	0	0	0	0	0	0	0	1788.49	0	0	0	0	0	0	0	0		2.43449	2.65747	3.01431
	-119.482		30.6388			38.3612	875.432	1907.97	875.432	0	0	0	0	0	0	0	0	0	0	0	0	0	0	0	0	0		0	0	0	0	0	0	0	0	0	0	0	1907.97	0	0	0	0	0	0		2.3485	2.50505	2.74748
2.5	90.9091		26.8888			42.1112	807.25	1731.14	807.25	0	0	0	0	0	0	0	0	0	0	0	0	0	0	0	0	0		0	0	0	0	0	0	0	0	0	1731.14	0	0	0	0	0	0	0	0		2.48989	2.7581	3.19486
	-238.865		31.8888			37.1112	898.159	1970	898.159	0	0	0	0	0	0	0	0	0	0	0	0	0	0	0	0	0		0	0	0	0	0	0	0	0	0	0	0	1970	0	0	0	0	0	0		2.31504	2.4472	2.6487
5	949.974		24.3888			44.6112	0	1621.52	0	0	0	0	0	0	0	0	0	0	0	0	0	0	0	0	0	0		0	0	0	0	0	0	0	0	1621.52	0	0	0	0	0	0	0	0	0		2.63558	3.0302	3.69684
	-478.197		34.3888			34.6112	949.974	2099.72	0	949.974	0	0	0	0	0	0	0	0	0	0	0	0	0	0	0	0		0	0	0	0	0	0	0	0	0	0	0	0	2099.72	0	0	0	0	0		2.26203	2.35757	2.49898
							0	0	0	0	0	0	0	0	0	0	0	0	0	0	0	0	0	0	0	0		0	0	0	0	0	0	0	0	0	0	0	0	0	0	0	0	0	0		45.1718	127.045	364.416
							0	0	0	0	0	0	0	0	0	0	0	0	0	0	0	0	0	0	0	0		0	0	0	0	0	0	0	0	0	0	0	0	0	0	0	0	0	0		45.1718	127.045	364.416
							0	0	0	0	0	0	0	0	0	0	0	0	0	0	0	0	0	0	0	0		0	0	0	0	0	0	0	0	0	0	0	0	0	0	0	0	0	0		45.1718	127.045	364.416
							0	0	0	0	0	0	0	0	0	0	0	0	0	0	0	0	0	0	0	0		0	0	0	0	0	0	0	0	0	0	0	0	0	0	0	0	0	0		45.1718	127.045	364.416
							0	0	0	0	0	0	0	0	0	0	0	0	0	0	0	0	0	0	0	0		0	0	0	0	0	0	0	0	0	0	0	0	0	0	0	0	0	0		45.1718	127.045	364.416
							0	0	0	0	0	0	0	0	0	0	0	0	0	0	0	0	0	0	0	0		0	0	0	0	0	0	0	0	0	0	0	0	0	0	0	0	0	0		45.1718	127.045	364.416
							0	0	0	0	0	0	0	0	0	0	0	0	0	0	0	0	0	0	0	0		0	0	0	0	0	0	0	0	0	0	0	0	0	0	0	0	0	0		45.1718	127.045	364.416
							0	0	0	0	0	0	0	0	0	0	0	0	0	0	0	0	0	0	0	0		0	0	0	0	0	0	0	0	0	0	0	0	0	0	0	0	0	0		45.1718	127.045	364.416
							0	0	0	0	0	0	0	0	0	0	0	0	0	0	0	0	0	0	0	0		0	0	0	0	0	0	0	0	0	0	0	0	0	0	0	0	0	0		45.1718	127.045	364.416
							0	0	0	0	0	0	0	0	0	0	0	0	0	0	0	0	0	0	0	0		0	0	0	0	0	0	0	0	0	0	0	0	0	0	0	0	0	0		45.1718	127.045	364.416
							0	0	0	0	0	0	0	0	0	0	0	0	0	0	0	0	0	0	0	0		0	0	0	0	0	0	0	0	0	0	0	0	0	0	0	0	0	0		45.1718	127.045	364.416
							0	0	0	0	0	0	0	0	0	0	0	0	0	0	0	0	0	0	0	0		0	0	0	0	0	0	0	0	0	0	0	0	0	0	0	0	0	0		45.1718	127.045	364.416
							0	0	0	0	0	0	0	0	0	0	0	0	0	0	0	0	0	0	0	0		0	0	0	0	0	0	0	0	0	0	0	0	0	0	0	0	0	0		45.1718	127.045	364.416
							0	0	0	0	0	0	0	0	0	0	0	0	0	0	0	0	0	0	0	0		0	0	0	0	0	0	0	0	0	0	0	0	0	0	0	0	0	0		45.1718	127.045	364.416
							0	0	0	0	0	0	0	0	0	0	0	0	0	0	0	0	0	0	0	0		0	0	0	0	0	0	0	0	0	0	0	0	0	0	0	0	0	0		45.1718	127.045	364.416
							0	0	0	0	0	0	0	0	0	0	0	0	0	0	0	0	0	0	0	0		0	0	0	0	0	0	0	0	0	0	0	0	0	0	0	0	0	0		45.1718	127.045	364.416
							0	0	0	0	0	0	0	0	0	0	0	0	0	0	0	0	0	0	0	0		0	0	0	0	0	0	0	0	0	0	0	0	0	0	0	0	0	0		45.1718	127.045	364.416
							0	0	0	0	0	0	0	0	0	0	0	0	0	0	0	0	0	0	0	0		0	0	0	0	0	0	0	0	0	0	0	0	0	0	0	0	0	0		45.1718	127.045	364.416
							0	0	0	0	0	0	0	0	0	0	0	0	0	0	0	0	0	0	0	0		0	0	0	0	0	0	0	0	0	0	0	0	0	0	0	0	0	0		45.1718	127.045	364.416
							0	0	0	0	0	0	0	0	0	0	0	0	0	0	0	0	0	0	0	0		0	0	0	0	0	0	0	0	0	0	0	0	0	0	0	0	0	0		45.1718	127.045	364.416
							0	0	0	0	0	0	0	0	0	0	0	0	0	0	0	0	0	0	0	0		0	0	0	0	0	0	0	0	0	0	0	0	0	0	0	0	0	0		45.1718	127.045	364.416
							0	0	0	0	0	0	0	0	0	0	0	0	0	0	0	0	0	0	0	0		0	0	0	0	0	0	0	0	0	0	0	0	0	0	0	0	0	0		45.1718	127.045	364.416
							0	0	0	0	0	0	0	0	0	0	0	0	0	0	0	0	0	0	0	0		0	0	0	0	0	0	0	0	0	0	0	0	0	0	0	0	0	0		45.1718	127.045	364.416
							0	0	0	0	0	0	0	0	0	0	0	0	0	0	0	0	0	0	0	0		0	0	0	0	0	0	0	0	0	0	0	0	0	0	0	0	0	0		45.1718	127.045	364.416
							0	0	0	0	0	0	0	0	0	0	0	0	0	0	0	0	0	0	0	0		0	0	0	0	0	0	0	0	0	0	0	0	0	0	0	0	0	0		45.1718	127.045	364.416
							0	0	0	0	0	0	0	0	0	0	0	0	0	0	0	0	0	0	0	0		0	0	0	0	0	0	0	0	0	0	0	0	0	0	0	0	0	0		45.1718	127.045	364.416
							0	0	0	0	0	0	0	0	0	0	0	0	0	0	0	0	0	0	0	0		0	0	0	0	0	0	0	0	0	0	0	0	0	0	0	0	0	0		45.1718	127.045	364.416
							0	0	0	0	0	0	0	0	0	0	0	0	0	0	0	0	0	0	0	0		0	0	0	0	0	0	0	0	0	0	0	0	0	0	0	0	0	0		45.1718	127.045	364.416
							0	0	0	0	0	0	0	0	0	0	0	0	0	0	0	0	0	0	0	0		0	0	0	0	0	0	0	0	0	0	0	0	0	0	0	0	0	0		45.1718	127.045	364.416
							0	0	0	0	0	0	0	0	0	0	0	0	0	0	0	0	0	0	0	0		0	0	0	0	0	0	0	0	0	0	0	0	0	0	0	0	0	0		45.1718	127.045	364.416
							0	0	0	0	0	0	0	0	0	0	0	0	0	0	0	0	0	0	0	0		0	0	0	0	0	0	0	0	0	0	0	0	0	0	0	0	0	0		45.1718	127.045	364.416
							0	0	0	0	0	0	0	0	0	0	0	0	0	0	0	0	0	0	0	0		0	0	0	0	0	0	0	0	0	0	0	0	0	0	0	0	0	0		45.1718	127.045	364.416
							659	0	0	0	0	0	0	0	0	0	0	0	0	0	0	0	0	0	0	0		0	0	0	0	0	0	0	0	0	0	0	0	0	0	0	0	0	0		45.1718	127.045	364.416
							0	0	0	0	0	0	0	0	0	0	0	0	0	0	0	0	0	0	0	0		0	0	0	0	0	0	0	0	0	0	0	0	0	0	0	0	0	0		45.1718	127.045	364.416
							0	0	0	0	0	0	0	0	0	0	0	0	0	0	0	0	0	0	0	0		0	0	0	0	0	0	0	0	0	0	0	0	0	0	0	0	0	0		45.1718	127.045	364.416
							0	0	0	0	0	0	0	0	0	0	0	0	0	0	0	0	0	0	0	0		0	0	0	0	0	0	0	0	0	0	0	0	0	0	0	0	0	0		45.1718	127.045	364.416
							0	0	0	0	0	0	0	0	0	0	0	0	0	0	0	0	0	0	0	0		0	0	0	0	0	0	0	0	0	0	0	0	0	0	0	0	0	0		45.1718	127.045	364.416
							0	0	0	0	0	0	0	0	0	0	0	0	0	0	0	0	0	0	0	0		0	0	0	0	0	0	0	0	0	0	0	0	0	0	0	0	0	0		45.1718	127.045	364.416
							0	0	0	0	0	0	0	0	0	0	0	0	0	0	0	0	0	0	0	0		0	0	0	0	0	0	0	0	0	0	0	0	0	0	0	0	0	0		45.1718	127.045	364.416
							0	0	0	0	0	0	0	0	0	0	0	0	0	0	0	0	0	0	0	0		0	0	0	0	0	0	0	0	0	0	0	0	0	0	0	0	0	0		45.1718	127.045	364.416
							0	0	0	0	0	0	0	0	0	0	0	0	0	0	0	0	0	0	0	0		0	0	0	0	0	0	0	0	0	0	0	0	0	0	0	0	0	0		45.1718	127.045	364.416
							769	0	0	0	0	0	0	0	0	0	0	0	0	0	0	0	0	0	0	0		0	0	0	0	0	0	0	0	0	0	0	0	0	0	0	0	0	0		45.1718	127.045	364.416
							0	0	0	0	0	0	0	0	0	0	0	0	0	0	0	0	0	0	0	0		0	0	0	0	0	0	0	0	0	0	0	0	0	0	0	0	0	0		45.1718	127.045	364.416
							0	0	0	0	0	0	0	0	0	0	0	0	0	0	0	0	0	0	0	0		0	0	0	0	0	0	0	0	0	0	0	0	0	0	0	0	0	0		45.1718	127.045	364.416
							727	0	0	0	0	0	0	0	0	0	0	0	0	0	0	0	0	0	0	0		0	0	0	0	0	0	0	0	0	0	0	0	0	0	0	0	0	0		45.1718	127.045	364.416
							0	0	0	0	0	0	0	0	0	0	0	0	0	0	0	0	0	0	0	0		0	0	0	0	0	0	0	0	0	0	0	0	0	0	0	0	0	0		45.1718	127.045	364.416
							0	0	0	0	0	0	0	0	0	0	0	0	0	0	0	0	0	0	0	0		0	0	0	0	0	0	0	0	0	0	0	0	0	0	0	0	0	0		45.1718	127.045	364.416
							0	0	0	0	0	0	0	0	0	0	0	0	0	0	0	0	0	0	0	0		0	0	0	0	0	0	0	0	0	0	0	0	0	0	0	0	0	0		45.1718	127.045	364.416
							0	0	0	0	0	0	0	0	0	0	0	0	0	0	0	0	0	0	0	0		0	0	0	0	0	0	0	0	0	0	0	0	0	0	0	0	0	0		45.1718	127.045	364.416
							0	0	0	0	0	0	0	0	0	0	0	0	0	0	0	0	0	0	0	0		0	0	0	0	0	0	0	0	0	0	0	0	0	0	0	0	0	0		45.1718	127.045	364.416
							0	0	0	0	0	0	0	0	0	0	0	0	0	0	0	0	0	0	0	0		0	0	0	0	0	0	0	0	0	0	0	0	0	0	0	0	0	0		45.1718	127.045	364.416
							0	0	0	0	0	0	0	0	0	0	0	0	0	0	0	0	0	0	0	0		0	0	0	0	0	0	0	0	0	0	0	0	0	0	0	0	0	0		45.1718	127.045	364.416
							0	0	0	0	0	0	0	0	0	0	0	0	0	0	0	0	0	0	0	0		0	0	0	0	0	0	0	0	0	0	0	0	0	0	0	0	0	0		45.1718	127.045	364.416
							0	0	0	0	0	0	0	0	0	0	0	0	0	0	0	0	0	0	0	0		0	0	0	0	0	0	0	0	0	0	0	0	0	0	0	0	0	0		45.1718	127.045	364.416
							0	0	0	0	0	0	0	0	0	0	0	0	0	0	0	0	0	0	0	0		0	0	0	0	0	0	0	0	0	0	0	0	0	0	0	0	0	0		45.1718	127.045	364.416
							0	0	0	0	0	0	0	0	0	0	0	0	0	0	0	0	0	0	0	0		0	0	0	0	0	0	0	0	0	0	0	0	0	0	0	0	0	0		45.1718	127.045	364.416
							0	0	0	0	0	0	0	0	0	0	0	0	0	0	0	0	0	0	0	0		0	0	0	0	0	0	0	0	0	0	0	0	0	0	0	0	0	0		45.1718	127.045	364.416
							0	0	0	0	0	0	0	0	0	0	0	0	0	0	0	0	0	0	0	0		0	0	0	0	0	0	0	0	0	0	0	0	0	0	0	0	0	0		45.1718	127.045	364.416
							0	0	0	0	0	0	0	0	0	0	0	0	0	0	0	0	0	0	0	0		0	0	0	0	0	0	0	0	0	0	0	0	0	0	0	0	0	0		45.1718	127.045	364.416
							0	0	0	0	0	0	0	0	0	0	0	0	0	0	0	0	0	0	0	0		0	0	0	0	0	0	0	0	0	0	0	0	0	0	0	0	0	0		45.1718	127.045	364.416
							0	0	0	0	0	0	0	0	0	0	0	0	0	0	0	0	0	0	0	0		0	0	0	0	0	0	0	0	0	0	0	0	0	0	0	0	0	0		45.1718	127.045	364.416
							0	0	0	0	0	0	0	0	0	0	0	0	0	0	0	0	0	0	0	0		0	0	0	0	0	0	0	0	0	0	0	0	0	0	0	0	0	0		45.1718	127.045	364.416
							0	0	0	0	0	0	0	0	0	0	0	0	0	0	0	0	0	0	0	0		0	0	0	0	0	0	0	0	0	0	0	0	0	0	0	0	0	0		45.1718	127.045	364.416
							0	0	0	0	0	0	0	0	0	0	0	0	0	0	0	0	0	0	0	0		0	0	0	0	0	0	0	0	0	0	0	0	0	0	0	0	0	0		45.1718	127.045	364.416
							0	0	0	0	0	0	0	0	0	0	0	0	0	0	0	0	0	0	0	0		0	0	0	0	0	0	0	0	0	0	0	0	0	0	0	0	0	0		45.1718	127.045	364.416
							722	0	0	0	0	0	0	0	0	0	0	0	0	0	0	0	0	0	0	0		0	0	0	0	0	0	0	0	0	0	0	0	0	0	0	0	0	0		45.1718	127.045	364.416
							0	0	0	0	0	0	0	0	0	0	0	0	0	0	0	0	0	0	0	0		0	0	0	0	0	0	0	0	0	0	0	0	0	0	0	0	0	0		45.1718	127.045	364.416
							0	0	0	0	0	0	0	0	0	0	0	0	0	0	0	0	0	0	0	0		0	0	0	0	0	0	0	0	0	0	0	0	0	0	0	0	0	0		45.1718	127.045	364.416
							0	0	0	0	0	0	0	0	0	0	0	0	0	0	0	0	0	0	0	0		0	0	0	0	0	0	0	0	0	0	0	0	0	0	0	0	0	0		45.1718	127.045	364.416
							0	0	0	0	0	0	0	0	0	0	0	0	0	0	0	0	0	0	0	0		0	0	0	0	0	0	0	0	0	0	0	0	0	0	0	0	0	0		45.1718	127.045	364.416
							0	0	0	0	0	0	0	0	0	0	0	0	0	0	0	0	0	0	0	0		0	0	0	0	0	0	0	0	0	0	0	0	0	0	0	0	0	0		45.1718	127.045	364.416
							0	0	0	0	0	0	0	0	0	0	0	0	0	0	0	0	0	0	0	0		0	0	0	0	0	0	0	0	0	0	0	0	0	0	0	0	0	0		45.1718	127.045	364.416
							0	0	0	0	0	0	0	0	0	0	0	0	0	0	0	0	0	0	0	0		0	0	0	0	0	0	0	0	0	0	0	0	0	0	0	0	0	0		45.1718	127.045	364.416
							0	0	0	0	0	0	0	0	0	0	0	0	0	0	0	0	0	0	0	0		0	0	0	0	0	0	0	0	0	0	0	0	0	0	0	0	0	0		45.1718	127.045	364.416
							0	0	0	0	0	0	0	0	0	0	0	0	0	0	0	0	0	0	0	0		0	0	0	0	0	0	0	0	0	0	0	0	0	0	0	0	0	0		45.1718	127.045	364.416
							0	0	0	0	0	0	0	0	0	0	0	0	0	0	0	0	0	0	0	0		0	0	0	0	0	0	0	0	0	0	0	0	0	0	0	0	0	0		45.1718	127.045	364.416
							0	0	0	0	0	0	0	0	0	0	0	0	0	0	0	0	0	0	0	0		0	0	0	0	0	0	0	0	0	0	0	0	0	0	0	0	0	0		45.1718	127.045	364.416
							0	0	0	0	0	0	0	0	0	0	0	0	0	0	0	0	0	0	0	0		0	0	0	0	0	0	0	0	0	0	0	0	0	0	0	0	0	0		45.1718	127.045	364.416
							0	0	0	0	0	0	0	0	0	0	0	0	0	0	0	0	0	0	0	0		0	0	0	0	0	0	0	0	0	0	0	0	0	0	0	0	0	0		45.1718	127.045	364.416
							0	0	0	0	0	0	0	0	0	0	0	0	0	0	0	0	0	0	0	0		0	0	0	0	0	0	0	0	0	0	0	0	0	0	0	0	0	0		45.1718	127.045	364.416
							0	0	0	0	0	0	0	0	0	0	0	0	0	0	0	0	0	0	0	0		0	0	0	0	0	0	0	0	0	0	0	0	0	0	0	0	0	0		45.1718	127.045	364.416
							0	0	0	0	0	0	0	0	0	0	0	0	0	0	0	0	0	0	0	0		0	0	0	0	0	0	0	0	0	0	0	0	0	0	0	0	0	0		45.1718	127.045	364.416
							0	0	0	0	0	0	0	0	0	0	0	0	0	0	0	0	0	0	0	0		0	0	0	0	0	0	0	0	0	0	0	0	0	0	0	0	0	0		45.1718	127.045	364.416
							0	0	0	0	0	0	0	0	0	0	0	0	0	0	0	0	0	0	0	0		0	0	0	0	0	0	0	0	0	0	0	0	0	0	0	0	0	0		45.1718	127.045	364.416
							0	0	0	0	0	0	0	0	0	0	0	0	0	0	0	0	0	0	0	0		0	0	0	0	0	0	0	0	0	0	0	0	0	0	0	0	0	0		45.1718	127.045	364.416
							0	0	0	0	0	0	0	0	0	0	0	0	0	0	0	0	0	0	0	0		0	0	0	0	0	0	0	0	0	0	0	0	0	0	0	0	0	0		45.1718	127.045	364.416
							0	0	0	0	0	0	0	0	0	0	0	0	0	0	0	0	0	0	0	0		0	0	0	0	0	0	0	0	0	0	0	0	0	0	0	0	0	0		45.1718	127.045	364.416
							0	0	0	0	0	0	0	0	0	0	0	0	0	0	0	0	0	0	0	0		0	0	0	0	0	0	0	0	0	0	0	0	0	0	0	0	0	0		45.1718	127.045	364.416
							0	0	0	0	0	0	0	0	0	0	0	0	0	0	0	0	0	0	0	0		0	0	0	0	0	0	0	0	0	0	0	0	0	0	0	0	0	0		45.1718	127.045	364.416
							0	0	0	0	0	0	0	0	0	0	0	0	0	0	0	0	0	0	0	0		0	0	0	0	0	0	0	0	0	0	0	0	0	0	0	0	0	0		45.1718	127.045	364.416
							0	0	0	0	0	0	0	0	0	0	0	0	0	0	0	0	0	0	0	0		0	0	0	0	0	0	0	0	0	0	0	0	0	0	0	0	0	0		45.1718	127.045	364.416
							0	0	0	0	0	0	0	0	0	0	0	0	0	0	0	0	0	0	0	0		0	0	0	0	0	0	0	0	0	0	0	0	0	0	0	0	0	0		45.1718	127.045	364.416
							0	0	0	0	0	0	0	0	0	0	0	0	0	0	0	0	0	0	0	0		0	0	0	0	0	0	0	0	0	0	0	0	0	0	0	0	0	0		45.1718	127.045	364.416
							0	0	0	0	0	0	0	0	0	0	0	0	0	0	0	0	0	0	0	0		0	0	0	0	0	0	0	0	0	0	0	0	0	0	0	0	0	0		45.1718	127.045	364.416
							0	0	0	0	0	0	0	0	0	0	0	0	0	0	0	0	0	0	0	0		0	0	0	0	0	0	0	0	0	0	0	0	0	0	0	0	0	0		45.1718	127.045	364.416
							0	0	0	0	0	0	0	0	0	0	0	0	0	0	0	0	0	0	0	0		0	0	0	0	0	0	0	0	0	0	0	0	0	0	0	0	0	0		45.1718	127.045	364.416
							0	0	0	0	0	0	0	0	0	0	0	0	0	0	0	0	0	0	0	0		0	0	0	0	0	0	0	0	0	0	0	0	0	0	0	0	0	0		45.1718	127.045	364.416
							0	0	0	0	0	0	0	0	0	0	0	0	0	0	0	0	0	0	0	0		0	0	0	0	0	0	0	0	0	0	0	0	0	0	0	0	0	0		45.1718	127.045	364.416
							0	0	0	0	0	0	0	0	0	0	0	0	0	0	0	0	0	0	0	0		0	0	0	0	0	0	0	0	0	0	0	0	0	0	0	0	0	0		45.1718	127.045	364.416
							0	0	0	0	0	0	0	0	0	0	0	0	0	0	0	0	0	0	0	0		0	0	0	0	0	0	0	0	0	0	0	0	0	0	0	0	0	0		45.1718	127.045	364.416
							0	0	0	0	0	0	0	0	0	0	0	0	0	0	0	0	0	0	0	0		0	0	0	0	0	0	0	0	0	0	0	0	0	0	0	0	0	0		45.1718	127.045	364.416
							0	0	0	0	0	0	0	0	0	0	0	0	0	0	0	0	0	0	0	0		0	0	0	0	0	0	0	0	0	0	0	0	0	0	0	0	0	0		45.1718	127.045	364.416
							0	0	0	0	0	0	0	0	0	0	0	0	0	0	0	0	0	0	0	0		0	0	0	0	0	0	0	0	0	0	0	0	0	0	0	0	0	0		45.1718	127.045	364.416
							0	0	0	0	0	0	0	0	0	0	0	0	0	0	0	0	0	0	0	0		0	0	0	0	0	0	0	0	0	0	0	0	0	0	0	0	0	0		45.1718	127.045	364.416
							0	0	0	0	0	0	0	0	0	0	0	0	0	0	0	0	0	0	0	0		0	0	0	0	0	0	0	0	0	0	0	0	0	0	0	0	0	0		45.1718	127.045	364.416
							0	0	0	0	0	0	0	0	0	0	0	0	0	0	0	0	0	0	0	0		0	0	0	0	0	0	0	0	0	0	0	0	0	0	0	0	0	0		45.1718	127.045	364.416
							0	0	0	0	0	0	0	0	0	0	0	0	0	0	0	0	0	0	0	0		0	0	0	0	0	0	0	0	0	0	0	0	0	0	0	0	0	0		45.1718	127.045	364.416
							0	0	0	0	0	0	0	0	0	0	0	0	0	0	0	0	0	0	0	0		0	0	0	0	0	0	0	0	0	0	0	0	0	0	0	0	0	0		45.1718	127.045	364.416
							0	0	0	0	0	0	0	0	0	0	0	0	0	0	0	0	0	0	0	0		0	0	0	0	0	0	0	0	0	0	0	0	0	0	0	0	0	0		45.1718	127.045	364.416
							0	0	0	0	0	0	0	0	0	0	0	0	0	0	0	0	0	0	0	0		0	0	0	0	0	0	0	0	0	0	0	0	0	0	0	0	0	0		45.1718	127.045	364.416
							0	0	0	0	0	0	0	0	0	0	0	0	0	0	0	0	0	0	0	0		0	0	0	0	0	0	0	0	0	0	0	0	0	0	0	0	0	0		45.1718	127.045	364.416
							0	0	0	0	0	0	0	0	0	0	0	0	0	0	0	0	0	0	0	0		0	0	0	0	0	0	0	0	0	0	0	0	0	0	0	0	0	0		45.1718	127.045	364.416
							0	0	0	0	0	0	0	0	0	0	0	0	0	0	0	0	0	0	0	0		0	0	0	0	0	0	0	0	0	0	0	0	0	0	0	0	0	0		45.1718	127.045	364.416
							0	0	0	0	0	0	0	0	0	0	0	0	0	0	0	0	0	0	0	0		0	0	0	0	0	0	0	0	0	0	0	0	0	0	0	0	0	0		45.1718	127.045	364.416
							0	0	0	0	0	0	0	0	0	0	0	0	0	0	0	0	0	0	0	0		0	0	0	0	0	0	0	0	0	0	0	0	0	0	0	0	0	0		45.1718	127.045	364.416
							0	0	0	0	0	0	0	0	0	0	0	0	0	0	0	0	0	0	0	0		0	0	0	0	0	0	0	0	0	0	0	0	0	0	0	0	0	0		45.1718	127.045	364.416
							0	0	0	0	0	0	0	0	0	0	0	0	0	0	0	0	0	0	0	0		0	0	0	0	0	0	0	0	0	0	0	0	0	0	0	0	0	0		45.1718	127.045	364.416
							0	0	0	0	0	0	0	0	0	0	0	0	0	0	0	0	0	0	0	0		0	0	0	0	0	0	0	0	0	0	0	0	0	0	0	0	0	0		45.1718	127.045	364.416
							0	0	0	0	0	0	0	0	0	0	0	0	0	0	0	0	0	0	0	0		0	0	0	0	0	0	0	0	0	0	0	0	0	0	0	0	0	0		45.1718	127.045	364.416
							0	0	0	0	0	0	0	0	0	0	0	0	0	0	0	0	0	0	0	0		0	0	0	0	0	0	0	0	0	0	0	0	0	0	0	0	0	0		45.1718	127.045	364.416
							0	0	0	0	0	0	0	0	0	0	0	0	0	0	0	0	0	0	0	0		0	0	0	0	0	0	0	0	0	0	0	0	0	0	0	0	0	0		45.1718	127.045	364.416
							0	0	0	0	0	0	0	0	0	0	0	0	0	0	0	0	0	0	0	0		0	0	0	0	0	0	0	0	0	0	0	0	0	0	0	0	0	0		45.1718	127.045	364.416
							0	0	0	0	0	0	0	0	0	0	0	0	0	0	0	0	0	0	0	0		0	0	0	0	0	0	0	0	0	0	0	0	0	0	0	0	0	0		45.1718	127.045	364.416
							0	0	0	0	0	0	0	0	0	0	0	0	0	0	0	0	0	0	0	0		0	0	0	0	0	0	0	0	0	0	0	0	0	0	0	0	0	0		45.1718	127.045	364.416
							0	0	0	0	0	0	0	0	0	0	0	0	0	0	0	0	0	0	0	0		0	0	0	0	0	0	0	0	0	0	0	0	0	0	0	0	0	0		45.1718	127.045	364.416
							0	0	0	0	0	0	0	0	0	0	0	0	0	0	0	0	0	0	0	0		0	0	0	0	0	0	0	0	0	0	0	0	0	0	0	0	0	0		45.1718	127.045	364.416
							0	0	0	0	0	0	0	0	0	0	0	0	0	0	0	0	0	0	0	0		0	0	0	0	0	0	0	0	0	0	0	0	0	0	0	0	0	0		45.1718	127.045	364.416
							0	0	0	0	0	0	0	0	0	0	0	0	0	0	0	0	0	0	0	0		0	0	0	0	0	0	0	0	0	0	0	0	0	0	0	0	0	0		45.1718	127.045	364.416
							0	0	0	0	0	0	0	0	0	0	0	0	0	0	0	0	0	0	0	0		0	0	0	0	0	0	0	0	0	0	0	0	0	0	0	0	0	0		45.1718	127.045	364.416
							0	0	0	0	0	0	0	0	0	0	0	0	0	0	0	0	0	0	0	0		0	0	0	0	0	0	0	0	0	0	0	0	0	0	0	0	0	0		45.1718	127.045	364.416
							0	0	0	0	0	0	0	0	0	0	0	0	0	0	0	0	0	0	0	0		0	0	0	0	0	0	0	0	0	0	0	0	0	0	0	0	0	0		45.1718	127.045	364.416
							0	0	0	0	0	0	0	0	0	0	0	0	0	0	0	0	0	0	0	0		0	0	0	0	0	0	0	0	0	0	0	0	0	0	0	0	0	0		45.1718	127.045	364.416
							0	0	0	0	0	0	0	0	0	0	0	0	0	0	0	0	0	0	0	0		0	0	0	0	0	0	0	0	0	0	0	0	0	0	0	0	0	0		45.1718	127.045	364.416
							0	0	0	0	0	0	0	0	0	0	0	0	0	0	0	0	0	0	0	0		0	0	0	0	0	0	0	0	0	0	0	0	0	0	0	0	0	0		45.1718	127.045	364.416
							0	0	0	0	0	0	0	0	0	0	0	0	0	0	0	0	0	0	0	0		0	0	0	0	0	0	0	0	0	0	0	0	0	0	0	0	0	0		45.1718	127.045	364.416
							0	0	0	0	0	0	0	0	0	0	0	0	0	0	0	0	0	0	0	0		0	0	0	0	0	0	0	0	0	0	0	0	0	0	0	0	0	0		45.1718	127.045	364.416
							0	0	0	0	0	0	0	0	0	0	0	0	0	0	0	0	0	0	0	0		0	0	0	0	0	0	0	0	0	0	0	0	0	0	0	0	0	0		45.1718	127.045	364.416
							0	0	0	0	0	0	0	0	0	0	0	0	0	0	0	0	0	0	0	0		0	0	0	0	0	0	0	0	0	0	0	0	0	0	0	0	0	0		45.1718	127.045	364.416
							0	0	0	0	0	0	0	0	0	0	0	0	0	0	0	0	0	0	0	0		0	0	0	0	0	0	0	0	0	0	0	0	0	0	0	0	0	0		45.1718	127.045	364.416
							0	0	0	0	0	0	0	0	0	0	0	0	0	0	0	0	0	0	0	0		0	0	0	0	0	0	0	0	0	0	0	0	0	0	0	0	0	0		45.1718	127.045	364.416
							0	0	0	0	0	0	0	0	0	0	0	0	0	0	0	0	0	0	0	0		0	0	0	0	0	0	0	0	0	0	0	0	0	0	0	0	0	0		45.1718	127.045	364.416
							0	0	0	0	0	0	0	0	0	0	0	0	0	0	0	0	0	0	0	0		0	0	0	0	0	0	0	0	0	0	0	0	0	0	0	0	0	0		45.1718	127.045	364.416
							0	0	0	0	0	0	0	0	0	0	0	0	0	0	0	0	0	0	0	0		0	0	0	0	0	0	0	0	0	0	0	0	0	0	0	0	0	0		45.1718	127.045	364.416
							0	0	0	0	0	0	0	0	0	0	0	0	0	0	0	0	0	0	0	0		0	0	0	0	0	0	0	0	0	0	0	0	0	0	0	0	0	0		45.1718	127.045	364.416
							0	0	0	0	0	0	0	0	0	0	0	0	0	0	0	0	0	0	0	0		0	0	0	0	0	0	0	0	0	0	0	0	0	0	0	0	0	0		45.1718	127.045	364.416
							0	0	0	0	0	0	0	0	0	0	0	0	0	0	0	0	0	0	0	0		0	0	0	0	0	0	0	0	0	0	0	0	0	0	0	0	0	0		45.1718	127.045	364.416
							0	0	0	0	0	0	0	0	0	0	0	0	0	0	0	0	0	0	0	0		0	0	0	0	0	0	0	0	0	0	0	0	0	0	0	0	0	0		45.1718	127.045	364.416
							0	0	0	0	0	0	0	0	0	0	0	0	0	0	0	0	0	0	0	0		0	0	0	0	0	0	0	0	0	0	0	0	0	0	0	0	0	0		45.1718	127.045	364.416
							0	0	0	0	0	0	0	0	0	0	0	0	0	0	0	0	0	0	0	0		0	0	0	0	0	0	0	0	0	0	0	0	0	0	0	0	0	0		45.1718	127.045	364.416
							0	0	0	0	0	0	0	0	0	0	0	0	0	0	0	0	0	0	0	0		0	0	0	0	0	0	0	0	0	0	0	0	0	0	0	0	0	0		45.1718	127.045	364.416
							0	0	0	0	0	0	0	0	0	0	0	0	0	0	0	0	0	0	0	0		0	0	0	0	0	0	0	0	0	0	0	0	0	0	0	0	0	0		45.1718	127.045	364.416
							0	0	0	0	0	0	0	0	0	0	0	0	0	0	0	0	0	0	0	0		0	0	0	0	0	0	0	0	0	0	0	0	0	0	0	0	0	0		45.1718	127.045	364.416
							0	0	0	0	0	0	0	0	0	0	0	0	0	0	0	0	0	0	0	0		0	0	0	0	0	0	0	0	0	0	0	0	0	0	0	0	0	0		45.1718	127.045	364.416
							0	0	0	0	0	0	0	0	0	0	0	0	0	0	0	0	0	0	0	0		0	0	0	0	0	0	0	0	0	0	0	0	0	0	0	0	0	0		45.1718	127.045	364.416
							0	0	0	0	0	0	0	0	0	0	0	0	0	0	0	0	0	0	0	0		0	0	0	0	0	0	0	0	0	0	0	0	0	0	0	0	0	0		45.1718	127.045	364.416
							0	0	0	0	0	0	0	0	0	0	0	0	0	0	0	0	0	0	0	0		0	0	0	0	0	0	0	0	0	0	0	0	0	0	0	0	0	0		45.1718	127.045	364.416
							0	0	0	0	0	0	0	0	0	0	0	0	0	0	0	0	0	0	0	0		0	0	0	0	0	0	0	0	0	0	0	0	0	0	0	0	0	0		45.1718	127.045	364.416
							0	0	0	0	0	0	0	0	0	0	0	0	0	0	0	0	0	0	0	0		0	0	0	0	0	0	0	0	0	0	0	0	0	0	0	0	0	0		45.1718	127.045	364.416
							0	0	0	0	0	0	0	0	0	0	0	0	0	0	0	0	0	0	0	0		0	0	0	0	0	0	0	0	0	0	0	0	0	0	0	0	0	0		45.1718	127.045	364.416
							0	0	0	0	0	0	0	0	0	0	0	0	0	0	0	0	0	0	0	0		0	0	0	0	0	0	0	0	0	0	0	0	0	0	0	0	0	0		45.1718	127.045	364.416
							0	0	0	0	0	0	0	0	0	0	0	0	0	0	0	0	0	0	0	0		0	0	0	0	0	0	0	0	0	0	0	0	0	0	0	0	0	0		45.1718	127.045	364.416
							0	0	0	0	0	0	0	0	0	0	0	0	0	0	0	0	0	0	0	0		0	0	0	0	0	0	0	0	0	0	0	0	0	0	0	0	0	0		45.1718	127.045	364.416
							0	0	0	0	0	0	0	0	0	0	0	0	0	0	0	0	0	0	0	0		0	0	0	0	0	0	0	0	0	0	0	0	0	0	0	0	0	0		45.1718	127.045	364.416
							0	0	0	0	0	0	0	0	0	0	0	0	0	0	0	0	0	0	0	0		0	0	0	0	0	0	0	0	0	0	0	0	0	0	0	0	0	0		45.1718	127.045	364.416
							0	0	0	0	0	0	0	0	0	0	0	0	0	0	0	0	0	0	0	0		0	0	0	0	0	0	0	0	0	0	0	0	0	0	0	0	0	0		45.1718	127.045	364.416
							0	0	0	0	0	0	0	0	0	0	0	0	0	0	0	0	0	0	0	0		0	0	0	0	0	0	0	0	0	0	0	0	0	0	0	0	0	0		45.1718	127.045	364.416
							0	0	0	0	0	0	0	0	0	0	0	0	0	0	0	0	0	0	0	0		0	0	0	0	0	0	0	0	0	0	0	0	0	0	0	0	0	0		45.1718	127.045	364.416
							0	0	0	0	0	0	0	0	0	0	0	0	0	0	0	0	0	0	0	0		0	0	0	0	0	0	0	0	0	0	0	0	0	0	0	0	0	0		45.1718	127.045	364.416
							0	0	0	0	0	0	0	0	0	0	0	0	0	0	0	0	0	0	0	0		0	0	0	0	0	0	0	0	0	0	0	0	0	0	0	0	0	0		45.1718	127.045	364.416
							0	0	0	0	0	0	0	0	0	0	0	0	0	0	0	0	0	0	0	0		0	0	0	0	0	0	0	0	0	0	0	0	0	0	0	0	0	0		45.1718	127.045	364.416
							0	0	0	0	0	0	0	0	0	0	0	0	0	0	0	0	0	0	0	0		0	0	0	0	0	0	0	0	0	0	0	0	0	0	0	0	0	0		45.1718	127.045	364.416
							0	0	0	0	0	0	0	0	0	0	0	0	0	0	0	0	0	0	0	0		0	0	0	0	0	0	0	0	0	0	0	0	0	0	0	0	0	0		45.1718	127.045	364.416
							0	0	0	0	0	0	0	0	0	0	0	0	0	0	0	0	0	0	0	0		0	0	0	0	0	0	0	0	0	0	0	0	0	0	0	0	0	0		45.1718	127.045	364.416
							0	0	0	0	0	0	0	0	0	0	0	0	0	0	0	0	0	0	0	0		0	0	0	0	0	0	0	0	0	0	0	0	0	0	0	0	0	0		45.1718	127.045	364.416
							0	0	0	0	0	0	0	0	0	0	0	0	0	0	0	0	0	0	0	0		0	0	0	0	0	0	0	0	0	0	0	0	0	0	0	0	0	0		45.1718	127.045	364.416
							0	0	0	0	0	0	0	0	0	0	0	0	0	0	0	0	0	0	0	0		0	0	0	0	0	0	0	0	0	0	0	0	0	0	0	0	0	0		45.1718	127.045	364.416
							0	0	0	0	0	0	0	0	0	0	0	0	0	0	0	0	0	0	0	0		0	0	0	0	0	0	0	0	0	0	0	0	0	0	0	0	0	0		45.1718	127.045	364.416
							0	0	0	0	0	0	0	0	0	0	0	0	0	0	0	0	0	0	0	0		0	0	0	0	0	0	0	0	0	0	0	0	0	0	0	0	0	0		45.1718	127.045	364.416
							0	0	0	0	0	0	0	0	0	0	0	0	0	0	0	0	0	0	0	0		0	0	0	0	0	0	0	0	0	0	0	0	0	0	0	0	0	0		45.1718	127.045	364.416
							0	0	0	0	0	0	0	0	0	0	0	0	0	0	0	0	0	0	0	0		0	0	0	0	0	0	0	0	0	0	0	0	0	0	0	0	0	0		45.1718	127.045	364.416
							0	0	0	0	0	0	0	0	0	0	0	0	0	0	0	0	0	0	0	0		0	0	0	0	0	0	0	0	0	0	0	0	0	0	0	0	0	0		45.1718	127.045	364.416
							0	0	0	0	0	0	0	0	0	0	0	0	0	0	0	0	0	0	0	0		0	0	0	0	0	0	0	0	0	0	0	0	0	0	0	0	0	0		45.1718	127.045	364.416
							0	0	0	0	0	0	0	0	0	0	0	0	0	0	0	0	0	0	0	0		0	0	0	0	0	0	0	0	0	0	0	0	0	0	0	0	0	0		45.1718	127.045	364.416
							0	0	0	0	0	0	0	0	0	0	0	0	0	0	0	0	0	0	0	0		0	0	0	0	0	0	0	0	0	0	0	0	0	0	0	0	0	0		45.1718	127.045	364.416
							0	0	0	0	0	0	0	0	0	0	0	0	0	0	0	0	0	0	0	0		0	0	0	0	0	0	0	0	0	0	0	0	0	0	0	0	0	0		45.1718	127.045	364.416
							0	0	0	0	0	0	0	0	0	0	0	0	0	0	0	0	0	0	0	0		0	0	0	0	0	0	0	0	0	0	0	0	0	0	0	0	0	0		45.1718	127.045	364.416
							0	0	0	0	0	0	0	0	0	0	0	0	0	0	0	0	0	0	0	0		0	0	0	0	0	0	0	0	0	0	0	0	0	0	0	0	0	0		45.1718	127.045	364.416
							0	0	0	0	0	0	0	0	0	0	0	0	0	0	0	0	0	0	0	0		0	0	0	0	0	0	0	0	0	0	0	0	0	0	0	0	0	0		45.1718	127.045	364.416
							0	0	0	0	0	0	0	0	0	0	0	0	0	0	0	0	0	0	0	0		0	0	0	0	0	0	0	0	0	0	0	0	0	0	0	0	0	0		45.1718	127.045	364.416
							0	0	0	0	0	0	0	0	0	0	0	0	0	0	0	0	0	0	0	0		0	0	0	0	0	0	0	0	0	0	0	0	0	0	0	0	0	0		45.1718	127.045	364.416
							0	0	0	0	0	0	0	0	0	0	0	0	0	0	0	0	0	0	0	0		0	0	0	0	0	0	0	0	0	0	0	0	0	0	0	0	0	0		45.1718	127.045	364.416
							0	0	0	0	0	0	0	0	0	0	0	0	0	0	0	0	0	0	0	0		0	0	0	0	0	0	0	0	0	0	0	0	0	0	0	0	0	0		45.1718	127.045	364.416
							0	0	0	0	0	0	0	0	0	0	0	0	0	0	0	0	0	0	0	0		0	0	0	0	0	0	0	0	0	0	0	0	0	0	0	0	0	0		45.1718	127.045	364.416
							0	0	0	0	0	0	0	0	0	0	0	0	0	0	0	0	0	0	0	0		0	0	0	0	0	0	0	0	0	0	0	0	0	0	0	0	0	0		45.1718	127.045	364.416
							0	0	0	0	0	0	0	0	0	0	0	0	0	0	0	0	0	0	0	0		0	0	0	0	0	0	0	0	0	0	0	0	0	0	0	0	0	0		45.1718	127.045	364.416
							0	0	0	0	0	0	0	0	0	0	0	0	0	0	0	0	0	0	0	0		0	0	0	0	0	0	0	0	0	0	0	0	0	0	0	0	0	0		45.1718	127.045	364.416
							0	0	0	0	0	0	0	0	0	0	0	0	0	0	0	0	0	0	0	0		0	0	0	0	0	0	0	0	0	0	0	0	0	0	0	0	0	0		45.1718	127.045	364.416
							0	0	0	0	0	0	0	0	0	0	0	0	0	0	0	0	0	0	0	0		0	0	0	0	0	0	0	0	0	0	0	0	0	0	0	0	0	0		45.1718	127.045	364.416
							0	0	0	0	0	0	0	0	0	0	0	0	0	0	0	0	0	0	0	0		0	0	0	0	0	0	0	0	0	0	0	0	0	0	0	0	0	0		45.1718	127.045	364.416
							0	0	0	0	0	0	0	0	0	0	0	0	0	0	0	0	0	0	0	0		0	0	0	0	0	0	0	0	0	0	0	0	0	0	0	0	0	0		45.1718	127.045	364.416
							0	0	0	0	0	0	0	0	0	0	0	0	0	0	0	0	0	0	0	0		0	0	0	0	0	0	0	0	0	0	0	0	0	0	0	0	0	0		45.1718	127.045	364.416
							0	0	0	0	0	0	0	0	0	0	0	0	0	0	0	0	0	0	0	0		0	0	0	0	0	0	0	0	0	0	0	0	0	0	0	0	0	0		45.1718	127.045	364.416
							0	0	0	0	0	0	0	0	0	0	0	0	0	0	0	0	0	0	0	0		0	0	0	0	0	0	0	0	0	0	0	0	0	0	0	0	0	0		45.1718	127.045	364.416
							0	0	0	0	0	0	0	0	0	0	0	0	0	0	0	0	0	0	0	0		0	0	0	0	0	0	0	0	0	0	0	0	0	0	0	0	0	0		45.1718	127.045	364.416
							0	0	0	0	0	0	0	0	0	0	0	0	0	0	0	0	0	0	0	0		0	0	0	0	0	0	0	0	0	0	0	0	0	0	0	0	0	0		45.1718	127.045	364.416
							0	0	0	0	0	0	0	0	0	0	0	0	0	0	0	0	0	0	0	0		0	0	0	0	0	0	0	0	0	0	0	0	0	0	0	0	0	0		45.1718	127.045	364.416
							0	0	0	0	0	0	0	0	0	0	0	0	0	0	0	0	0	0	0	0		0	0	0	0	0	0	0	0	0	0	0	0	0	0	0	0	0	0		45.1718	127.045	364.416
							0	0	0	0	0	0	0	0	0	0	0	0	0	0	0	0	0	0	0	0		0	0	0	0	0	0	0	0	0	0	0	0	0	0	0	0	0	0		45.1718	127.045	364.416
							0	0	0	0	0	0	0	0	0	0	0	0	0	0	0	0	0	0	0	0		0	0	0	0	0	0	0	0	0	0	0	0	0	0	0	0	0	0		45.1718	127.045	364.416
							0	0	0	0	0	0	0	0	0	0	0	0	0	0	0	0	0	0	0	0		0	0	0	0	0	0	0	0	0	0	0	0	0	0	0	0	0	0		45.1718	127.045	364.416
							0	0	0	0	0	0	0	0	0	0	0	0	0	0	0	0	0	0	0	0		0	0	0	0	0	0	0	0	0	0	0	0	0	0	0	0	0	0		45.1718	127.045	364.416
							0	0	0	0	0	0	0	0	0	0	0	0	0	0	0	0	0	0	0	0		0	0	0	0	0	0	0	0	0	0	0	0	0	0	0	0	0	0		45.1718	127.045	364.416
							0	0	0	0	0	0	0	0	0	0	0	0	0	0	0	0	0	0	0	0		0	0	0	0	0	0	0	0	0	0	0	0	0	0	0	0	0	0		45.1718	127.045	364.416
							0	0	0	0	0	0	0	0	0	0	0	0	0	0	0	0	0	0	0	0		0	0	0	0	0	0	0	0	0	0	0	0	0	0	0	0	0	0		45.1718	127.045	364.416
							0	0	0	0	0	0	0	0	0	0	0	0	0	0	0	0	0	0	0	0		0	0	0	0	0	0	0	0	0	0	0	0	0	0	0	0	0	0		45.1718	127.045	364.416
							0	0	0	0	0	0	0	0	0	0	0	0	0	0	0	0	0	0	0	0		0	0	0	0	0	0	0	0	0	0	0	0	0	0	0	0	0	0		45.1718	127.045	364.416
							0	0	0	0	0	0	0	0	0	0	0	0	0	0	0	0	0	0	0	0		0	0	0	0	0	0	0	0	0	0	0	0	0	0	0	0	0	0		45.1718	127.045	364.416
							0	0	0	0	0	0	0	0	0	0	0	0	0	0	0	0	0	0	0	0		0	0	0	0	0	0	0	0	0	0	0	0	0	0	0	0	0	0		45.1718	127.045	364.416
							0	0	0	0	0	0	0	0	0	0	0	0	0	0	0	0	0	0	0	0		0	0	0	0	0	0	0	0	0	0	0	0	0	0	0	0	0	0		45.1718	127.045	364.416
							0	0	0	0	0	0	0	0	0	0	0	0	0	0	0	0	0	0	0	0		0	0	0	0	0	0	0	0	0	0	0	0	0	0	0	0	0	0		45.1718	127.045	364.416
							0	0	0	0	0	0	0	0	0	0	0	0	0	0	0	0	0	0	0	0		0	0	0	0	0	0	0	0	0	0	0	0	0	0	0	0	0	0		45.1718	127.045	364.416
							0	0	0	0	0	0	0	0	0	0	0	0	0	0	0	0	0	0	0	0		0	0	0	0	0	0	0	0	0	0	0	0	0	0	0	0	0	0		45.1718	127.045	364.416
							0	0	0	0	0	0	0	0	0	0	0	0	0	0	0	0	0	0	0	0		0	0	0	0	0	0	0	0	0	0	0	0	0	0	0	0	0	0		45.1718	127.045	364.416
							0	0	0	0	0	0	0	0	0	0	0	0	0	0	0	0	0	0	0	0		0	0	0	0	0	0	0	0	0	0	0	0	0	0	0	0	0	0		45.1718	127.045	364.416
							0	0	0	0	0	0	0	0	0	0	0	0	0	0	0	0	0	0	0	0		0	0	0	0	0	0	0	0	0	0	0	0	0	0	0	0	0	0		45.1718	127.045	364.416
							0	0	0	0	0	0	0	0	0	0	0	0	0	0	0	0	0	0	0	0		0	0	0	0	0	0	0	0	0	0	0	0	0	0	0	0	0	0		45.1718	127.045	364.416
							0	0	0	0	0	0	0	0	0	0	0	0	0	0	0	0	0	0	0	0		0	0	0	0	0	0	0	0	0	0	0	0	0	0	0	0	0	0		45.1718	127.045	364.416
							0	0	0	0	0	0	0	0	0	0	0	0	0	0	0	0	0	0	0	0		0	0	0	0	0	0	0	0	0	0	0	0	0	0	0	0	0	0		45.1718	127.045	364.416
							0	0	0	0	0	0	0	0	0	0	0	0	0	0	0	0	0	0	0	0		0	0	0	0	0	0	0	0	0	0	0	0	0	0	0	0	0	0		45.1718	127.045	364.416
							0	0	0	0	0	0	0	0	0	0	0	0	0	0	0	0	0	0	0	0		0	0	0	0	0	0	0	0	0	0	0	0	0	0	0	0	0	0		45.1718	127.045	364.416
							0	0	0	0	0	0	0	0	0	0	0	0	0	0	0	0	0	0	0	0		0	0	0	0	0	0	0	0	0	0	0	0	0	0	0	0	0	0		45.1718	127.045	364.416
							0	0	0	0	0	0	0	0	0	0	0	0	0	0	0	0	0	0	0	0		0	0	0	0	0	0	0	0	0	0	0	0	0	0	0	0	0	0		45.1718	127.045	364.416
							0	0	0	0	0	0	0	0	0	0	0	0	0	0	0	0	0	0	0	0		0	0	0	0	0	0	0	0	0	0	0	0	0	0	0	0	0	0		45.1718	127.045	364.416
							0	0	0	0	0	0	0	0	0	0	0	0	0	0	0	0	0	0	0	0		0	0	0	0	0	0	0	0	0	0	0	0	0	0	0	0	0	0		45.1718	127.045	364.416
							0	0	0	0	0	0	0	0	0	0	0	0	0	0	0	0	0	0	0	0		0	0	0	0	0	0	0	0	0	0	0	0	0	0	0	0	0	0		45.1718	127.045	364.416
							0	0	0	0	0	0	0	0	0	0	0	0	0	0	0	0	0	0	0	0		0	0	0	0	0	0	0	0	0	0	0	0	0	0	0	0	0	0		45.1718	127.045	364.416
							0	0	0	0	0	0	0	0	0	0	0	0	0	0	0	0	0	0	0	0		0	0	0	0	0	0	0	0	0	0	0	0	0	0	0	0	0	0		45.1718	127.045	364.416
							0	0	0	0	0	0	0	0	0	0	0	0	0	0	0	0	0	0	0	0		0	0	0	0	0	0	0	0	0	0	0	0	0	0	0	0	0	0		45.1718	127.045	364.416
							0	0	0	0	0	0	0	0	0	0	0	0	0	0	0	0	0	0	0	0		0	0	0	0	0	0	0	0	0	0	0	0	0	0	0	0	0	0		45.1718	127.045	364.416
							0	0	0	0	0	0	0	0	0	0	0	0	0	0	0	0	0	0	0	0		0	0	0	0	0	0	0	0	0	0	0	0	0	0	0	0	0	0		45.1718	127.045	364.416
							0	0	0	0	0	0	0	0	0	0	0	0	0	0	0	0	0	0	0	0		0	0	0	0	0	0	0	0	0	0	0	0	0	0	0	0	0	0		45.1718	127.045	364.416
							0	0	0	0	0	0	0	0	0	0	0	0	0	0	0	0	0	0	0	0		0	0	0	0	0	0	0	0	0	0	0	0	0	0	0	0	0	0		45.1718	127.045	364.416
							0	0	0	0	0	0	0	0	0	0	0	0	0	0	0	0	0	0	0	0		0	0	0	0	0	0	0	0	0	0	0	0	0	0	0	0	0	0		45.1718	127.045	364.416
							0	0	0	0	0	0	0	0	0	0	0	0	0	0	0	0	0	0	0	0		0	0	0	0	0	0	0	0	0	0	0	0	0	0	0	0	0	0		45.1718	127.045	364.416
							0	0	0	0	0	0	0	0	0	0	0	0	0	0	0	0	0	0	0	0		0	0	0	0	0	0	0	0	0	0	0	0	0	0	0	0	0	0		45.1718	127.045	364.416
							0	0	0	0	0	0	0	0	0	0	0	0	0	0	0	0	0	0	0	0		0	0	0	0	0	0	0	0	0	0	0	0	0	0	0	0	0	0		45.1718	127.045	364.416
							0	0	0	0	0	0	0	0	0	0	0	0	0	0	0	0	0	0	0	0		0	0	0	0	0	0	0	0	0	0	0	0	0	0	0	0	0	0		45.1718	127.045	364.416
							0	0	0	0	0	0	0	0	0	0	0	0	0	0	0	0	0	0	0	0		0	0	0	0	0	0	0	0	0	0	0	0	0	0	0	0	0	0		45.1718	127.045	364.416
							0	0	0	0	0	0	0	0	0	0	0	0	0	0	0	0	0	0	0	0		0	0	0	0	0	0	0	0	0	0	0	0	0	0	0	0	0	0		45.1718	127.045	364.416
							0	0	0	0	0	0	0	0	0	0	0	0	0	0	0	0	0	0	0	0		0	0	0	0	0	0	0	0	0	0	0	0	0	0	0	0	0	0		45.1718	127.045	364.416
							0	0	0	0	0	0	0	0	0	0	0	0	0	0	0	0	0	0	0	0		0	0	0	0	0	0	0	0	0	0	0	0	0	0	0	0	0	0		45.1718	127.045	364.416
							0	0	0	0	0	0	0	0	0	0	0	0	0	0	0	0	0	0	0	0		0	0	0	0	0	0	0	0	0	0	0	0	0	0	0	0	0	0		45.1718	127.045	364.416
							0	0	0	0	0	0	0	0	0	0	0	0	0	0	0	0	0	0	0	0		0	0	0	0	0	0	0	0	0	0	0	0	0	0	0	0	0	0		45.1718	127.045	364.416
							0	0	0	0	0	0	0	0	0	0	0	0	0	0	0	0	0	0	0	0		0	0	0	0	0	0	0	0	0	0	0	0	0	0	0	0	0	0		45.1718	127.045	364.416
							0	0	0	0	0	0	0	0	0	0	0	0	0	0	0	0	0	0	0	0		0	0	0	0	0	0	0	0	0	0	0	0	0	0	0	0	0	0		45.1718	127.045	364.416
							0	0	0	0	0	0	0	0	0	0	0	0	0	0	0	0	0	0	0	0		0	0	0	0	0	0	0	0	0	0	0	0	0	0	0	0	0	0		45.1718	127.045	364.416
							0	0	0	0	0	0	0	0	0	0	0	0	0	0	0	0	0	0	0	0		0	0	0	0	0	0	0	0	0	0	0	0	0	0	0	0	0	0		45.1718	127.045	364.416
							0	0	0	0	0	0	0	0	0	0	0	0	0	0	0	0	0	0	0	0		0	0	0	0	0	0	0	0	0	0	0	0	0	0	0	0	0	0		45.1718	127.045	364.416
							0	0	0	0	0	0	0	0	0	0	0	0	0	0	0	0	0	0	0	0		0	0	0	0	0	0	0	0	0	0	0	0	0	0	0	0	0	0		45.1718	127.045	364.416
							0	0	0	0	0	0	0	0	0	0	0	0	0	0	0	0	0	0	0	0		0	0	0	0	0	0	0	0	0	0	0	0	0	0	0	0	0	0		45.1718	127.045	364.416
							0	0	0	0	0	0	0	0	0	0	0	0	0	0	0	0	0	0	0	0		0	0	0	0	0	0	0	0	0	0	0	0	0	0	0	0	0	0		45.1718	127.045	364.416
							0	0	0	0	0	0	0	0	0	0	0	0	0	0	0	0	0	0	0	0		0	0	0	0	0	0	0	0	0	0	0	0	0	0	0	0	0	0		45.1718	127.045	364.416
							0	0	0	0	0	0	0	0	0	0	0	0	0	0	0	0	0	0	0	0		0	0	0	0	0	0	0	0	0	0	0	0	0	0	0	0	0	0		45.1718	127.045	364.416
							0	0	0	0	0	0	0	0	0	0	0	0	0	0	0	0	0	0	0	0		0	0	0	0	0	0	0	0	0	0	0	0	0	0	0	0	0	0		45.1718	127.045	364.416
							0	0	0	0	0	0	0	0	0	0	0	0	0	0	0	0	0	0	0	0		0	0	0	0	0	0	0	0	0	0	0	0	0	0	0	0	0	0		45.1718	127.045	364.416
							0	0	0	0	0	0	0	0	0	0	0	0	0	0	0	0	0	0	0	0		0	0	0	0	0	0	0	0	0	0	0	0	0	0	0	0	0	0		45.1718	127.045	364.416
							0	0	0	0	0	0	0	0	0	0	0	0	0	0	0	0	0	0	0	0		0	0	0	0	0	0	0	0	0	0	0	0	0	0	0	0	0	0		45.1718	127.045	364.416
							0	0	0	0	0	0	0	0	0	0	0	0	0	0	0	0	0	0	0	0		0	0	0	0	0	0	0	0	0	0	0	0	0	0	0	0	0	0		45.1718	127.045	364.416
							0	0	0	0	0	0	0	0	0	0	0	0	0	0	0	0	0	0	0	0		0	0	0	0	0	0	0	0	0	0	0	0	0	0	0	0	0	0		45.1718	127.045	364.416
							0	0	0	0	0	0	0	0	0	0	0	0	0	0	0	0	0	0	0	0		0	0	0	0	0	0	0	0	0	0	0	0	0	0	0	0	0	0		45.1718	127.045	364.416
							0	0	0	0	0	0	0	0	0	0	0	0	0	0	0	0	0	0	0	0		0	0	0	0	0	0	0	0	0	0	0	0	0	0	0	0	0	0		45.1718	127.045	364.416
							0	0	0	0	0	0	0	0	0	0	0	0	0	0	0	0	0	0	0	0		0	0	0	0	0	0	0	0	0	0	0	0	0	0	0	0	0	0		45.1718	127.045	364.416
							0	0	0	0	0	0	0	0	0	0	0	0	0	0	0	0	0	0	0	0		0	0	0	0	0	0	0	0	0	0	0	0	0	0	0	0	0	0		45.1718	127.045	364.416
							0	0	0	0	0	0	0	0	0	0	0	0	0	0	0	0	0	0	0	0		0	0	0	0	0	0	0	0	0	0	0	0	0	0	0	0	0	0		45.1718	127.045	364.416
							0	0	0	0	0	0	0	0	0	0	0	0	0	0	0	0	0	0	0	0		0	0	0	0	0	0	0	0	0	0	0	0	0	0	0	0	0	0		45.1718	127.045	364.416
							0	0	0	0	0	0	0	0	0	0	0	0	0	0	0	0	0	0	0	0		0	0	0	0	0	0	0	0	0	0	0	0	0	0	0	0	0	0		45.1718	127.045	364.416
							0	0	0	0	0	0	0	0	0	0	0	0	0	0	0	0	0	0	0	0		0	0	0	0	0	0	0	0	0	0	0	0	0	0	0	0	0	0		45.1718	127.045	364.416
							0	0	0	0	0	0	0	0	0	0	0	0	0	0	0	0	0	0	0	0		0	0	0	0	0	0	0	0	0	0	0	0	0	0	0	0	0	0		45.1718	127.045	364.416
							0	0	0	0	0	0	0	0	0	0	0	0	0	0	0	0	0	0	0	0		0	0	0	0	0	0	0	0	0	0	0	0	0	0	0	0	0	0		45.1718	127.045	364.416
							0	0	0	0	0	0	0	0	0	0	0	0	0	0	0	0	0	0	0	0		0	0	0	0	0	0	0	0	0	0	0	0	0	0	0	0	0	0		45.1718	127.045	364.416
							0	0	0	0	0	0	0	0	0	0	0	0	0	0	0	0	0	0	0	0		0	0	0	0	0	0	0	0	0	0	0	0	0	0	0	0	0	0		45.1718	127.045	364.416
							0	0	0	0	0	0	0	0	0	0	0	0	0	0	0	0	0	0	0	0		0	0	0	0	0	0	0	0	0	0	0	0	0	0	0	0	0	0		45.1718	127.045	364.416
							0	0	0	0	0	0	0	0	0	0	0	0	0	0	0	0	0	0	0	0		0	0	0	0	0	0	0	0	0	0	0	0	0	0	0	0	0	0		45.1718	127.045	364.416
							0	0	0	0	0	0	0	0	0	0	0	0	0	0	0	0	0	0	0	0		0	0	0	0	0	0	0	0	0	0	0	0	0	0	0	0	0	0		45.1718	127.045	364.416
							0	0	0	0	0	0	0	0	0	0	0	0	0	0	0	0	0	0	0	0		0	0	0	0	0	0	0	0	0	0	0	0	0	0	0	0	0	0		45.1718	127.045	364.416
							0	0	0	0	0	0	0	0	0	0	0	0	0	0	0	0	0	0	0	0		0	0	0	0	0	0	0	0	0	0	0	0	0	0	0	0	0	0		45.1718	127.045	364.416
							0	0	0	0	0	0	0	0	0	0	0	0	0	0	0	0	0	0	0	0		0	0	0	0	0	0	0	0	0	0	0	0	0	0	0	0	0	0		45.1718	127.045	364.416
							0	0	0	0	0	0	0	0	0	0	0	0	0	0	0	0	0	0	0	0		0	0	0	0	0	0	0	0	0	0	0	0	0	0	0	0	0	0		45.1718	127.045	364.416
							0	0	0	0	0	0	0	0	0	0	0	0	0	0	0	0	0	0	0	0		0	0	0	0	0	0	0	0	0	0	0	0	0	0	0	0	0	0		45.1718	127.045	364.416
							0	0	0	0	0	0	0	0	0	0	0	0	0	0	0	0	0	0	0	0		0	0	0	0	0	0	0	0	0	0	0	0	0	0	0	0	0	0		45.1718	127.045	364.416
							0	0	0	0	0	0	0	0	0	0	0	0	0	0	0	0	0	0	0	0		0	0	0	0	0	0	0	0	0	0	0	0	0	0	0	0	0	0		45.1718	127.045	364.416
							0	0	0	0	0	0	0	0	0	0	0	0	0	0	0	0	0	0	0	0		0	0	0	0	0	0	0	0	0	0	0	0	0	0	0	0	0	0		45.1718	127.045	364.416
							0	0	0	0	0	0	0	0	0	0	0	0	0	0	0	0	0	0	0	0		0	0	0	0	0	0	0	0	0	0	0	0	0	0	0	0	0	0		45.1718	127.045	364.416
							0	0	0	0	0	0	0	0	0	0	0	0	0	0	0	0	0	0	0	0		0	0	0	0	0	0	0	0	0	0	0	0	0	0	0	0	0	0		45.1718	127.045	364.416
							0	0	0	0	0	0	0	0	0	0	0	0	0	0	0	0	0	0	0	0		0	0	0	0	0	0	0	0	0	0	0	0	0	0	0	0	0	0		45.1718	127.045	364.416
							0	0	0	0	0	0	0	0	0	0	0	0	0	0	0	0	0	0	0	0		0	0	0	0	0	0	0	0	0	0	0	0	0	0	0	0	0	0		45.1718	127.045	364.416
							0	0	0	0	0	0	0	0	0	0	0	0	0	0	0	0	0	0	0	0		0	0	0	0	0	0	0	0	0	0	0	0	0	0	0	0	0	0		45.1718	127.045	364.416
							0	0	0	0	0	0	0	0	0	0	0	0	0	0	0	0	0	0	0	0		0	0	0	0	0	0	0	0	0	0	0	0	0	0	0	0	0	0		45.1718	127.045	364.416
							0	0	0	0	0	0	0	0	0	0	0	0	0	0	0	0	0	0	0	0		0	0	0	0	0	0	0	0	0	0	0	0	0	0	0	0	0	0		45.1718	127.045	364.416
							0	0	0	0	0	0	0	0	0	0	0	0	0	0	0	0	0	0	0	0		0	0	0	0	0	0	0	0	0	0	0	0	0	0	0	0	0	0		45.1718	127.045	364.416
							0	0	0	0	0	0	0	0	0	0	0	0	0	0	0	0	0	0	0	0		0	0	0	0	0	0	0	0	0	0	0	0	0	0	0	0	0	0		45.1718	127.045	364.416
							0	0	0	0	0	0	0	0	0	0	0	0	0	0	0	0	0	0	0	0		0	0	0	0	0	0	0	0	0	0	0	0	0	0	0	0	0	0		45.1718	127.045	364.416
							0	0	0	0	0	0	0	0	0	0	0	0	0	0	0	0	0	0	0	0		0	0	0	0	0	0	0	0	0	0	0	0	0	0	0	0	0	0		45.1718	127.045	364.416
							0	0	0	0	0	0	0	0	0	0	0	0	0	0	0	0	0	0	0	0		0	0	0	0	0	0	0	0	0	0	0	0	0	0	0	0	0	0		45.1718	127.045	364.416
							0	0	0	0	0	0	0	0	0	0	0	0	0	0	0	0	0	0	0	0		0	0	0	0	0	0	0	0	0	0	0	0	0	0	0	0	0	0		45.1718	127.045	364.416
							0	0	0	0	0	0	0	0	0	0	0	0	0	0	0	0	0	0	0	0		0	0	0	0	0	0	0	0	0	0	0	0	0	0	0	0	0	0		45.1718	127.045	364.416
							0	0	0	0	0	0	0	0	0	0	0	0	0	0	0	0	0	0	0	0		0	0	0	0	0	0	0	0	0	0	0	0	0	0	0	0	0	0		45.1718	127.045	364.416
							0	0	0	0	0	0	0	0	0	0	0	0	0	0	0	0	0	0	0	0		0	0	0	0	0	0	0	0	0	0	0	0	0	0	0	0	0	0		45.1718	127.045	364.416
							0	0	0	0	0	0	0	0	0	0	0	0	0	0	0	0	0	0	0	0		0	0	0	0	0	0	0	0	0	0	0	0	0	0	0	0	0	0		45.1718	127.045	364.416
							0	0	0	0	0	0	0	0	0	0	0	0	0	0	0	0	0	0	0	0		0	0	0	0	0	0	0	0	0	0	0	0	0	0	0	0	0	0		45.1718	127.045	364.416
							0	0	0	0	0	0	0	0	0	0	0	0	0	0	0	0	0	0	0	0		0	0	0	0	0	0	0	0	0	0	0	0	0	0	0	0	0	0		45.1718	127.045	364.416
							0	0	0	0	0	0	0	0	0	0	0	0	0	0	0	0	0	0	0	0		0	0	0	0	0	0	0	0	0	0	0	0	0	0	0	0	0	0		45.1718	127.045	364.416
							0	0	0	0	0	0	0	0	0	0	0	0	0	0	0	0	0	0	0	0		0	0	0	0	0	0	0	0	0	0	0	0	0	0	0	0	0	0		45.1718	127.045	364.416
							0	0	0	0	0	0	0	0	0	0	0	0	0	0	0	0	0	0	0	0		0	0	0	0	0	0	0	0	0	0	0	0	0	0	0	0	0	0		45.1718	127.045	364.416
							0	0	0	0	0	0	0	0	0	0	0	0	0	0	0	0	0	0	0	0		0	0	0	0	0	0	0	0	0	0	0	0	0	0	0	0	0	0		45.1718	127.045	364.416
							0	0	0	0	0	0	0	0	0	0	0	0	0	0	0	0	0	0	0	0		0	0	0	0	0	0	0	0	0	0	0	0	0	0	0	0	0	0		45.1718	127.045	364.416
							0	0	0	0	0	0	0	0	0	0	0	0	0	0	0	0	0	0	0	0		0	0	0	0	0	0	0	0	0	0	0	0	0	0	0	0	0	0		45.1718	127.045	364.416
							0	0	0	0	0	0	0	0	0	0	0	0	0	0	0	0	0	0	0	0		0	0	0	0	0	0	0	0	0	0	0	0	0	0	0	0	0	0		45.1718	127.045	364.416
							0	0	0	0	0	0	0	0	0	0	0	0	0	0	0	0	0	0	0	0		0	0	0	0	0	0	0	0	0	0	0	0	0	0	0	0	0	0		45.1718	127.045	364.416
							0	0	0	0	0	0	0	0	0	0	0	0	0	0	0	0	0	0	0	0		0	0	0	0	0	0	0	0	0	0	0	0	0	0	0	0	0	0		45.1718	127.045	364.416
							0	0	0	0	0	0	0	0	0	0	0	0	0	0	0	0	0	0	0	0		0	0	0	0	0	0	0	0	0	0	0	0	0	0	0	0	0	0		45.1718	127.045	364.416
							0	0	0	0	0	0	0	0	0	0	0	0	0	0	0	0	0	0	0	0		0	0	0	0	0	0	0	0	0	0	0	0	0	0	0	0	0	0		45.1718	127.045	364.416
							0	0	0	0	0	0	0	0	0	0	0	0	0	0	0	0	0	0	0	0		0	0	0	0	0	0	0	0	0	0	0	0	0	0	0	0	0	0		45.1718	127.045	364.416
							0	0	0	0	0	0	0	0	0	0	0	0	0	0	0	0	0	0	0	0		0	0	0	0	0	0	0	0	0	0	0	0	0	0	0	0	0	0		45.1718	127.045	364.416
							0	0	0	0	0	0	0	0	0	0	0	0	0	0	0	0	0	0	0	0		0	0	0	0	0	0	0	0	0	0	0	0	0	0	0	0	0	0		45.1718	127.045	364.416
							0	0	0	0	0	0	0	0	0	0	0	0	0	0	0	0	0	0	0	0		0	0	0	0	0	0	0	0	0	0	0	0	0	0	0	0	0	0		45.1718	127.045	364.416
							0	0	0	0	0	0	0	0	0	0	0	0	0	0	0	0	0	0	0	0		0	0	0	0	0	0	0	0	0	0	0	0	0	0	0	0	0	0		45.1718	127.045	364.416
							0	0	0	0	0	0	0	0	0	0	0	0	0	0	0	0	0	0	0	0		0	0	0	0	0	0	0	0	0	0	0	0	0	0	0	0	0	0		45.1718	127.045	364.416
							0	0	0	0	0	0	0	0	0	0	0	0	0	0	0	0	0	0	0	0		0	0	0	0	0	0	0	0	0	0	0	0	0	0	0	0	0	0		45.1718	127.045	364.416
							0	0	0	0	0	0	0	0	0	0	0	0	0	0	0	0	0	0	0	0		0	0	0	0	0	0	0	0	0	0	0	0	0	0	0	0	0	0		45.1718	127.045	364.416
							0	0	0	0	0	0	0	0	0	0	0	0	0	0	0	0	0	0	0	0		0	0	0	0	0	0	0	0	0	0	0	0	0	0	0	0	0	0		45.1718	127.045	364.416
							0	0	0	0	0	0	0	0	0	0	0	0	0	0	0	0	0	0	0	0		0	0	0	0	0	0	0	0	0	0	0	0	0	0	0	0	0	0		45.1718	127.045	364.416
							0	0	0	0	0	0	0	0	0	0	0	0	0	0	0	0	0	0	0	0		0	0	0	0	0	0	0	0	0	0	0	0	0	0	0	0	0	0		45.1718	127.045	364.416
							0	0	0	0	0	0	0	0	0	0	0	0	0	0	0	0	0	0	0	0		0	0	0	0	0	0	0	0	0	0	0	0	0	0	0	0	0	0		45.1718	127.045	364.416
							0	0	0	0	0	0	0	0	0	0	0	0	0	0	0	0	0	0	0	0		0	0	0	0	0	0	0	0	0	0	0	0	0	0	0	0	0	0		45.1718	127.045	364.416
							0	0	0	0	0	0	0	0	0	0	0	0	0	0	0	0	0	0	0	0		0	0	0	0	0	0	0	0	0	0	0	0	0	0	0	0	0	0		45.1718	127.045	364.416
							0	0	0	0	0	0	0	0	0	0	0	0	0	0	0	0	0	0	0	0		0	0	0	0	0	0	0	0	0	0	0	0	0	0	0	0	0	0		45.1718	127.045	364.416
							0	0	0	0	0	0	0	0	0	0	0	0	0	0	0	0	0	0	0	0		0	0	0	0	0	0	0	0	0	0	0	0	0	0	0	0	0	0		45.1718	127.045	364.416
							0	0	0	0	0	0	0	0	0	0	0	0	0	0	0	0	0	0	0	0		0	0	0	0	0	0	0	0	0	0	0	0	0	0	0	0	0	0		45.1718	127.045	364.416
							0	0	0	0	0	0	0	0	0	0	0	0	0	0	0	0	0	0	0	0		0	0	0	0	0	0	0	0	0	0	0	0	0	0	0	0	0	0		45.1718	127.045	364.416
							0	0	0	0	0	0	0	0	0	0	0	0	0	0	0	0	0	0	0	0		0	0	0	0	0	0	0	0	0	0	0	0	0	0	0	0	0	0		45.1718	127.045	364.416
							0	0	0	0	0	0	0	0	0	0	0	0	0	0	0	0	0	0	0	0		0	0	0	0	0	0	0	0	0	0	0	0	0	0	0	0	0	0		45.1718	127.045	364.416
							0	0	0	0	0	0	0	0	0	0	0	0	0	0	0	0	0	0	0	0		0	0	0	0	0	0	0	0	0	0	0	0	0	0	0	0	0	0		45.1718	127.045	364.416
							0	0	0	0	0	0	0	0	0	0	0	0	0	0	0	0	0	0	0	0		0	0	0	0	0	0	0	0	0	0	0	0	0	0	0	0	0	0		45.1718	127.045	364.416
							0	0	0	0	0	0	0	0	0	0	0	0	0	0	0	0	0	0	0	0		0	0	0	0	0	0	0	0	0	0	0	0	0	0	0	0	0	0		45.1718	127.045	364.416
							0	0	0	0	0	0	0	0	0	0	0	0	0	0	0	0	0	0	0	0		0	0	0	0	0	0	0	0	0	0	0	0	0	0	0	0	0	0		45.1718	127.045	364.416
							0	0	0	0	0	0	0	0	0	0	0	0	0	0	0	0	0	0	0	0		0	0	0	0	0	0	0	0	0	0	0	0	0	0	0	0	0	0		45.1718	127.045	364.416
							0	0	0	0	0	0	0	0	0	0	0	0	0	0	0	0	0	0	0	0		0	0	0	0	0	0	0	0	0	0	0	0	0	0	0	0	0	0		45.1718	127.045	364.416
							0	0	0	0	0	0	0	0	0	0	0	0	0	0	0	0	0	0	0	0		0	0	0	0	0	0	0	0	0	0	0	0	0	0	0	0	0	0		45.1718	127.045	364.416
							0	0	0	0	0	0	0	0	0	0	0	0	0	0	0	0	0	0	0	0		0	0	0	0	0	0	0	0	0	0	0	0	0	0	0	0	0	0		45.1718	127.045	364.416
							0	0	0	0	0	0	0	0	0	0	0	0	0	0	0	0	0	0	0	0		0	0	0	0	0	0	0	0	0	0	0	0	0	0	0	0	0	0		45.1718	127.045	364.416
							0	0	0	0	0	0	0	0	0	0	0	0	0	0	0	0	0	0	0	0		0	0	0	0	0	0	0	0	0	0	0	0	0	0	0	0	0	0		45.1718	127.045	364.416
							0	0	0	0	0	0	0	0	0	0	0	0	0	0	0	0	0	0	0	0		0	0	0	0	0	0	0	0	0	0	0	0	0	0	0	0	0	0		45.1718	127.045	364.416
							0	0	0	0	0	0	0	0	0	0	0	0	0	0	0	0	0	0	0	0		0	0	0	0	0	0	0	0	0	0	0	0	0	0	0	0	0	0		45.1718	127.045	364.416
							0	0	0	0	0	0	0	0	0	0	0	0	0	0	0	0	0	0	0	0		0	0	0	0	0	0	0	0	0	0	0	0	0	0	0	0	0	0		45.1718	127.045	364.416
							0	0	0	0	0	0	0	0	0	0	0	0	0	0	0	0	0	0	0	0		0	0	0	0	0	0	0	0	0	0	0	0	0	0	0	0	0	0		45.1718	127.045	364.416
							0	0	0	0	0	0	0	0	0	0	0	0	0	0	0	0	0	0	0	0		0	0	0	0	0	0	0	0	0	0	0	0	0	0	0	0	0	0		45.1718	127.045	364.416
							0	0	0	0	0	0	0	0	0	0	0	0	0	0	0	0	0	0	0	0		0	0	0	0	0	0	0	0	0	0	0	0	0	0	0	0	0	0		45.1718	127.045	364.416
							0	0	0	0	0	0	0	0	0	0	0	0	0	0	0	0	0	0	0	0		0	0	0	0	0	0	0	0	0	0	0	0	0	0	0	0	0	0		45.1718	127.045	364.416
							0	0	0	0	0	0	0	0	0	0	0	0	0	0	0	0	0	0	0	0		0	0	0	0	0	0	0	0	0	0	0	0	0	0	0	0	0	0		45.1718	127.045	364.416
							0	0	0	0	0	0	0	0	0	0	0	0	0	0	0	0	0	0	0	0		0	0	0	0	0	0	0	0	0	0	0	0	0	0	0	0	0	0		45.1718	127.045	364.416
							0	0	0	0	0	0	0	0	0	0	0	0	0	0	0	0	0	0	0	0		0	0	0	0	0	0	0	0	0	0	0	0	0	0	0	0	0	0		45.1718	127.045	364.416
							0	0	0	0	0	0	0	0	0	0	0	0	0	0	0	0	0	0	0	0		0	0	0	0	0	0	0	0	0	0	0	0	0	0	0	0	0	0		45.1718	127.045	364.416
							0	0	0	0	0	0	0	0	0	0	0	0	0	0	0	0	0	0	0	0		0	0	0	0	0	0	0	0	0	0	0	0	0	0	0	0	0	0		45.1718	127.045	364.416
							0	0	0	0	0	0	0	0	0	0	0	0	0	0	0	0	0	0	0	0		0	0	0	0	0	0	0	0	0	0	0	0	0	0	0	0	0	0		45.1718	127.045	364.416
							0	0	0	0	0	0	0	0	0	0	0	0	0	0	0	0	0	0	0	0		0	0	0	0	0	0	0	0	0	0	0	0	0	0	0	0	0	0		45.1718	127.045	364.416
							0	0	0	0	0	0	0	0	0	0	0	0	0	0	0	0	0	0	0	0		0	0	0	0	0	0	0	0	0	0	0	0	0	0	0	0	0	0		45.1718	127.045	364.416
							0	0	0	0	0	0	0	0	0	0	0	0	0	0	0	0	0	0	0	0		0	0	0	0	0	0	0	0	0	0	0	0	0	0	0	0	0	0		45.1718	127.045	364.416
							0	0	0	0	0	0	0	0	0	0	0	0	0	0	0	0	0	0	0	0		0	0	0	0	0	0	0	0	0	0	0	0	0	0	0	0	0	0		45.1718	127.045	364.416
							0	0	0	0	0	0	0	0	0	0	0	0	0	0	0	0	0	0	0	0		0	0	0	0	0	0	0	0	0	0	0	0	0	0	0	0	0	0		45.1718	127.045	364.416
							0	0	0	0	0	0	0	0	0	0	0	0	0	0	0	0	0	0	0	0		0	0	0	0	0	0	0	0	0	0	0	0	0	0	0	0	0	0		45.1718	127.045	364.416
							0	0	0	0	0	0	0	0	0	0	0	0	0	0	0	0	0	0	0	0		0	0	0	0	0	0	0	0	0	0	0	0	0	0	0	0	0	0		45.1718	127.045	364.416
							0	0	0	0	0	0	0	0	0	0	0	0	0	0	0	0	0	0	0	0		0	0	0	0	0	0	0	0	0	0	0	0	0	0	0	0	0	0		45.1718	127.045	364.416
							0	0	0	0	0	0	0	0	0	0	0	0	0	0	0	0	0	0	0	0		0	0	0	0	0	0	0	0	0	0	0	0	0	0	0	0	0	0		45.1718	127.045	364.416
							0	0	0	0	0	0	0	0	0	0	0	0	0	0	0	0	0	0	0	0		0	0	0	0	0	0	0	0	0	0	0	0	0	0	0	0	0	0		45.1718	127.045	364.416
							0	0	0	0	0	0	0	0	0	0	0	0	0	0	0	0	0	0	0	0		0	0	0	0	0	0	0	0	0	0	0	0	0	0	0	0	0	0		45.1718	127.045	364.416
							0	0	0	0	0	0	0	0	0	0	0	0	0	0	0	0	0	0	0	0		0	0	0	0	0	0	0	0	0	0	0	0	0	0	0	0	0	0		45.1718	127.045	364.416
							0	0	0	0	0	0	0	0	0	0	0	0	0	0	0	0	0	0	0	0		0	0	0	0	0	0	0	0	0	0	0	0	0	0	0	0	0	0		45.1718	127.045	364.416
							0	0	0	0	0	0	0	0	0	0	0	0	0	0	0	0	0	0	0	0		0	0	0	0	0	0	0	0	0	0	0	0	0	0	0	0	0	0		45.1718	127.045	364.416
							0	0	0	0	0	0	0	0	0	0	0	0	0	0	0	0	0	0	0	0		0	0	0	0	0	0	0	0	0	0	0	0	0	0	0	0	0	0		45.1718	127.045	364.416
							0	0	0	0	0	0	0	0	0	0	0	0	0	0	0	0	0	0	0	0		0	0	0	0	0	0	0	0	0	0	0	0	0	0	0	0	0	0		45.1718	127.045	364.416
							0	0	0	0	0	0	0	0	0	0	0	0	0	0	0	0	0	0	0	0		0	0	0	0	0	0	0	0	0	0	0	0	0	0	0	0	0	0		45.1718	127.045	364.416
							0	0	0	0	0	0	0	0	0	0	0	0	0	0	0	0	0	0	0	0		0	0	0	0	0	0	0	0	0	0	0	0	0	0	0	0	0	0		45.1718	127.045	364.416
							0	0	0	0	0	0	0	0	0	0	0	0	0	0	0	0	0	0	0	0		0	0	0	0	0	0	0	0	0	0	0	0	0	0	0	0	0	0		45.1718	127.045	364.416
							0	0	0	0	0	0	0	0	0	0	0	0	0	0	0	0	0	0	0	0		0	0	0	0	0	0	0	0	0	0	0	0	0	0	0	0	0	0		45.1718	127.045	364.416
							0	0	0	0	0	0	0	0	0	0	0	0	0	0	0	0	0	0	0	0		0	0	0	0	0	0	0	0	0	0	0	0	0	0	0	0	0	0		45.1718	127.045	364.416
							0	0	0	0	0	0	0	0	0	0	0	0	0	0	0	0	0	0	0	0		0	0	0	0	0	0	0	0	0	0	0	0	0	0	0	0	0	0		45.1718	127.045	364.416
							0	0	0	0	0	0	0	0	0	0	0	0	0	0	0	0	0	0	0	0		0	0	0	0	0	0	0	0	0	0	0	0	0	0	0	0	0	0		45.1718	127.045	364.416
							0	0	0	0	0	0	0	0	0	0	0	0	0	0	0	0	0	0	0	0		0	0	0	0	0	0	0	0	0	0	0	0	0	0	0	0	0	0		45.1718	127.045	364.416
							0	0	0	0	0	0	0	0	0	0	0	0	0	0	0	0	0	0	0	0		0	0	0	0	0	0	0	0	0	0	0	0	0	0	0	0	0	0		45.1718	127.045	364.416
							0	0	0	0	0	0	0	0	0	0	0	0	0	0	0	0	0	0	0	0		0	0	0	0	0	0	0	0	0	0	0	0	0	0	0	0	0	0		45.1718	127.045	364.416
							0	0	0	0	0	0	0	0	0	0	0	0	0	0	0	0	0	0	0	0		0	0	0	0	0	0	0	0	0	0	0	0	0	0	0	0	0	0		45.1718	127.045	364.416
							0	0	0	0	0	0	0	0	0	0	0	0	0	0	0	0	0	0	0	0		0	0	0	0	0	0	0	0	0	0	0	0	0	0	0	0	0	0		45.1718	127.045	364.416
							0	0	0	0	0	0	0	0	0	0	0	0	0	0	0	0	0	0	0	0		0	0	0	0	0	0	0	0	0	0	0	0	0	0	0	0	0	0		45.1718	127.045	364.416
							0	0	0	0	0	0	0	0	0	0	0	0	0	0	0	0	0	0	0	0		0	0	0	0	0	0	0	0	0	0	0	0	0	0	0	0	0	0		45.1718	127.045	364.416
							0	0	0	0	0	0	0	0	0	0	0	0	0	0	0	0	0	0	0	0		0	0	0	0	0	0	0	0	0	0	0	0	0	0	0	0	0	0		45.1718	127.045	364.416
							0	0	0	0	0	0	0	0	0	0	0	0	0	0	0	0	0	0	0	0		0	0	0	0	0	0	0	0	0	0	0	0	0	0	0	0	0	0		45.1718	127.045	364.416
							0	0	0	0	0	0	0	0	0	0	0	0	0	0	0	0	0	0	0	0		0	0	0	0	0	0	0	0	0	0	0	0	0	0	0	0	0	0		45.1718	127.045	364.416
							0	0	0	0	0	0	0	0	0	0	0	0	0	0	0	0	0	0	0	0		0	0	0	0	0	0	0	0	0	0	0	0	0	0	0	0	0	0		45.1718	127.045	364.416
							0	0	0	0	0	0	0	0	0	0	0	0	0	0	0	0	0	0	0	0		0	0	0	0	0	0	0	0	0	0	0	0	0	0	0	0	0	0		45.1718	127.045	364.416
							0	0	0	0	0	0	0	0	0	0	0	0	0	0	0	0	0	0	0	0		0	0	0	0	0	0	0	0	0	0	0	0	0	0	0	0	0	0		45.1718	127.045	364.416
							0	0	0	0	0	0	0	0	0	0	0	0	0	0	0	0	0	0	0	0		0	0	0	0	0	0	0	0	0	0	0	0	0	0	0	0	0	0		45.1718	127.045	364.416
							0	0	0	0	0	0	0	0	0	0	0	0	0	0	0	0	0	0	0	0		0	0	0	0	0	0	0	0	0	0	0	0	0	0	0	0	0	0		45.1718	127.045	364.416
							0	0	0	0	0	0	0	0	0	0	0	0	0	0	0	0	0	0	0	0		0	0	0	0	0	0	0	0	0	0	0	0	0	0	0	0	0	0		45.1718	127.045	364.416
							0	0	0	0	0	0	0	0	0	0	0	0	0	0	0	0	0	0	0	0		0	0	0	0	0	0	0	0	0	0	0	0	0	0	0	0	0	0		45.1718	127.045	364.416
							0	0	0	0	0	0	0	0	0	0	0	0	0	0	0	0	0	0	0	0		0	0	0	0	0	0	0	0	0	0	0	0	0	0	0	0	0	0		45.1718	127.045	364.416
							0	0	0	0	0	0	0	0	0	0	0	0	0	0	0	0	0	0	0	0		0	0	0	0	0	0	0	0	0	0	0	0	0	0	0	0	0	0		45.1718	127.045	364.416
							0	0	0	0	0	0	0	0	0	0	0	0	0	0	0	0	0	0	0	0		0	0	0	0	0	0	0	0	0	0	0	0	0	0	0	0	0	0		45.1718	127.045	364.416
							0	0	0	0	0	0	0	0	0	0	0	0	0	0	0	0	0	0	0	0		0	0	0	0	0	0	0	0	0	0	0	0	0	0	0	0	0	0		45.1718	127.045	364.416
							0	0	0	0	0	0	0	0	0	0	0	0	0	0	0	0	0	0	0	0		0	0	0	0	0	0	0	0	0	0	0	0	0	0	0	0	0	0		45.1718	127.045	364.416
							0	0	0	0	0	0	0	0	0	0	0	0	0	0	0	0	0	0	0	0		0	0	0	0	0	0	0	0	0	0	0	0	0	0	0	0	0	0		45.1718	127.045	364.416
							0	0	0	0	0	0	0	0	0	0	0	0	0	0	0	0	0	0	0	0		0	0	0	0	0	0	0	0	0	0	0	0	0	0	0	0	0	0		45.1718	127.045	364.416
							0	0	0	0	0	0	0	0	0	0	0	0	0	0	0	0	0	0	0	0		0	0	0	0	0	0	0	0	0	0	0	0	0	0	0	0	0	0		45.1718	127.045	364.416
							0	0	0	0	0	0	0	0	0	0	0	0	0	0	0	0	0	0	0	0		0	0	0	0	0	0	0	0	0	0	0	0	0	0	0	0	0	0		45.1718	127.045	364.416
							0	0	0	0	0	0	0	0	0	0	0	0	0	0	0	0	0	0	0	0		0	0	0	0	0	0	0	0	0	0	0	0	0	0	0	0	0	0		45.1718	127.045	364.416
							0	0	0	0	0	0	0	0	0	0	0	0	0	0	0	0	0	0	0	0		0	0	0	0	0	0	0	0	0	0	0	0	0	0	0	0	0	0		45.1718	127.045	364.416
							0	0	0	0	0	0	0	0	0	0	0	0	0	0	0	0	0	0	0	0		0	0	0	0	0	0	0	0	0	0	0	0	0	0	0	0	0	0		45.1718	127.045	364.416
							0	0	0	0	0	0	0	0	0	0	0	0	0	0	0	0	0	0	0	0		0	0	0	0	0	0	0	0	0	0	0	0	0	0	0	0	0	0		45.1718	127.045	364.416
							0	0	0	0	0	0	0	0	0	0	0	0	0	0	0	0	0	0	0	0		0	0	0	0	0	0	0	0	0	0	0	0	0	0	0	0	0	0		45.1718	127.045	364.416
							0	0	0	0	0	0	0	0	0	0	0	0	0	0	0	0	0	0	0	0		0	0	0	0	0	0	0	0	0	0	0	0	0	0	0	0	0	0		45.1718	127.045	364.416
							0	0	0	0	0	0	0	0	0	0	0	0	0	0	0	0	0	0	0	0		0	0	0	0	0	0	0	0	0	0	0	0	0	0	0	0	0	0		45.1718	127.045	364.416
							0	0	0	0	0	0	0	0	0	0	0	0	0	0	0	0	0	0	0	0		0	0	0	0	0	0	0	0	0	0	0	0	0	0	0	0	0	0		45.1718	127.045	364.416
							0	0	0	0	0	0	0	0	0	0	0	0	0	0	0	0	0	0	0	0		0	0	0	0	0	0	0	0	0	0	0	0	0	0	0	0	0	0		45.1718	127.045	364.416
							0	0	0	0	0	0	0	0	0	0	0	0	0	0	0	0	0	0	0	0		0	0	0	0	0	0	0	0	0	0	0	0	0	0	0	0	0	0		45.1718	127.045	364.416
							0	0	0	0	0	0	0	0	0	0	0	0	0	0	0	0	0	0	0	0		0	0	0	0	0	0	0	0	0	0	0	0	0	0	0	0	0	0		45.1718	127.045	364.416
							0	0	0	0	0	0	0	0	0	0	0	0	0	0	0	0	0	0	0	0		0	0	0	0	0	0	0	0	0	0	0	0	0	0	0	0	0	0		45.1718	127.045	364.416
							0	0	0	0	0	0	0	0	0	0	0	0	0	0	0	0	0	0	0	0		0	0	0	0	0	0	0	0	0	0	0	0	0	0	0	0	0	0		45.1718	127.045	364.416
							0	0	0	0	0	0	0	0	0	0	0	0	0	0	0	0	0	0	0	0		0	0	0	0	0	0	0	0	0	0	0	0	0	0	0	0	0	0		45.1718	127.045	364.416
							0	0	0	0	0	0	0	0	0	0	0	0	0	0	0	0	0	0	0	0		0	0	0	0	0	0	0	0	0	0	0	0	0	0	0	0	0	0		45.1718	127.045	364.416
							0	0	0	0	0	0	0	0	0	0	0	0	0	0	0	0	0	0	0	0		0	0	0	0	0	0	0	0	0	0	0	0	0	0	0	0	0	0		45.1718	127.045	364.416
							0	0	0	0	0	0	0	0	0	0	0	0	0	0	0	0	0	0	0	0		0	0	0	0	0	0	0	0	0	0	0	0	0	0	0	0	0	0		45.1718	127.045	364.416
							0	0	0	0	0	0	0	0	0	0	0	0	0	0	0	0	0	0	0	0		0	0	0	0	0	0	0	0	0	0	0	0	0	0	0	0	0	0		45.1718	127.045	364.416
							0	0	0	0	0	0	0	0	0	0	0	0	0	0	0	0	0	0	0	0		0	0	0	0	0	0	0	0	0	0	0	0	0	0	0	0	0	0		45.1718	127.045	364.416
							0	0	0	0	0	0	0	0	0	0	0	0	0	0	0	0	0	0	0	0		0	0	0	0	0	0	0	0	0	0	0	0	0	0	0	0	0	0		45.1718	127.045	364.416
							0	0	0	0	0	0	0	0	0	0	0	0	0	0	0	0	0	0	0	0		0	0	0	0	0	0	0	0	0	0	0	0	0	0	0	0	0	0		45.1718	127.045	364.416
							0	0	0	0	0	0	0	0	0	0	0	0	0	0	0	0	0	0	0	0		0	0	0	0	0	0	0	0	0	0	0	0	0	0	0	0	0	0		45.1718	127.045	364.416
							0	0	0	0	0	0	0	0	0	0	0	0	0	0	0	0	0	0	0	0		0	0	0	0	0	0	0	0	0	0	0	0	0	0	0	0	0	0		45.1718	127.045	364.416
							0	0	0	0	0	0	0	0	0	0	0	0	0	0	0	0	0	0	0	0		0	0	0	0	0	0	0	0	0	0	0	0	0	0	0	0	0	0		45.1718	127.045	364.416
							0	0	0	0	0	0	0	0	0	0	0	0	0	0	0	0	0	0	0	0		0	0	0	0	0	0	0	0	0	0	0	0	0	0	0	0	0	0		45.1718	127.045	364.416
							0	0	0	0	0	0	0	0	0	0	0	0	0	0	0	0	0	0	0	0		0	0	0	0	0	0	0	0	0	0	0	0	0	0	0	0	0	0		45.1718	127.045	364.416
							0	0	0	0	0	0	0	0	0	0	0	0	0	0	0	0	0	0	0	0		0	0	0	0	0	0	0	0	0	0	0	0	0	0	0	0	0	0		45.1718	127.045	364.416
							0	0	0	0	0	0	0	0	0	0	0	0	0	0	0	0	0	0	0	0		0	0	0	0	0	0	0	0	0	0	0	0	0	0	0	0	0	0		45.1718	127.045	364.416
							0	0	0	0	0	0	0	0	0	0	0	0	0	0	0	0	0	0	0	0		0	0	0	0	0	0	0	0	0	0	0	0	0	0	0	0	0	0		45.1718	127.045	364.416
							0	0	0	0	0	0	0	0	0	0	0	0	0	0	0	0	0	0	0	0		0	0	0	0	0	0	0	0	0	0	0	0	0	0	0	0	0	0		45.1718	127.045	364.416
							0	0	0	0	0	0	0	0	0	0	0	0	0	0	0	0	0	0	0	0		0	0	0	0	0	0	0	0	0	0	0	0	0	0	0	0	0	0		45.1718	127.045	364.416
							0	0	0	0	0	0	0	0	0	0	0	0	0	0	0	0	0	0	0	0		0	0	0	0	0	0	0	0	0	0	0	0	0	0	0	0	0	0		45.1718	127.045	364.416
							0	0	0	0	0	0	0	0	0	0	0	0	0	0	0	0	0	0	0	0		0	0	0	0	0	0	0	0	0	0	0	0	0	0	0	0	0	0		45.1718	127.045	364.416
							0	0	0	0	0	0	0	0	0	0	0	0	0	0	0	0	0	0	0	0		0	0	0	0	0	0	0	0	0	0	0	0	0	0	0	0	0	0		45.1718	127.045	364.416
							0	0	0	0	0	0	0	0	0	0	0	0	0	0	0	0	0	0	0	0		0	0	0	0	0	0	0	0	0	0	0	0	0	0	0	0	0	0		45.1718	127.045	364.416
							0	0	0	0	0	0	0	0	0	0	0	0	0	0	0	0	0	0	0	0		0	0	0	0	0	0	0	0	0	0	0	0	0	0	0	0	0	0		45.1718	127.045	364.416
							0	0	0	0	0	0	0	0	0	0	0	0	0	0	0	0	0	0	0	0		0	0	0	0	0	0	0	0	0	0	0	0	0	0	0	0	0	0		45.1718	127.045	364.416
							0	0	0	0	0	0	0	0	0	0	0	0	0	0	0	0	0	0	0	0		0	0	0	0	0	0	0	0	0	0	0	0	0	0	0	0	0	0		45.1718	127.045	364.416
							0	0	0	0	0	0	0	0	0	0	0	0	0	0	0	0	0	0	0	0		0	0	0	0	0	0	0	0	0	0	0	0	0	0	0	0	0	0		45.1718	127.045	364.416
							0	0	0	0	0	0	0	0	0	0	0	0	0	0	0	0	0	0	0	0		0	0	0	0	0	0	0	0	0	0	0	0	0	0	0	0	0	0		45.1718	127.045	364.416
							0	0	0	0	0	0	0	0	0	0	0	0	0	0	0	0	0	0	0	0		0	0	0	0	0	0	0	0	0	0	0	0	0	0	0	0	0	0		45.1718	127.045	364.416
							0	0	0	0	0	0	0	0	0	0	0	0	0	0	0	0	0	0	0	0		0	0	0	0	0	0	0	0	0	0	0	0	0	0	0	0	0	0		45.1718	127.045	364.416
							0	0	0	0	0	0	0	0	0	0	0	0	0	0	0	0	0	0	0	0		0	0	0	0	0	0	0	0	0	0	0	0	0	0	0	0	0	0		45.1718	127.045	364.416
							0	0	0	0	0	0	0	0	0	0	0	0	0	0	0	0	0	0	0	0		0	0	0	0	0	0	0	0	0	0	0	0	0	0	0	0	0	0		45.1718	127.045	364.416
							0	0	0	0	0	0	0	0	0	0	0	0	0	0	0	0	0	0	0	0		0	0	0	0	0	0	0	0	0	0	0	0	0	0	0	0	0	0		45.1718	127.045	364.416
							0	0	0	0	0	0	0	0	0	0	0	0	0	0	0	0	0	0	0	0		0	0	0	0	0	0	0	0	0	0	0	0	0	0	0	0	0	0		45.1718	127.045	364.416
							0	0	0	0	0	0	0	0	0	0	0	0	0	0	0	0	0	0	0	0		0	0	0	0	0	0	0	0	0	0	0	0	0	0	0	0	0	0		45.1718	127.045	364.416
							0	0	0	0	0	0	0	0	0	0	0	0	0	0	0	0	0	0	0	0		0	0	0	0	0	0	0	0	0	0	0	0	0	0	0	0	0	0		45.1718	127.045	364.416
							0	0	0	0	0	0	0	0	0	0	0	0	0	0	0	0	0	0	0	0		0	0	0	0	0	0	0	0	0	0	0	0	0	0	0	0	0	0		45.1718	127.045	364.416
							0	0	0	0	0	0	0	0	0	0	0	0	0	0	0	0	0	0	0	0		0	0	0	0	0	0	0	0	0	0	0	0	0	0	0	0	0	0		45.1718	127.045	364.416
							0	0	0	0	0	0	0	0	0	0	0	0	0	0	0	0	0	0	0	0		0	0	0	0	0	0	0	0	0	0	0	0	0	0	0	0	0	0		45.1718	127.045	364.416
							0	0	0	0	0	0	0	0	0	0	0	0	0	0	0	0	0	0	0	0		0	0	0	0	0	0	0	0	0	0	0	0	0	0	0	0	0	0		45.1718	127.045	364.416
							0	0	0	0	0	0	0	0	0	0	0	0	0	0	0	0	0	0	0	0		0	0	0	0	0	0	0	0	0	0	0	0	0	0	0	0	0	0		45.1718	127.045	364.416
							0	0	0	0	0	0	0	0	0	0	0	0	0	0	0	0	0	0	0	0		0	0	0	0	0	0	0	0	0	0	0	0	0	0	0	0	0	0		45.1718	127.045	364.416
							0	0	0	0	0	0	0	0	0	0	0	0	0	0	0	0	0	0	0	0		0	0	0	0	0	0	0	0	0	0	0	0	0	0	0	0	0	0		45.1718	127.045	364.416
							0	0	0	0	0	0	0	0	0	0	0	0	0	0	0	0	0	0	0	0		0	0	0	0	0	0	0	0	0	0	0	0	0	0	0	0	0	0		45.1718	127.045	364.416
							0	0	0	0	0	0	0	0	0	0	0	0	0	0	0	0	0	0	0	0		0	0	0	0	0	0	0	0	0	0	0	0	0	0	0	0	0	0		45.1718	127.045	364.416
							0	0	0	0	0	0	0	0	0	0	0	0	0	0	0	0	0	0	0	0		0	0	0	0	0	0	0	0	0	0	0	0	0	0	0	0	0	0		45.1718	127.045	364.416
							0	0	0	0	0	0	0	0	0	0	0	0	0	0	0	0	0	0	0	0		0	0	0	0	0	0	0	0	0	0	0	0	0	0	0	0	0	0		45.1718	127.045	364.416
							0	0	0	0	0	0	0	0	0	0	0	0	0	0	0	0	0	0	0	0		0	0	0	0	0	0	0	0	0	0	0	0	0	0	0	0	0	0		45.1718	127.045	364.416
							0	0	0	0	0	0	0	0	0	0	0	0	0	0	0	0	0	0	0	0		0	0	0	0	0	0	0	0	0	0	0	0	0	0	0	0	0	0		45.1718	127.045	364.416
							0	0	0	0	0	0	0	0	0	0	0	0	0	0	0	0	0	0	0	0		0	0	0	0	0	0	0	0	0	0	0	0	0	0	0	0	0	0		45.1718	127.045	364.416
							0	0	0	0	0	0	0	0	0	0	0	0	0	0	0	0	0	0	0	0		0	0	0	0	0	0	0	0	0	0	0	0	0	0	0	0	0	0		45.1718	127.045	364.416
							0	0	0	0	0	0	0	0	0	0	0	0	0	0	0	0	0	0	0	0		0	0	0	0	0	0	0	0	0	0	0	0	0	0	0	0	0	0		45.1718	127.045	364.416
							670	0	0	0	0	0	0	0	0	0	0	0	0	0	0	0	0	0	0	0		0	0	0	0	0	0	0	0	0	0	0	0	0	0	0	0	0	0		45.1718	127.045	364.416
							0	0	0	0	0	0	0	0	0	0	0	0	0	0	0	0	0	0	0	0		0	0	0	0	0	0	0	0	0	0	0	0	0	0	0	0	0	0		45.1718	127.045	364.416
							0	0	0	0	0	0	0	0	0	0	0	0	0	0	0	0	0	0	0	0		0	0	0	0	0	0	0	0	0	0	0	0	0	0	0	0	0	0		45.1718	127.045	364.416
							0	0	0	0	0	0	0	0	0	0	0	0	0	0	0	0	0	0	0	0		0	0	0	0	0	0	0	0	0	0	0	0	0	0	0	0	0	0		45.1718	127.045	364.416
							0	0	0	0	0	0	0	0	0	0	0	0	0	0	0	0	0	0	0	0		0	0	0	0	0	0	0	0	0	0	0	0	0	0	0	0	0	0		45.1718	127.045	364.416
							0	0	0	0	0	0	0	0	0	0	0	0	0	0	0	0	0	0	0	0		0	0	0	0	0	0	0	0	0	0	0	0	0	0	0	0	0	0		45.1718	127.045	364.416
							0	0	0	0	0	0	0	0	0	0	0	0	0	0	0	0	0	0	0	0		0	0	0	0	0	0	0	0	0	0	0	0	0	0	0	0	0	0		45.1718	127.045	364.416
							0	0	0	0	0	0	0	0	0	0	0	0	0	0	0	0	0	0	0	0		0	0	0	0	0	0	0	0	0	0	0	0	0	0	0	0	0	0		45.1718	127.045	364.416
							0	0	0	0	0	0	0	0	0	0	0	0	0	0	0	0	0	0	0	0		0	0	0	0	0	0	0	0	0	0	0	0	0	0	0	0	0	0		45.1718	127.045	364.416
							0	0	0	0	0	0	0	0	0	0	0	0	0	0	0	0	0	0	0	0		0	0	0	0	0	0	0	0	0	0	0	0	0	0	0	0	0	0		45.1718	127.045	364.416
							0	0	0	0	0	0	0	0	0	0	0	0	0	0	0	0	0	0	0	0		0	0	0	0	0	0	0	0	0	0	0	0	0	0	0	0	0	0		45.1718	127.045	364.416
							0	0	0	0	0	0	0	0	0	0	0	0	0	0	0	0	0	0	0	0		0	0	0	0	0	0	0	0	0	0	0	0	0	0	0	0	0	0		45.1718	127.045	364.416
							0	0	0	0	0	0	0	0	0	0	0	0	0	0	0	0	0	0	0	0		0	0	0	0	0	0	0	0	0	0	0	0	0	0	0	0	0	0		45.1718	127.045	364.416
							0	0	0	0	0	0	0	0	0	0	0	0	0	0	0	0	0	0	0	0		0	0	0	0	0	0	0	0	0	0	0	0	0	0	0	0	0	0		45.1718	127.045	364.416
							0	0	0	0	0	0	0	0	0	0	0	0	0	0	0	0	0	0	0	0		0	0	0	0	0	0	0	0	0	0	0	0	0	0	0	0	0	0		45.1718	127.045	364.416
							0	0	0	0	0	0	0	0	0	0	0	0	0	0	0	0	0	0	0	0		0	0	0	0	0	0	0	0	0	0	0	0	0	0	0	0	0	0		45.1718	127.045	364.416
							0	0	0	0	0	0	0	0	0	0	0	0	0	0	0	0	0	0	0	0		0	0	0	0	0	0	0	0	0	0	0	0	0	0	0	0	0	0		45.1718	127.045	364.416
							0	0	0	0	0	0	0	0	0	0	0	0	0	0	0	0	0	0	0	0		0	0	0	0	0	0	0	0	0	0	0	0	0	0	0	0	0	0		45.1718	127.045	364.416
							0	0	0	0	0	0	0	0	0	0	0	0	0	0	0	0	0	0	0	0		0	0	0	0	0	0	0	0	0	0	0	0	0	0	0	0	0	0		45.1718	127.045	364.416
							0	0	0	0	0	0	0	0	0	0	0	0	0	0	0	0	0	0	0	0		0	0	0	0	0	0	0	0	0	0	0	0	0	0	0	0	0	0		45.1718	127.045	364.416
							0	0	0	0	0	0	0	0	0	0	0	0	0	0	0	0	0	0	0	0		0	0	0	0	0	0	0	0	0	0	0	0	0	0	0	0	0	0		45.1718	127.045	364.416
							0	0	0	0	0	0	0	0	0	0	0	0	0	0	0	0	0	0	0	0		0	0	0	0	0	0	0	0	0	0	0	0	0	0	0	0	0	0		45.1718	127.045	364.416
							0	0	0	0	0	0	0	0	0	0	0	0	0	0	0	0	0	0	0	0		0	0	0	0	0	0	0	0	0	0	0	0	0	0	0	0	0	0		45.1718	127.045	364.416
							0	0	0	0	0	0	0	0	0	0	0	0	0	0	0	0	0	0	0	0		0	0	0	0	0	0	0	0	0	0	0	0	0	0	0	0	0	0		45.1718	127.045	364.416
							0	0	0	0	0	0	0	0	0	0	0	0	0	0	0	0	0	0	0	0		0	0	0	0	0	0	0	0	0	0	0	0	0	0	0	0	0	0		45.1718	127.045	364.416
							0	0	0	0	0	0	0	0	0	0	0	0	0	0	0	0	0	0	0	0		0	0	0	0	0	0	0	0	0	0	0	0	0	0	0	0	0	0		45.1718	127.045	364.416
							0	0	0	0	0	0	0	0	0	0	0	0	0	0	0	0	0	0	0	0		0	0	0	0	0	0	0	0	0	0	0	0	0	0	0	0	0	0		45.1718	127.045	364.416
							0	0	0	0	0	0	0	0	0	0	0	0	0	0	0	0	0	0	0	0		0	0	0	0	0	0	0	0	0	0	0	0	0	0	0	0	0	0		45.1718	127.045	364.416
							0	0	0	0	0	0	0	0	0	0	0	0	0	0	0	0	0	0	0	0		0	0	0	0	0	0	0	0	0	0	0	0	0	0	0	0	0	0		45.1718	127.045	364.416
							0	0	0	0	0	0	0	0	0	0	0	0	0	0	0	0	0	0	0	0		0	0	0	0	0	0	0	0	0	0	0	0	0	0	0	0	0	0		45.1718	127.045	364.416
							0	0	0	0	0	0	0	0	0	0	0	0	0	0	0	0	0	0	0	0		0	0	0	0	0	0	0	0	0	0	0	0	0	0	0	0	0	0		45.1718	127.045	364.416
							0	0	0	0	0	0	0	0	0	0	0	0	0	0	0	0	0	0	0	0		0	0	0	0	0	0	0	0	0	0	0	0	0	0	0	0	0	0		45.1718	127.045	364.416
							0	0	0	0	0	0	0	0	0	0	0	0	0	0	0	0	0	0	0	0		0	0	0	0	0	0	0	0	0	0	0	0	0	0	0	0	0	0		45.1718	127.045	364.416
							0	0	0	0	0	0	0	0	0	0	0	0	0	0	0	0	0	0	0	0		0	0	0	0	0	0	0	0	0	0	0	0	0	0	0	0	0	0		45.1718	127.045	364.416
							0	0	0	0	0	0	0	0	0	0	0	0	0	0	0	0	0	0	0	0		0	0	0	0	0	0	0	0	0	0	0	0	0	0	0	0	0	0		45.1718	127.045	364.416
							0	0	0	0	0	0	0	0	0	0	0	0	0	0	0	0	0	0	0	0		0	0	0	0	0	0	0	0	0	0	0	0	0	0	0	0	0	0		45.1718	127.045	364.416
							0	0	0	0	0	0	0	0	0	0	0	0	0	0	0	0	0	0	0	0		0	0	0	0	0	0	0	0	0	0	0	0	0	0	0	0	0	0		45.1718	127.045	364.416
							0	0	0	0	0	0	0	0	0	0	0	0	0	0	0	0	0	0	0	0		0	0	0	0	0	0	0	0	0	0	0	0	0	0	0	0	0	0		45.1718	127.045	364.416
							0	0	0	0	0	0	0	0	0	0	0	0	0	0	0	0	0	0	0	0		0	0	0	0	0	0	0	0	0	0	0	0	0	0	0	0	0	0		45.1718	127.045	364.416
							0	0	0	0	0	0	0	0	0	0	0	0	0	0	0	0	0	0	0	0		0	0	0	0	0	0	0	0	0	0	0	0	0	0	0	0	0	0		45.1718	127.045	364.416
							0	0	0	0	0	0	0	0	0	0	0	0	0	0	0	0	0	0	0	0		0	0	0	0	0	0	0	0	0	0	0	0	0	0	0	0	0	0		45.1718	127.045	364.416
							0	0	0	0	0	0	0	0	0	0	0	0	0	0	0	0	0	0	0	0		0	0	0	0	0	0	0	0	0	0	0	0	0	0	0	0	0	0		45.1718	127.045	364.416
							0	0	0	0	0	0	0	0	0	0	0	0	0	0	0	0	0	0	0	0		0	0	0	0	0	0	0	0	0	0	0	0	0	0	0	0	0	0		45.1718	127.045	364.416
							0	0	0	0	0	0	0	0	0	0	0	0	0	0	0	0	0	0	0	0		0	0	0	0	0	0	0	0	0	0	0	0	0	0	0	0	0	0		45.1718	127.045	364.416
							0	0	0	0	0	0	0	0	0	0	0	0	0	0	0	0	0	0	0	0		0	0	0	0	0	0	0	0	0	0	0	0	0	0	0	0	0	0		45.1718	127.045	364.416
							0	0	0	0	0	0	0	0	0	0	0	0	0	0	0	0	0	0	0	0		0	0	0	0	0	0	0	0	0	0	0	0	0	0	0	0	0	0		45.1718	127.045	364.416
							0	0	0	0	0	0	0	0	0	0	0	0	0	0	0	0	0	0	0	0		0	0	0	0	0	0	0	0	0	0	0	0	0	0	0	0	0	0		45.1718	127.045	364.416
							0	0	0	0	0	0	0	0	0	0	0	0	0	0	0	0	0	0	0	0		0	0	0	0	0	0	0	0	0	0	0	0	0	0	0	0	0	0		45.1718	127.045	364.416
							0	0	0	0	0	0	0	0	0	0	0	0	0	0	0	0	0	0	0	0		0	0	0	0	0	0	0	0	0	0	0	0	0	0	0	0	0	0		45.1718	127.045	364.416
							0	0	0	0	0	0	0	0	0	0	0	0	0	0	0	0	0	0	0	0		0	0	0	0	0	0	0	0	0	0	0	0	0	0	0	0	0	0		45.1718	127.045	364.416
							0	0	0	0	0	0	0	0	0	0	0	0	0	0	0	0	0	0	0	0		0	0	0	0	0	0	0	0	0	0	0	0	0	0	0	0	0	0		45.1718	127.045	364.416
							0	0	0	0	0	0	0	0	0	0	0	0	0	0	0	0	0	0	0	0		0	0	0	0	0	0	0	0	0	0	0	0	0	0	0	0	0	0		45.1718	127.045	364.416
							0	0	0	0	0	0	0	0	0	0	0	0	0	0	0	0	0	0	0	0		0	0	0	0	0	0	0	0	0	0	0	0	0	0	0	0	0	0		45.1718	127.045	364.416
							0	0	0	0	0	0	0	0	0	0	0	0	0	0	0	0	0	0	0	0		0	0	0	0	0	0	0	0	0	0	0	0	0	0	0	0	0	0		45.1718	127.045	364.416
							0	0	0	0	0	0	0	0	0	0	0	0	0	0	0	0	0	0	0	0		0	0	0	0	0	0	0	0	0	0	0	0	0	0	0	0	0	0		45.1718	127.045	364.416
							0	0	0	0	0	0	0	0	0	0	0	0	0	0	0	0	0	0	0	0		0	0	0	0	0	0	0	0	0	0	0	0	0	0	0	0	0	0		45.1718	127.045	364.416
							0	0	0	0	0	0	0	0	0	0	0	0	0	0	0	0	0	0	0	0		0	0	0	0	0	0	0	0	0	0	0	0	0	0	0	0	0	0		45.1718	127.045	364.416
							0	0	0	0	0	0	0	0	0	0	0	0	0	0	0	0	0	0	0	0		0	0	0	0	0	0	0	0	0	0	0	0	0	0	0	0	0	0		45.1718	127.045	364.416
							0	0	0	0	0	0	0	0	0	0	0	0	0	0	0	0	0	0	0	0		0	0	0	0	0	0	0	0	0	0	0	0	0	0	0	0	0	0		45.1718	127.045	364.416
							0	0	0	0	0	0	0	0	0	0	0	0	0	0	0	0	0	0	0	0		0	0	0	0	0	0	0	0	0	0	0	0	0	0	0	0	0	0		45.1718	127.045	364.416
							0	0	0	0	0	0	0	0	0	0	0	0	0	0	0	0	0	0	0	0		0	0	0	0	0	0	0	0	0	0	0	0	0	0	0	0	0	0		45.1718	127.045	364.416
							0	0	0	0	0	0	0	0	0	0	0	0	0	0	0	0	0	0	0	0		0	0	0	0	0	0	0	0	0	0	0	0	0	0	0	0	0	0		45.1718	127.045	364.416
							0	0	0	0	0	0	0	0	0	0	0	0	0	0	0	0	0	0	0	0		0	0	0	0	0	0	0	0	0	0	0	0	0	0	0	0	0	0		45.1718	127.045	364.416
							0	0	0	0	0	0	0	0	0	0	0	0	0	0	0	0	0	0	0	0		0	0	0	0	0	0	0	0	0	0	0	0	0	0	0	0	0	0		45.1718	127.045	364.416
							0	0	0	0	0	0	0	0	0	0	0	0	0	0	0	0	0	0	0	0		0	0	0	0	0	0	0	0	0	0	0	0	0	0	0	0	0	0		45.1718	127.045	364.416
							0	0	0	0	0	0	0	0	0	0	0	0	0	0	0	0	0	0	0	0		0	0	0	0	0	0	0	0	0	0	0	0	0	0	0	0	0	0		45.1718	127.045	364.416
							0	0	0	0	0	0	0	0	0	0	0	0	0	0	0	0	0	0	0	0		0	0	0	0	0	0	0	0	0	0	0	0	0	0	0	0	0	0		45.1718	127.045	364.416
							0	0	0	0	0	0	0	0	0	0	0	0	0	0	0	0	0	0	0	0		0	0	0	0	0	0	0	0	0	0	0	0	0	0	0	0	0	0		45.1718	127.045	364.416
							0	0	0	0	0	0	0	0	0	0	0	0	0	0	0	0	0	0	0	0		0	0	0	0	0	0	0	0	0	0	0	0	0	0	0	0	0	0		45.1718	127.045	364.416
							0	0	0	0	0	0	0	0	0	0	0	0	0	0	0	0	0	0	0	0		0	0	0	0	0	0	0	0	0	0	0	0	0	0	0	0	0	0		45.1718	127.045	364.416
							0	0	0	0	0	0	0	0	0	0	0	0	0	0	0	0	0	0	0	0		0	0	0	0	0	0	0	0	0	0	0	0	0	0	0	0	0	0		45.1718	127.045	364.416
							0	0	0	0	0	0	0	0	0	0	0	0	0	0	0	0	0	0	0	0		0	0	0	0	0	0	0	0	0	0	0	0	0	0	0	0	0	0		45.1718	127.045	364.416
							0	0	0	0	0	0	0	0	0	0	0	0	0	0	0	0	0	0	0	0		0	0	0	0	0	0	0	0	0	0	0	0	0	0	0	0	0	0		45.1718	127.045	364.416
							0	0	0	0	0	0	0	0	0	0	0	0	0	0	0	0	0	0	0	0		0	0	0	0	0	0	0	0	0	0	0	0	0	0	0	0	0	0		45.1718	127.045	364.416
							0	0	0	0	0	0	0	0	0	0	0	0	0	0	0	0	0	0	0	0		0	0	0	0	0	0	0	0	0	0	0	0	0	0	0	0	0	0		45.1718	127.045	364.416
							0	0	0	0	0	0	0	0	0	0	0	0	0	0	0	0	0	0	0	0		0	0	0	0	0	0	0	0	0	0	0	0	0	0	0	0	0	0		45.1718	127.045	364.416
							0	0	0	0	0	0	0	0	0	0	0	0	0	0	0	0	0	0	0	0		0	0	0	0	0	0	0	0	0	0	0	0	0	0	0	0	0	0		45.1718	127.045	364.416
							0	0	0	0	0	0	0	0	0	0	0	0	0	0	0	0	0	0	0	0		0	0	0	0	0	0	0	0	0	0	0	0	0	0	0	0	0	0		45.1718	127.045	364.416
							0	0	0	0	0	0	0	0	0	0	0	0	0	0	0	0	0	0	0	0		0	0	0	0	0	0	0	0	0	0	0	0	0	0	0	0	0	0		45.1718	127.045	364.416
							0	0	0	0	0	0	0	0	0	0	0	0	0	0	0	0	0	0	0	0		0	0	0	0	0	0	0	0	0	0	0	0	0	0	0	0	0	0		45.1718	127.045	364.416
							0	0	0	0	0	0	0	0	0	0	0	0	0	0	0	0	0	0	0	0		0	0	0	0	0	0	0	0	0	0	0	0	0	0	0	0	0	0		45.1718	127.045	364.416
							0	0	0	0	0	0	0	0	0	0	0	0	0	0	0	0	0	0	0	0		0	0	0	0	0	0	0	0	0	0	0	0	0	0	0	0	0	0		45.1718	127.045	364.416
							0	0	0	0	0	0	0	0	0	0	0	0	0	0	0	0	0	0	0	0		0	0	0	0	0	0	0	0	0	0	0	0	0	0	0	0	0	0		45.1718	127.045	364.416
							0	0	0	0	0	0	0	0	0	0	0	0	0	0	0	0	0	0	0	0		0	0	0	0	0	0	0	0	0	0	0	0	0	0	0	0	0	0		45.1718	127.045	364.416
							0	0	0	0	0	0	0	0	0	0	0	0	0	0	0	0	0	0	0	0		0	0	0	0	0	0	0	0	0	0	0	0	0	0	0	0	0	0		45.1718	127.045	364.416
							0	0	0	0	0	0	0	0	0	0	0	0	0	0	0	0	0	0	0	0		0	0	0	0	0	0	0	0	0	0	0	0	0	0	0	0	0	0		45.1718	127.045	364.416
							0	0	0	0	0	0	0	0	0	0	0	0	0	0	0	0	0	0	0	0		0	0	0	0	0	0	0	0	0	0	0	0	0	0	0	0	0	0		45.1718	127.045	364.416
							0	0	0	0	0	0	0	0	0	0	0	0	0	0	0	0	0	0	0	0		0	0	0	0	0	0	0	0	0	0	0	0	0	0	0	0	0	0		45.1718	127.045	364.416
							0	0	0	0	0	0	0	0	0	0	0	0	0	0	0	0	0	0	0	0		0	0	0	0	0	0	0	0	0	0	0	0	0	0	0	0	0	0		45.1718	127.045	364.416
							729	0	0	0	0	0	0	0	0	0	0	0	0	0	0	0	0	0	0	0		0	0	0	0	0	0	0	0	0	0	0	0	0	0	0	0	0	0		45.1718	127.045	364.416
							0	0	0	0	0	0	0	0	0	0	0	0	0	0	0	0	0	0	0	0		0	0	0	0	0	0	0	0	0	0	0	0	0	0	0	0	0	0		45.1718	127.045	364.416
							0	0	0	0	0	0	0	0	0	0	0	0	0	0	0	0	0	0	0	0		0	0	0	0	0	0	0	0	0	0	0	0	0	0	0	0	0	0		45.1718	127.045	364.416
							0	0	0	0	0	0	0	0	0	0	0	0	0	0	0	0	0	0	0	0		0	0	0	0	0	0	0	0	0	0	0	0	0	0	0	0	0	0		45.1718	127.045	364.416
							0	0	0	0	0	0	0	0	0	0	0	0	0	0	0	0	0	0	0	0		0	0	0	0	0	0	0	0	0	0	0	0	0	0	0	0	0	0		45.1718	127.045	364.416
							0	0	0	0	0	0	0	0	0	0	0	0	0	0	0	0	0	0	0	0		0	0	0	0	0	0	0	0	0	0	0	0	0	0	0	0	0	0		45.1718	127.045	364.416
							0	0	0	0	0	0	0	0	0	0	0	0	0	0	0	0	0	0	0	0		0	0	0	0	0	0	0	0	0	0	0	0	0	0	0	0	0	0		45.1718	127.045	364.416
							0	0	0	0	0	0	0	0	0	0	0	0	0	0	0	0	0	0	0	0		0	0	0	0	0	0	0	0	0	0	0	0	0	0	0	0	0	0		45.1718	127.045	364.416
							0	0	0	0	0	0	0	0	0	0	0	0	0	0	0	0	0	0	0	0		0	0	0	0	0	0	0	0	0	0	0	0	0	0	0	0	0	0		45.1718	127.045	364.416
							0	0	0	0	0	0	0	0	0	0	0	0	0	0	0	0	0	0	0	0		0	0	0	0	0	0	0	0	0	0	0	0	0	0	0	0	0	0		45.1718	127.045	364.416
							0	0	0	0	0	0	0	0	0	0	0	0	0	0	0	0	0	0	0	0		0	0	0	0	0	0	0	0	0	0	0	0	0	0	0	0	0	0		45.1718	127.045	364.416
							0	0	0	0	0	0	0	0	0	0	0	0	0	0	0	0	0	0	0	0		0	0	0	0	0	0	0	0	0	0	0	0	0	0	0	0	0	0		45.1718	127.045	364.416
							0	0	0	0	0	0	0	0	0	0	0	0	0	0	0	0	0	0	0	0		0	0	0	0	0	0	0	0	0	0	0	0	0	0	0	0	0	0		45.1718	127.045	364.416
							0	0	0	0	0	0	0	0	0	0	0	0	0	0	0	0	0	0	0	0		0	0	0	0	0	0	0	0	0	0	0	0	0	0	0	0	0	0		45.1718	127.045	364.416
							0	0	0	0	0	0	0	0	0	0	0	0	0	0	0	0	0	0	0	0		0	0	0	0	0	0	0	0	0	0	0	0	0	0	0	0	0	0		45.1718	127.045	364.416
							0	0	0	0	0	0	0	0	0	0	0	0	0	0	0	0	0	0	0	0		0	0	0	0	0	0	0	0	0	0	0	0	0	0	0	0	0	0		45.1718	127.045	364.416
							0	0	0	0	0	0	0	0	0	0	0	0	0	0	0	0	0	0	0	0		0	0	0	0	0	0	0	0	0	0	0	0	0	0	0	0	0	0		45.1718	127.045	364.416
							0	0	0	0	0	0	0	0	0	0	0	0	0	0	0	0	0	0	0	0		0	0	0	0	0	0	0	0	0	0	0	0	0	0	0	0	0	0		45.1718	127.045	364.416
							0	0	0	0	0	0	0	0	0	0	0	0	0	0	0	0	0	0	0	0		0	0	0	0	0	0	0	0	0	0	0	0	0	0	0	0	0	0		45.1718	127.045	364.416
							0	0	0	0	0	0	0	0	0	0	0	0	0	0	0	0	0	0	0	0		0	0	0	0	0	0	0	0	0	0	0	0	0	0	0	0	0	0		45.1718	127.045	364.416
							0	0	0	0	0	0	0	0	0	0	0	0	0	0	0	0	0	0	0	0		0	0	0	0	0	0	0	0	0	0	0	0	0	0	0	0	0	0		45.1718	127.045	364.416
							0	0	0	0	0	0	0	0	0	0	0	0	0	0	0	0	0	0	0	0		0	0	0	0	0	0	0	0	0	0	0	0	0	0	0	0	0	0		45.1718	127.045	364.416
							0	0	0	0	0	0	0	0	0	0	0	0	0	0	0	0	0	0	0	0		0	0	0	0	0	0	0	0	0	0	0	0	0	0	0	0	0	0		45.1718	127.045	364.416
							0	0	0	0	0	0	0	0	0	0	0	0	0	0	0	0	0	0	0	0		0	0	0	0	0	0	0	0	0	0	0	0	0	0	0	0	0	0		45.1718	127.045	364.416
							0	0	0	0	0	0	0	0	0	0	0	0	0	0	0	0	0	0	0	0		0	0	0	0	0	0	0	0	0	0	0	0	0	0	0	0	0	0		45.1718	127.045	364.416
							0	0	0	0	0	0	0	0	0	0	0	0	0	0	0	0	0	0	0	0		0	0	0	0	0	0	0	0	0	0	0	0	0	0	0	0	0	0		45.1718	127.045	364.416
							0	0	0	0	0	0	0	0	0	0	0	0	0	0	0	0	0	0	0	0		0	0	0	0	0	0	0	0	0	0	0	0	0	0	0	0	0	0		45.1718	127.045	364.416
							0	0	0	0	0	0	0	0	0	0	0	0	0	0	0	0	0	0	0	0		0	0	0	0	0	0	0	0	0	0	0	0	0	0	0	0	0	0		45.1718	127.045	364.416
							0	0	0	0	0	0	0	0	0	0	0	0	0	0	0	0	0	0	0	0		0	0	0	0	0	0	0	0	0	0	0	0	0	0	0	0	0	0		45.1718	127.045	364.416
							0	0	0	0	0	0	0	0	0	0	0	0	0	0	0	0	0	0	0	0		0	0	0	0	0	0	0	0	0	0	0	0	0	0	0	0	0	0		45.1718	127.045	364.416
							0	0	0	0	0	0	0	0	0	0	0	0	0	0	0	0	0	0	0	0		0	0	0	0	0	0	0	0	0	0	0	0	0	0	0	0	0	0		45.1718	127.045	364.416
							0	0	0	0	0	0	0	0	0	0	0	0	0	0	0	0	0	0	0	0		0	0	0	0	0	0	0	0	0	0	0	0	0	0	0	0	0	0		45.1718	127.045	364.416
							0	0	0	0	0	0	0	0	0	0	0	0	0	0	0	0	0	0	0	0		0	0	0	0	0	0	0	0	0	0	0	0	0	0	0	0	0	0		45.1718	127.045	364.416
							0	0	0	0	0	0	0	0	0	0	0	0	0	0	0	0	0	0	0	0		0	0	0	0	0	0	0	0	0	0	0	0	0	0	0	0	0	0		45.1718	127.045	364.416
							0	0	0	0	0	0	0	0	0	0	0	0	0	0	0	0	0	0	0	0		0	0	0	0	0	0	0	0	0	0	0	0	0	0	0	0	0	0		45.1718	127.045	364.416
							0	0	0	0	0	0	0	0	0	0	0	0	0	0	0	0	0	0	0	0		0	0	0	0	0	0	0	0	0	0	0	0	0	0	0	0	0	0		45.1718	127.045	364.416
							0	0	0	0	0	0	0	0	0	0	0	0	0	0	0	0	0	0	0	0		0	0	0	0	0	0	0	0	0	0	0	0	0	0	0	0	0	0		45.1718	127.045	364.416
							0	0	0	0	0	0	0	0	0	0	0	0	0	0	0	0	0	0	0	0		0	0	0	0	0	0	0	0	0	0	0	0	0	0	0	0	0	0		45.1718	127.045	364.416
							0	0	0	0	0	0	0	0	0	0	0	0	0	0	0	0	0	0	0	0		0	0	0	0	0	0	0	0	0	0	0	0	0	0	0	0	0	0		45.1718	127.045	364.416
							0	0	0	0	0	0	0	0	0	0	0	0	0	0	0	0	0	0	0	0		0	0	0	0	0	0	0	0	0	0	0	0	0	0	0	0	0	0		45.1718	127.045	364.416
							0	0	0	0	0	0	0	0	0	0	0	0	0	0	0	0	0	0	0	0		0	0	0	0	0	0	0	0	0	0	0	0	0	0	0	0	0	0		45.1718	127.045	364.416
							0	0	0	0	0	0	0	0	0	0	0	0	0	0	0	0	0	0	0	0		0	0	0	0	0	0	0	0	0	0	0	0	0	0	0	0	0	0		45.1718	127.045	364.416
							0	0	0	0	0	0	0	0	0	0	0	0	0	0	0	0	0	0	0	0		0	0	0	0	0	0	0	0	0	0	0	0	0	0	0	0	0	0		45.1718	127.045	364.416
							0	0	0	0	0	0	0	0	0	0	0	0	0	0	0	0	0	0	0	0		0	0	0	0	0	0	0	0	0	0	0	0	0	0	0	0	0	0		45.1718	127.045	364.416
							0	0	0	0	0	0	0	0	0	0	0	0	0	0	0	0	0	0	0	0		0	0	0	0	0	0	0	0	0	0	0	0	0	0	0	0	0	0		45.1718	127.045	364.416
							0	0	0	0	0	0	0	0	0	0	0	0	0	0	0	0	0	0	0	0		0	0	0	0	0	0	0	0	0	0	0	0	0	0	0	0	0	0		45.1718	127.045	364.416
							0	0	0	0	0	0	0	0	0	0	0	0	0	0	0	0	0	0	0	0		0	0	0	0	0	0	0	0	0	0	0	0	0	0	0	0	0	0		45.1718	127.045	364.416
							0	0	0	0	0	0	0	0	0	0	0	0	0	0	0	0	0	0	0	0		0	0	0	0	0	0	0	0	0	0	0	0	0	0	0	0	0	0		45.1718	127.045	364.416
							0	0	0	0	0	0	0	0	0	0	0	0	0	0	0	0	0	0	0	0		0	0	0	0	0	0	0	0	0	0	0	0	0	0	0	0	0	0		45.1718	127.045	364.416
							0	0	0	0	0	0	0	0	0	0	0	0	0	0	0	0	0	0	0	0		0	0	0	0	0	0	0	0	0	0	0	0	0	0	0	0	0	0		45.1718	127.045	364.416
							0	0	0	0	0	0	0	0	0	0	0	0	0	0	0	0	0	0	0	0		0	0	0	0	0	0	0	0	0	0	0	0	0	0	0	0	0	0		45.1718	127.045	364.416
							0	0	0	0	0	0	0	0	0	0	0	0	0	0	0	0	0	0	0	0		0	0	0	0	0	0	0	0	0	0	0	0	0	0	0	0	0	0		45.1718	127.045	364.416
							0	0	0	0	0	0	0	0	0	0	0	0	0	0	0	0	0	0	0	0		0	0	0	0	0	0	0	0	0	0	0	0	0	0	0	0	0	0		45.1718	127.045	364.416
							0	0	0	0	0	0	0	0	0	0	0	0	0	0	0	0	0	0	0	0		0	0	0	0	0	0	0	0	0	0	0	0	0	0	0	0	0	0		45.1718	127.045	364.416
							0	0	0	0	0	0	0	0	0	0	0	0	0	0	0	0	0	0	0	0		0	0	0	0	0	0	0	0	0	0	0	0	0	0	0	0	0	0		45.1718	127.045	364.416
							0	0	0	0	0	0	0	0	0	0	0	0	0	0	0	0	0	0	0	0		0	0	0	0	0	0	0	0	0	0	0	0	0	0	0	0	0	0		45.1718	127.045	364.416
							0	0	0	0	0	0	0	0	0	0	0	0	0	0	0	0	0	0	0	0		0	0	0	0	0	0	0	0	0	0	0	0	0	0	0	0	0	0		45.1718	127.045	364.416
							0	0	0	0	0	0	0	0	0	0	0	0	0	0	0	0	0	0	0	0		0	0	0	0	0	0	0	0	0	0	0	0	0	0	0	0	0	0		45.1718	127.045	364.416
							0	0	0	0	0	0	0	0	0	0	0	0	0	0	0	0	0	0	0	0		0	0	0	0	0	0	0	0	0	0	0	0	0	0	0	0	0	0		45.1718	127.045	364.416
							0	0	0	0	0	0	0	0	0	0	0	0	0	0	0	0	0	0	0	0		0	0	0	0	0	0	0	0	0	0	0	0	0	0	0	0	0	0		45.1718	127.045	364.416
							0	0	0	0	0	0	0	0	0	0	0	0	0	0	0	0	0	0	0	0		0	0	0	0	0	0	0	0	0	0	0	0	0	0	0	0	0	0		45.1718	127.045	364.416
							0	0	0	0	0	0	0	0	0	0	0	0	0	0	0	0	0	0	0	0		0	0	0	0	0	0	0	0	0	0	0	0	0	0	0	0	0	0		45.1718	127.045	364.416
							0	0	0	0	0	0	0	0	0	0	0	0	0	0	0	0	0	0	0	0		0	0	0	0	0	0	0	0	0	0	0	0	0	0	0	0	0	0		45.1718	127.045	364.416
							0	0	0	0	0	0	0	0	0	0	0	0	0	0	0	0	0	0	0	0		0	0	0	0	0	0	0	0	0	0	0	0	0	0	0	0	0	0		45.1718	127.045	364.416
							0	0	0	0	0	0	0	0	0	0	0	0	0	0	0	0	0	0	0	0		0	0	0	0	0	0	0	0	0	0	0	0	0	0	0	0	0	0		45.1718	127.045	364.416
							0	0	0	0	0	0	0	0	0	0	0	0	0	0	0	0	0	0	0	0		0	0	0	0	0	0	0	0	0	0	0	0	0	0	0	0	0	0		45.1718	127.045	364.416
							0	0	0	0	0	0	0	0	0	0	0	0	0	0	0	0	0	0	0	0		0	0	0	0	0	0	0	0	0	0	0	0	0	0	0	0	0	0		45.1718	127.045	364.416
							0	0	0	0	0	0	0	0	0	0	0	0	0	0	0	0	0	0	0	0		0	0	0	0	0	0	0	0	0	0	0	0	0	0	0	0	0	0		45.1718	127.045	364.416
							0	0	0	0	0	0	0	0	0	0	0	0	0	0	0	0	0	0	0	0		0	0	0	0	0	0	0	0	0	0	0	0	0	0	0	0	0	0		45.1718	127.045	364.416
							0	0	0	0	0	0	0	0	0	0	0	0	0	0	0	0	0	0	0	0		0	0	0	0	0	0	0	0	0	0	0	0	0	0	0	0	0	0		45.1718	127.045	364.416
							0	0	0	0	0	0	0	0	0	0	0	0	0	0	0	0	0	0	0	0		0	0	0	0	0	0	0	0	0	0	0	0	0	0	0	0	0	0		45.1718	127.045	364.416
							0	0	0	0	0	0	0	0	0	0	0	0	0	0	0	0	0	0	0	0		0	0	0	0	0	0	0	0	0	0	0	0	0	0	0	0	0	0		45.1718	127.045	364.416
							0	0	0	0	0	0	0	0	0	0	0	0	0	0	0	0	0	0	0	0		0	0	0	0	0	0	0	0	0	0	0	0	0	0	0	0	0	0		45.1718	127.045	364.416
							0	0	0	0	0	0	0	0	0	0	0	0	0	0	0	0	0	0	0	0		0	0	0	0	0	0	0	0	0	0	0	0	0	0	0	0	0	0		45.1718	127.045	364.416
							0	0	0	0	0	0	0	0	0	0	0	0	0	0	0	0	0	0	0	0		0	0	0	0	0	0	0	0	0	0	0	0	0	0	0	0	0	0		45.1718	127.045	364.416
							0	0	0	0	0	0	0	0	0	0	0	0	0	0	0	0	0	0	0	0		0	0	0	0	0	0	0	0	0	0	0	0	0	0	0	0	0	0		45.1718	127.045	364.416
							0	0	0	0	0	0	0	0	0	0	0	0	0	0	0	0	0	0	0	0		0	0	0	0	0	0	0	0	0	0	0	0	0	0	0	0	0	0		45.1718	127.045	364.416
							0	0	0	0	0	0	0	0	0	0	0	0	0	0	0	0	0	0	0	0		0	0	0	0	0	0	0	0	0	0	0	0	0	0	0	0	0	0		45.1718	127.045	364.416
							0	0	0	0	0	0	0	0	0	0	0	0	0	0	0	0	0	0	0	0		0	0	0	0	0	0	0	0	0	0	0	0	0	0	0	0	0	0		45.1718	127.045	364.416
							0	0	0	0	0	0	0	0	0	0	0	0	0	0	0	0	0	0	0	0		0	0	0	0	0	0	0	0	0	0	0	0	0	0	0	0	0	0		45.1718	127.045	364.416
							0	0	0	0	0	0	0	0	0	0	0	0	0	0	0	0	0	0	0	0		0	0	0	0	0	0	0	0	0	0	0	0	0	0	0	0	0	0		45.1718	127.045	364.416
							0	0	0	0	0	0	0	0	0	0	0	0	0	0	0	0	0	0	0	0		0	0	0	0	0	0	0	0	0	0	0	0	0	0	0	0	0	0		45.1718	127.045	364.416
							0	0	0	0	0	0	0	0	0	0	0	0	0	0	0	0	0	0	0	0		0	0	0	0	0	0	0	0	0	0	0	0	0	0	0	0	0	0		45.1718	127.045	364.416
							0	0	0	0	0	0	0	0	0	0	0	0	0	0	0	0	0	0	0	0		0	0	0	0	0	0	0	0	0	0	0	0	0	0	0	0	0	0		45.1718	127.045	364.416
							0	0	0	0	0	0	0	0	0	0	0	0	0	0	0	0	0	0	0	0		0	0	0	0	0	0	0	0	0	0	0	0	0	0	0	0	0	0		45.1718	127.045	364.416
							0	0	0	0	0	0	0	0	0	0	0	0	0	0	0	0	0	0	0	0		0	0	0	0	0	0	0	0	0	0	0	0	0	0	0	0	0	0		45.1718	127.045	364.416
							0	0	0	0	0	0	0	0	0	0	0	0	0	0	0	0	0	0	0	0		0	0	0	0	0	0	0	0	0	0	0	0	0	0	0	0	0	0		45.1718	127.045	364.416
							0	0	0	0	0	0	0	0	0	0	0	0	0	0	0	0	0	0	0	0		0	0	0	0	0	0	0	0	0	0	0	0	0	0	0	0	0	0		45.1718	127.045	364.416
							0	0	0	0	0	0	0	0	0	0	0	0	0	0	0	0	0	0	0	0		0	0	0	0	0	0	0	0	0	0	0	0	0	0	0	0	0	0		45.1718	127.045	364.416
							0	0	0	0	0	0	0	0	0	0	0	0	0	0	0	0	0	0	0	0		0	0	0	0	0	0	0	0	0	0	0	0	0	0	0	0	0	0		45.1718	127.045	364.416
							0	0	0	0	0	0	0	0	0	0	0	0	0	0	0	0	0	0	0	0		0	0	0	0	0	0	0	0	0	0	0	0	0	0	0	0	0	0		45.1718	127.045	364.416
							0	0	0	0	0	0	0	0	0	0	0	0	0	0	0	0	0	0	0	0		0	0	0	0	0	0	0	0	0	0	0	0	0	0	0	0	0	0		45.1718	127.045	364.416
							0	0	0	0	0	0	0	0	0	0	0	0	0	0	0	0	0	0	0	0		0	0	0	0	0	0	0	0	0	0	0	0	0	0	0	0	0	0		45.1718	127.045	364.416
							0	0	0	0	0	0	0	0	0	0	0	0	0	0	0	0	0	0	0	0		0	0	0	0	0	0	0	0	0	0	0	0	0	0	0	0	0	0		45.1718	127.045	364.416
							0	0	0	0	0	0	0	0	0	0	0	0	0	0	0	0	0	0	0	0		0	0	0	0	0	0	0	0	0	0	0	0	0	0	0	0	0	0		45.1718	127.045	364.416
							0	0	0	0	0	0	0	0	0	0	0	0	0	0	0	0	0	0	0	0		0	0	0	0	0	0	0	0	0	0	0	0	0	0	0	0	0	0		45.1718	127.045	364.416
							0	0	0	0	0	0	0	0	0	0	0	0	0	0	0	0	0	0	0	0		0	0	0	0	0	0	0	0	0	0	0	0	0	0	0	0	0	0		45.1718	127.045	364.416
							0	0	0	0	0	0	0	0	0	0	0	0	0	0	0	0	0	0	0	0		0	0	0	0	0	0	0	0	0	0	0	0	0	0	0	0	0	0		45.1718	127.045	364.416
							0	0	0	0	0	0	0	0	0	0	0	0	0	0	0	0	0	0	0	0		0	0	0	0	0	0	0	0	0	0	0	0	0	0	0	0	0	0		45.1718	127.045	364.416
							0	0	0	0	0	0	0	0	0	0	0	0	0	0	0	0	0	0	0	0		0	0	0	0	0	0	0	0	0	0	0	0	0	0	0	0	0	0		45.1718	127.045	364.416
							0	0	0	0	0	0	0	0	0	0	0	0	0	0	0	0	0	0	0	0		0	0	0	0	0	0	0	0	0	0	0	0	0	0	0	0	0	0		45.1718	127.045	364.416
							0	0	0	0	0	0	0	0	0	0	0	0	0	0	0	0	0	0	0	0		0	0	0	0	0	0	0	0	0	0	0	0	0	0	0	0	0	0		45.1718	127.045	364.416
							0	0	0	0	0	0	0	0	0	0	0	0	0	0	0	0	0	0	0	0		0	0	0	0	0	0	0	0	0	0	0	0	0	0	0	0	0	0		45.1718	127.045	364.416
							0	0	0	0	0	0	0	0	0	0	0	0	0	0	0	0	0	0	0	0		0	0	0	0	0	0	0	0	0	0	0	0	0	0	0	0	0	0		45.1718	127.045	364.416
							0	0	0	0	0	0	0	0	0	0	0	0	0	0	0	0	0	0	0	0		0	0	0	0	0	0	0	0	0	0	0	0	0	0	0	0	0	0		45.1718	127.045	364.416
							0	0	0	0	0	0	0	0	0	0	0	0	0	0	0	0	0	0	0	0		0	0	0	0	0	0	0	0	0	0	0	0	0	0	0	0	0	0		45.1718	127.045	364.416
							0	0	0	0	0	0	0	0	0	0	0	0	0	0	0	0	0	0	0	0		0	0	0	0	0	0	0	0	0	0	0	0	0	0	0	0	0	0		45.1718	127.045	364.416
							0	0	0	0	0	0	0	0	0	0	0	0	0	0	0	0	0	0	0	0		0	0	0	0	0	0	0	0	0	0	0	0	0	0	0	0	0	0		45.1718	127.045	364.416
							0	0	0	0	0	0	0	0	0	0	0	0	0	0	0	0	0	0	0	0		0	0	0	0	0	0	0	0	0	0	0	0	0	0	0	0	0	0		45.1718	127.045	364.416
							0	0	0	0	0	0	0	0	0	0	0	0	0	0	0	0	0	0	0	0		0	0	0	0	0	0	0	0	0	0	0	0	0	0	0	0	0	0		45.1718	127.045	364.416
							0	0	0	0	0	0	0	0	0	0	0	0	0	0	0	0	0	0	0	0		0	0	0	0	0	0	0	0	0	0	0	0	0	0	0	0	0	0		45.1718	127.045	364.416
							0	0	0	0	0	0	0	0	0	0	0	0	0	0	0	0	0	0	0	0		0	0	0	0	0	0	0	0	0	0	0	0	0	0	0	0	0	0		45.1718	127.045	364.416
							0	0	0	0	0	0	0	0	0	0	0	0	0	0	0	0	0	0	0	0		0	0	0	0	0	0	0	0	0	0	0	0	0	0	0	0	0	0		45.1718	127.045	364.416
							0	0	0	0	0	0	0	0	0	0	0	0	0	0	0	0	0	0	0	0		0	0	0	0	0	0	0	0	0	0	0	0	0	0	0	0	0	0		45.1718	127.045	364.416
							0	0	0	0	0	0	0	0	0	0	0	0	0	0	0	0	0	0	0	0		0	0	0	0	0	0	0	0	0	0	0	0	0	0	0	0	0	0		45.1718	127.045	364.416
							0	0	0	0	0	0	0	0	0	0	0	0	0	0	0	0	0	0	0	0		0	0	0	0	0	0	0	0	0	0	0	0	0	0	0	0	0	0		45.1718	127.045	364.416
							0	0	0	0	0	0	0	0	0	0	0	0	0	0	0	0	0	0	0	0		0	0	0	0	0	0	0	0	0	0	0	0	0	0	0	0	0	0		45.1718	127.045	364.416
							0	0	0	0	0	0	0	0	0	0	0	0	0	0	0	0	0	0	0	0		0	0	0	0	0	0	0	0	0	0	0	0	0	0	0	0	0	0		45.1718	127.045	364.416
							0	0	0	0	0	0	0	0	0	0	0	0	0	0	0	0	0	0	0	0		0	0	0	0	0	0	0	0	0	0	0	0	0	0	0	0	0	0		45.1718	127.045	364.416
							0	0	0	0	0	0	0	0	0	0	0	0	0	0	0	0	0	0	0	0		0	0	0	0	0	0	0	0	0	0	0	0	0	0	0	0	0	0		45.1718	127.045	364.416
							0	0	0	0	0	0	0	0	0	0	0	0	0	0	0	0	0	0	0	0		0	0	0	0	0	0	0	0	0	0	0	0	0	0	0	0	0	0		45.1718	127.045	364.416
							0	0	0	0	0	0	0	0	0	0	0	0	0	0	0	0	0	0	0	0		0	0	0	0	0	0	0	0	0	0	0	0	0	0	0	0	0	0		45.1718	127.045	364.416
							0	0	0	0	0	0	0	0	0	0	0	0	0	0	0	0	0	0	0	0		0	0	0	0	0	0	0	0	0	0	0	0	0	0	0	0	0	0		45.1718	127.045	364.416
							0	0	0	0	0	0	0	0	0	0	0	0	0	0	0	0	0	0	0	0		0	0	0	0	0	0	0	0	0	0	0	0	0	0	0	0	0	0		45.1718	127.045	364.416
							0	0	0	0	0	0	0	0	0	0	0	0	0	0	0	0	0	0	0	0		0	0	0	0	0	0	0	0	0	0	0	0	0	0	0	0	0	0		45.1718	127.045	364.416
							0	0	0	0	0	0	0	0	0	0	0	0	0	0	0	0	0	0	0	0		0	0	0	0	0	0	0	0	0	0	0	0	0	0	0	0	0	0		45.1718	127.045	364.416
							0	0	0	0	0	0	0	0	0	0	0	0	0	0	0	0	0	0	0	0		0	0	0	0	0	0	0	0	0	0	0	0	0	0	0	0	0	0		45.1718	127.045	364.416
							0	0	0	0	0	0	0	0	0	0	0	0	0	0	0	0	0	0	0	0		0	0	0	0	0	0	0	0	0	0	0	0	0	0	0	0	0	0		45.1718	127.045	364.416
							0	0	0	0	0	0	0	0	0	0	0	0	0	0	0	0	0	0	0	0		0	0	0	0	0	0	0	0	0	0	0	0	0	0	0	0	0	0		45.1718	127.045	364.416
							0	0	0	0	0	0	0	0	0	0	0	0	0	0	0	0	0	0	0	0		0	0	0	0	0	0	0	0	0	0	0	0	0	0	0	0	0	0		45.1718	127.045	364.416
							0	0	0	0	0	0	0	0	0	0	0	0	0	0	0	0	0	0	0	0		0	0	0	0	0	0	0	0	0	0	0	0	0	0	0	0	0	0		45.1718	127.045	364.416
							0	0	0	0	0	0	0	0	0	0	0	0	0	0	0	0	0	0	0	0		0	0	0	0	0	0	0	0	0	0	0	0	0	0	0	0	0	0		45.1718	127.045	364.416
							0	0	0	0	0	0	0	0	0	0	0	0	0	0	0	0	0	0	0	0		0	0	0	0	0	0	0	0	0	0	0	0	0	0	0	0	0	0		45.1718	127.045	364.416
							0	0	0	0	0	0	0	0	0	0	0	0	0	0	0	0	0	0	0	0		0	0	0	0	0	0	0	0	0	0	0	0	0	0	0	0	0	0		45.1718	127.045	364.416
							0	0	0	0	0	0	0	0	0	0	0	0	0	0	0	0	0	0	0	0		0	0	0	0	0	0	0	0	0	0	0	0	0	0	0	0	0	0		45.1718	127.045	364.416
							0	0	0	0	0	0	0	0	0	0	0	0	0	0	0	0	0	0	0	0		0	0	0	0	0	0	0	0	0	0	0	0	0	0	0	0	0	0		45.1718	127.045	364.416
							0	0	0	0	0	0	0	0	0	0	0	0	0	0	0	0	0	0	0	0		0	0	0	0	0	0	0	0	0	0	0	0	0	0	0	0	0	0		45.1718	127.045	364.416
							0	0	0	0	0	0	0	0	0	0	0	0	0	0	0	0	0	0	0	0		0	0	0	0	0	0	0	0	0	0	0	0	0	0	0	0	0	0		45.1718	127.045	364.416
							0	0	0	0	0	0	0	0	0	0	0	0	0	0	0	0	0	0	0	0		0	0	0	0	0	0	0	0	0	0	0	0	0	0	0	0	0	0		45.1718	127.045	364.416
							0	0	0	0	0	0	0	0	0	0	0	0	0	0	0	0	0	0	0	0		0	0	0	0	0	0	0	0	0	0	0	0	0	0	0	0	0	0		45.1718	127.045	364.416
							0	0	0	0	0	0	0	0	0	0	0	0	0	0	0	0	0	0	0	0		0	0	0	0	0	0	0	0	0	0	0	0	0	0	0	0	0	0		45.1718	127.045	364.416
							0	0	0	0	0	0	0	0	0	0	0	0	0	0	0	0	0	0	0	0		0	0	0	0	0	0	0	0	0	0	0	0	0	0	0	0	0	0		45.1718	127.045	364.416
							0	0	0	0	0	0	0	0	0	0	0	0	0	0	0	0	0	0	0	0		0	0	0	0	0	0	0	0	0	0	0	0	0	0	0	0	0	0		45.1718	127.045	364.416
							0	0	0	0	0	0	0	0	0	0	0	0	0	0	0	0	0	0	0	0		0	0	0	0	0	0	0	0	0	0	0	0	0	0	0	0	0	0		45.1718	127.045	364.416
							0	0	0	0	0	0	0	0	0	0	0	0	0	0	0	0	0	0	0	0		0	0	0	0	0	0	0	0	0	0	0	0	0	0	0	0	0	0		45.1718	127.045	364.416
							0	0	0	0	0	0	0	0	0	0	0	0	0	0	0	0	0	0	0	0		0	0	0	0	0	0	0	0	0	0	0	0	0	0	0	0	0	0		45.1718	127.045	364.416
							0	0	0	0	0	0	0	0	0	0	0	0	0	0	0	0	0	0	0	0		0	0	0	0	0	0	0	0	0	0	0	0	0	0	0	0	0	0		45.1718	127.045	364.416
							0	0	0	0	0	0	0	0	0	0	0	0	0	0	0	0	0	0	0	0		0	0	0	0	0	0	0	0	0	0	0	0	0	0	0	0	0	0		45.1718	127.045	364.416
							0	0	0	0	0	0	0	0	0	0	0	0	0	0	0	0	0	0	0	0		0	0	0	0	0	0	0	0	0	0	0	0	0	0	0	0	0	0		45.1718	127.045	364.416
							0	0	0	0	0	0	0	0	0	0	0	0	0	0	0	0	0	0	0	0		0	0	0	0	0	0	0	0	0	0	0	0	0	0	0	0	0	0		45.1718	127.045	364.416
							0	0	0	0	0	0	0	0	0	0	0	0	0	0	0	0	0	0	0	0		0	0	0	0	0	0	0	0	0	0	0	0	0	0	0	0	0	0		45.1718	127.045	364.416
							0	0	0	0	0	0	0	0	0	0	0	0	0	0	0	0	0	0	0	0		0	0	0	0	0	0	0	0	0	0	0	0	0	0	0	0	0	0		45.1718	127.045	364.416
							0	0	0	0	0	0	0	0	0	0	0	0	0	0	0	0	0	0	0	0		0	0	0	0	0	0	0	0	0	0	0	0	0	0	0	0	0	0		45.1718	127.045	364.416
							0	0	0	0	0	0	0	0	0	0	0	0	0	0	0	0	0	0	0	0		0	0	0	0	0	0	0	0	0	0	0	0	0	0	0	0	0	0		45.1718	127.045	364.416
							0	0	0	0	0	0	0	0	0	0	0	0	0	0	0	0	0	0	0	0		0	0	0	0	0	0	0	0	0	0	0	0	0	0	0	0	0	0		45.1718	127.045	364.416
							0	0	0	0	0	0	0	0	0	0	0	0	0	0	0	0	0	0	0	0		0	0	0	0	0	0	0	0	0	0	0	0	0	0	0	0	0	0		45.1718	127.045	364.416
							0	0	0	0	0	0	0	0	0	0	0	0	0	0	0	0	0	0	0	0		0	0	0	0	0	0	0	0	0	0	0	0	0	0	0	0	0	0		45.1718	127.045	364.416
							0	0	0	0	0	0	0	0	0	0	0	0	0	0	0	0	0	0	0	0		0	0	0	0	0	0	0	0	0	0	0	0	0	0	0	0	0	0		45.1718	127.045	364.416
							0	0	0	0	0	0	0	0	0	0	0	0	0	0	0	0	0	0	0	0		0	0	0	0	0	0	0	0	0	0	0	0	0	0	0	0	0	0		45.1718	127.045	364.416
							0	0	0	0	0	0	0	0	0	0	0	0	0	0	0	0	0	0	0	0		0	0	0	0	0	0	0	0	0	0	0	0	0	0	0	0	0	0		45.1718	127.045	364.416
							0	0	0	0	0	0	0	0	0	0	0	0	0	0	0	0	0	0	0	0		0	0	0	0	0	0	0	0	0	0	0	0	0	0	0	0	0	0		45.1718	127.045	364.416
							0	0	0	0	0	0	0	0	0	0	0	0	0	0	0	0	0	0	0	0		0	0	0	0	0	0	0	0	0	0	0	0	0	0	0	0	0	0		45.1718	127.045	364.416
							0	0	0	0	0	0	0	0	0	0	0	0	0	0	0	0	0	0	0	0		0	0	0	0	0	0	0	0	0	0	0	0	0	0	0	0	0	0		45.1718	127.045	364.416
							0	0	0	0	0	0	0	0	0	0	0	0	0	0	0	0	0	0	0	0		0	0	0	0	0	0	0	0	0	0	0	0	0	0	0	0	0	0		45.1718	127.045	364.416
							0	0	0	0	0	0	0	0	0	0	0	0	0	0	0	0	0	0	0	0		0	0	0	0	0	0	0	0	0	0	0	0	0	0	0	0	0	0		45.1718	127.045	364.416
[truncated: 16 more columns]
